***Atn2*-CAG100-KnockIn mouse spinal cord shows progressive  
TDP43 pathology associated with cholesterol biosynthesis suppression**

Júlia Canet-Pons<sup>1§</sup>, Nesli-Ece Sen<sup>1,2§</sup>, Aleksandar Arsovic<sup>1</sup>, Luis-Enrique Almaguer-Mederos<sup>1,3</sup>, Melanie V. Halbach<sup>1</sup>, Jana Key<sup>1,2</sup>, Claudia Döring<sup>4</sup>, Anja Kerksiek<sup>5</sup>, Gina Picchiarelli<sup>6</sup>, Raphaelle Cassel<sup>6</sup>, Frédérique René<sup>6</sup>, Stéphane Dieterlé<sup>6</sup>, Nina Hein-Fuchs<sup>7</sup>, Renate König<sup>7</sup>, Luc Dupuis<sup>6</sup>, Dieter Lütjohann<sup>5</sup>, Suzana Gispert<sup>1</sup>, Georg Auburger<sup>1#</sup>

<sup>1</sup> Experimental Neurology, Medical Faculty, Goethe University, 60590 Frankfurt am Main, Germany;

<sup>2</sup> Faculty of Biosciences, Goethe University, 60438 Frankfurt am Main, Germany;

<sup>3</sup> Center for Investigation and Rehabilitation of Hereditary Ataxias (CIRAH), Holguín, Cuba;

<sup>4</sup> Dr. Senckenberg Institute of Pathology, Medical Faculty, Goethe University, 60590 Frankfurt am Main, Germany;

<sup>5</sup> Institute for Clinical Chemistry and Clinical Pharmacology, Medical Faculty, University Bonn, 53127 Bonn, Nordrhein-Westfalen, Germany;

<sup>6</sup> UMRS-1118 INSERM, Faculty of Medicine, University of Strasbourg, 67000 Strasbourg, France;

<sup>7</sup> Host-Pathogen Interactions, Paul-Ehrlich-Institute, 63225 Langen, Germany.

<sup>§</sup> Joint first authorship

<sup>#</sup> Correspondence to: [auburger@em.uni-frankfurt.de](mailto:auburger@em.uni-frankfurt.de),

Tel: +49-69-6301-7428, FAX: +49-69-6301-7142

**Acknowledgements:**

For their technical assistance, we are grateful to Birgitt Meseck-Selchow and Gabriele Köpf in Frankfurt, to Jérôme Sinniger in Strasbourg, and to the staff of the ZFE animal facility at the Goethe University in Frankfurt. For financial support, we thank the Deutsche Forschungsgemeinschaft (grants AU96/11-1 and 11-3 to GA).

**Abstract:**

Large polyglutamine expansions in Ataxin-2 (ATXN2) cause multi-system nervous atrophy in Spinocerebellar Ataxia type 2 (SCA2). Intermediate size expansions carry a risk for selective motor neuron degeneration, known as Amyotrophic Lateral Sclerosis (ALS). Conversely, the depletion of ATXN2 prevents disease progression in ALS. Although ATXN2 interacts directly with RNA, and in ALS pathogenesis there is a crucial role of RNA toxicity, the affected functional pathways remain ill defined. Here, we examined an authentic SCA2 mouse model with *Atxn2*-CAG100-KnockIn for a first definition of molecular mechanisms in spinal cord pathology. Neurophysiology of lower limbs detected sensory neuropathy rather than motor denervation. Triple immunofluorescence demonstrated cytosolic ATXN2 aggregates sequestering TDP43 and TIA1 from the nucleus. In immunoblots, this was accompanied by elevated CASP3, RIPK1 and PQBP1 abundance. RT-qPCR showed increase of *Gm*, *Tlr7* and *Rnaset2* mRNA versus *Eif5a2*, *Dcp2*, *Uhmk1* and *Kif5a* decrease. These SCA2 findings overlap well with known ALS features. Similar to other ataxias and dystonias, decreased mRNA levels for *Unc80*, *Tacr1*, *Gnal*, *Ano3*, *Kcna2*, *Elovl5* and *Cdr1* contrasted with *Gpnmb* increase. Preterminal stage tissue showed strongly activated microglia containing ATXN2 aggregates, with parallel astrogliosis. Global transcriptome profiles from stages of incipient motor deficit versus preterminal age identified molecules with progressive downregulation, where a cluster of cholesterol biosynthesis enzymes including *Dhcr24*, *Msmo1*, *Idi1* and *Hmgcs1* was prominent. Gas chromatography demonstrated a massive loss of crucial cholesterol precursor metabolites. Overall, the ATXN2 protein aggregation process affects diverse subcellular compartments, in particular stress granules, endoplasmic reticulum and receptor tyrosine kinase signaling. These findings identify new targets and potential biomarkers for neuroprotective therapies.

**Key words:**

olivo-ponto-cerebellar atrophy; tauopathy; neuroinflammation; demyelination; leukoencephalopathy;  
steroidogenesis

## Introduction:

Within the dynamic research field into neurodegenerative disorders, the rare monogenic variant SCA2 (Spinocerebellar Ataxia type 2) gained much attention over the past decade, since its pathogenesis is intertwined with the motor neuron diseases ALS/FTLD (Amyotrophic Lateral Sclerosis / Fronto-Temporal Lobar Dementia) and with extrapyramidal syndromes such as Parkinson/PSP (Progressive Supranuclear Palsy). Particularly in the past year, it received massive interest since antisense-oligonucleotides were shown to effectively prevent the disease in mouse models, with clinical trials now being imminent. Still, there is an urgent unmet need to define the molecular events of pathogenesis and to identify biomarkers of progression in SCA2 patients, which reflect therapeutic benefits much more rapidly than clinical rating scales, brain imaging volumetry or neurophysiology measures.

SCA2 was first described as separate entity in Indian patients, based on the characteristic early slowing of eye saccadic movements [222]. A molecularly homogeneous founder population of ~1,000 patients in Cuba made detailed clinical, neurophysiological and pathological analyses possible [5, 8, 45, 137, 161, 167, 218]. The autosomal dominant inheritance was shown to be caused by unstable polyglutamine (polyQ) expansions in the Ataxin-2 gene (*ATXN2*) [153], a stress-response factor conserved from yeast to plants and mammals [7]. The expansion size correlates with younger onset age and faster progression of disease, which manifests with weight loss (later enhanced by dysphagia), muscle cramps and deficient motor coordination [3, 14, 160, 165, 180, 212]. Organisms lacking *ATXN2* do not show immediate adverse effects, and are protected from several neurodegeneration variants with tauopathy, such as ALS/FTLD [2, 12, 44, 163, 189]. However, in view of the association of *ATXN2*-deficiency with progressive obesity, hyperlipidemia and diabetes mellitus [6, 95], it must be asked if such insidiously appearing metabolic excess signs would accompany any neuroprotective treatment by *ATXN2* depletion.

PolyQ expansions in different proteins always cause progressive neurodegeneration, via the formation of protein aggregates. However, each polyQ disease shows a different pattern of pathology in the brain [145, 177], so features of each disease protein around the polyQ expansion determine which neuron populations are preferentially vulnerable. *ATXN2* is strongly expressed in large neurons and normally localized at the rough endoplasmic reticulum [46, 208] or at plasma membrane sites of receptor tyrosine kinase endocytosis [41, 133, 156], due to protein interactions with PABPC1 and SRC, respectively. Possibly via its influence on endocytosis, an inhibition of mTOR signals, fat stores and cell size was shown for *ATXN2* orthologs in yeast, worms and mice [10, 37, 96]. Its role for the ribosomal translation machinery is unclear, since its absence does not change

the polysome profile markedly [96]. During periods of cell damage, ATXN2 relocalizes to cytosolic stress granules where RNA quality control is performed, via recruitment of several nuclear proteins such as TIA1 [155]. ATXN2 promotes stress granule formation and decreases P-body size [132]. The physiological interactions of ATXN2 with proteins and RNAs depend on its C-terminal PAM2 motif, its central Lsm and LsmAD domain, and its alternatively spliced proline-rich domain [35, 97, 175, 232], whereas its pathological aggregation is determined by the N-terminal polyQ domain. Currently it is unclear if ATXN2 aggregation occurs within stress granules, to what degree its physiological interactomes are disturbed in SCA2, and which molecular and functional deficits underlie the progressive neurodegeneration, as putative targets of neuroprotective therapies.

In model organisms such as yeast, flies and mice it was shown that ATXN2 depletion by genetic knockout or mRNA-knockdown protects against the neurotoxicity of TDP43, which causes motor neuron degeneration in ALS and in FTLD. In addition, patient studies showed genetic ATXN2 variants to contribute to the risk of ALS/FTLD [12, 44, 58, 94, 99, 170]. Although the molecular mechanisms of ALS/FTLD are not understood, the crucial role of RNA toxicity in its pathogenesis became plain upon the identification of various ALS/FTLD disease genes, such as the RNA binding proteins TDP43 (encoded by the *TARDBP* gene), FUS, HNRNPA2B1, the RNA-particle transporting KIF5A, the RNA toxicity sensor RIPK1, and other stress response factors such as GRN and SOD1 [200].

We recently generated a new SCA2 mouse model via *Atxn2*-CAG100-KnockIn (KIN) [185] and are using it here to obtain initial insights into spinal cord pathology at the molecular and cellular level. Since human autopsy material is very scarce and usually of insufficient quality for RNA studies, these animals provided the first opportunity to elucidate affected pathways and subcellular compartments, without confounding overexpression artifacts. Given that ATXN2 is an RNA-binding protein and that RNA toxicity is central for ALS pathogenesis, an unbiased global transcriptome survey at two different ages was performed.

Overall, our study defines molecular changes that underlie afferent sensory and efferent motor pathology in spinal cord neurons, and provide mechanistic insights into glial changes. At global transcriptome level we identify the most dramatic progression events. Crucially, we demonstrate a severe deficit in steroidogenesis, which will eventually affect all cell types in nervous tissue. A clear overlap with the known pathomechanisms of ALS, as well as other ataxias and dystonias was observed.

## Materials and methods:

### Animal breeding:

Generation, housing, genotyping and dissection of the *Atxn2*-CAG100-Knock-in mouse [185] and *Atxn2*-Knock-out mice [96] maintained in C57BL/6J background was previously described. The study was ethically assessed by the Regierungspräsidium Darmstadt, with approval number V54-19c20/15-FK/1083.

### Nerve conduction studies, electromyography and quantitative reverse-transcriptase PCR of lower limbs:

Recordings were made with a standard electroneuromyograph apparatus (AlpineBiomed ApS, Denmark) in accordance with the guidelines of the American Association of Electrodiagnostic Medicine. Mice at the age of 9-10 months ( $n = 6$  for mutants and  $n = 7$  for controls) were anaesthetized with 100 mg/kg of ketamine chlorhydrate (Imalgene 1000; Merial, France) and 12 mg/kg of xylazine (Rompun 2%; Bayer HealthCare, Loos, France).

For the tail sensory nerve response, stimulating electrodes placed distally and recording electrodes placed proximally were inserted in the tail 3 cm apart. Sensory nerve responses were elicited by supramaximal square pulses of 0.2 ms duration. Amplitudes ( $\mu\text{V}$ ) from the sensory nerve-evoked responses were measured and averaged, resulting in one averaged amplitude per animal, which was used for statistical analysis. The latency was measured as the time from the given electrical stimulus to the appearance of a sensory nerve response corresponding to the initial deflection from the baseline.

For the nerve conduction studies, compound muscle action potentials (CMAP) were recorded in *gastrocnemius* muscle as described previously [136]. Briefly, CMAPs were elicited by supramaximal square pulses, of 0.2 ms duration, delivered with a monopolar needle electrode to the sciatic nerve at the sciatic notch level. CMAPs were measured by two monopolar needle electrodes inserted in the *gastrocnemius*, and the system was grounded by subcutaneously inserted monopolar needle electrode in the back of the animal. Amplitudes (mV) from the muscle-evoked responses were measured and averaged, resulting in one average CMAP amplitude per animal, which was used for statistical analysis. The latency was measured as the time from the given electrical stimulus to the appearance of a muscle response—the initial CMAP deflection from the baseline.

For electromyography recording, a monopolar needle electrode (diameter, 0.3 mm; 9013R0313, Alpine Biomed ApS, Denmark) was inserted into the tail of the mouse to ground the system. Recordings were made in the

*gastrocnemius* with a concentric needle electrode (diameter, 0.3 mm; 9013S0012, AlpineBiomed ApS, Denmark). Electrical activity was monitored at least 2 min in three different sites. Spontaneous activity was differentiated from voluntary activity by visual inspection.

The RT-qPCR analysis was done in *Tibialis Anterior* and *Soleus* muscles from 4 mice per genotype. Muscles were harvested, rapidly frozen in liquid nitrogen and stored at -80°C until use. Frozen tissues were placed into tubes containing a 5 mm stainless steel bead (Qiagen, Courtaboeuf, France) and 1 ml of Trizol reagent (Life Technologies), and homogenized using a TissueLyser (Qiagen). RNA was prepared from tissue homogenates following Trizol manufacturer's instructions. One microgram of total RNA was used to synthesize cDNA using Iscript reverse transcriptase (iscript<sup>TM</sup> Reverse Transcription Supermix for RT-qPCR, Bio-Rad) as specified by the manufacturer. Quantitative PCR was performed on a CFX96 Real-time System (Bio-Rad) using iQ SYBR Green supermix (Bio-Rad). Three standard genes (H2AC: F-CAACGACGAGGAGCTCAACAAG, R-GAAGTTTCCGCAGATTCTGTTGC/ H2AX: F-TCCTGCCCAACATCCAGG, R-TCAGTACTCCTGAGAGGCCTGC/ H1H2BC: F-AACAAGCGCTCGACCATCA, R-GAATTCGCTACGGAGGCTTACT) were used to compute a normalization factor using Genorm software v3.5. The following primer sequences were used to assess muscle denervation: AchRalpha (F-CCACAGACTCAGGGGAGAAG, R-AACGGTGGTGTGTGTTGATG), AchRbeta (F-GGCAAGTTCTGCTTTTCGG, R-CGTCCGGAAGTGGATGTTCA), AchRdelta (F-CGCTGCTTCTGCTTCTAGGG, R-ATCAGTTGGCCTTCGGCTT) and AchRepsilon (F-CAATGCCAATCCAGACACTG, R-CCCTGCTTCTCCTGACACTC).

Triple immunofluorescence:

Mice were anesthetized (Ketaset 300 mg/kg and Domitor 3 mg/kg by i.p. injection), intracardially perfused and tissues were fixed overnight (O/N) in 4% PFA at 4 °C. Samples were frozen, cut with a cryostat and kept in cryoprotection solution at -20 °C until used.

All immunohistochemistry was done in free-floating 30 µm sections. Sections were washed three times for 10 min each in PBS, blocked (5% goat serum in 0.3% Triton X-100/PBS) at RT for 1 h, and incubated with primary antibodies O/N at 4 °C. Samples were washed three times in PBS and incubated with corresponding secondary antibodies and DAPI at RT for 1 h. After three 10 min washing steps in PBS, samples were mounted on SuperFrost Plus slides with Mountant PermaFluor mounting medium and stored at 4 °C.

Immunocytochemistry was performed as described [185], blocking with 5% BSA for 30 min at RT. Primary antibodies were incubated O/N at 4 °C. Images from the different stainings were done with a Nikon Eclipse TE200-E confocal microscope. In all cases, Z-stacks were processed with ImageJ software [178]. Photoshop CS5.1 was used to generate figures.

Primary antibodies used were: ATXN2 (BD Transduction 611378, 1:50), IBA1 (Wako 019-19741, 1:1000), PABPC1 (Abcam ab21060, 1:100); TDP43 (Abcam ab41881, 1:100), TIA1 (Santa Cruz sc-1751, 1:100). Secondary antibodies used were: Alexa Fluor 488 goat anti-mouse IgG A11029, Alexa Fluor 488 goat anti-rabbit IgG A11034, Alexa Fluor 565 rabbit anti-goat IgG A11079, Alexa Fluor 568 donkey anti-sheep IgG A21099, Alexa Fluor 568 goat anti-rabbit IgG A11036 (all Invitrogen, 1:1000).

#### Quantitative immunoblots:

Protein extraction from tissues and cells was performed with RIPA buffer as described previously [185]. Subsequently, the pellet was re-suspended in SDS lysis buffer (137 mM Tris-HCl pH 6.8, 4% SDS, 20% Glycerol, Proteinase inhibitor, Roche), sonicated and quantified using the Pierce BCA Assay Kit (Thermo Fisher Scientific). The following antibodies were used: ACTB (Sigma A5441, 1:10000), ATXN2 (Proteintech 21776-1-AP, 1:500), CASP3 (Cell Signaling 9665, 1:1000), GFAP (Dako ZO334, 1:2000), GPNMB (Biotechne AF 2330, 1:500), IBA1 (Wako 019-19741, 1:2000), NeuN (Millipore ABN78, 1:1000), PGRN (Biotechne AF 2557, 1:250), PQBP1 (Biomol A302-802A-M, 1:500), RIPK1 (Cell Signaling 3493S, 1:500), TDP43 (Abcam ab41881, 1:1000). The secondary antibodies were: IRDye 680RD goat anti-mouse 926-32220, IRDye 800CW donkey anti-goat 926-32214, IRDye 800CW goat anti-mouse 926-32210, IRDye 800CW goat anti-rabbit 926-32211 (all LI-COR, 1:10000).

#### Quantitative reverse-transcriptase PCR in spinal cord:

Total RNA isolation from mouse tissues (4 WT vs. 4 KO; 6 WT vs. 5 KIN at 3 months; 7 WT vs. 8 KIN at 14 months) and RT-qPCR were done as described previously [185]. *Tbp* was used as the housekeeping gene. The data were analyzed using the  $2^{-\Delta\Delta Ct}$  method [179]. TaqMan assays from Thermo Scientific were used for *Aif1* Mm00479862\_g1, *Ano3* Mm01270409\_m1, *Atxn2* Mm01199902\_m1, *Clqa* Mm00432142\_m1, *Clqb* Mm01179619\_m1, *Clqc* Mm00776126\_m1, *C3* Mm01232779\_m1, *Casp3* Mm01195085\_m1, *Cdr1* Mm04178856\_s1, *Cirbp* Mm00483336\_g1, *Cybb* Mm01287743\_m1, *Cyp46a1* Mm00487306\_m1, *Cyp51a1*



Mm00490968\_m1, *Dcp1a* Mm00460131\_m1, *Dcp1b* Mm01183995-m1, *Dcp2* Mm01264061\_m1, *Dcps*  
Mm00510029\_m1, *Ddx1* Mm00506205\_m1, *Ddx6* Mm00619326\_m1, *Dhcr24* Mm00519071\_m1, *Dhx15*  
Mm00492113\_m1, *Eif5a2* Mm00812570\_g1, *Fmr1* Mm01339582\_m1, *Gfap* Mm01253033\_m1, *Gpnmb*  
Mm01328587\_m1, *Gri* Mm00433848-m1, *Hmgcs1* Mm01304569\_m1, *Hnrnpa2b1* Mm01332941\_m1, *Hnrnpd*  
Mm01201314\_m1, *Irak4* Mm00459443\_m1, *Kcna1* Mm00439977\_s1, *Kcna2* Mm00434584\_s1, *Kif5a*  
Mm00515265\_m1, *Lsm1* Mm01600253\_m1, *Msmo1* Mm00499390\_m1, *Pcbp1* Mm00478712\_s1, *Pcbp2*  
Mm01296174\_g1, *Pcbp3* Mm01149750\_m1, *Pcbp4* Mm00451991\_g1, *Prpf19* Mm01208295\_m1, *Ptbp1*  
Mm01731480\_gH, *Pura* Mm01158049\_s1, *Puf60* Mm00505017\_m1, *Rbfox3* Mm01248771\_m1, *Ripk1*  
Mm00436354\_m1, *Rnaset2a/b* Mm02601904\_m1, *Scn4b* Mm01175562\_m1, *Srrm2* Mm00613771\_m1, *Tacr1*  
Mm00436892\_m1, *Tardbp* Mm00523866\_m1, *Tbp* Mm00446973\_m1, *Tlr3* Mm01207404\_m1, *Tlr7*  
Mm00446590\_m1, *Tlr9* Mm00446193\_m1, *Trem2* Mm00451744\_m1, *Ttbk2* Mm00453709\_m1, *Tyrobp*  
Mm00449152\_m1, *Unc80* Mm00615703\_m1, *Ybx1* Mm00850878\_g1.

BV2 microglia cell line culture:

Murine microglia cell line BV2 [17] was cultured in DMEM supplemented with 10% FBS, 1x L-glutamine and 1x Pen/Strep. BV2 cells were seeded at  $5 \times 10^4$  cells/well on poly-D-lysine (0.1 mg/mL) coated glass slides in a 12-well plate O/N and then were stressed with 0.25 mM Sodium Arsenite (NaArs, S7400-100G Sigma-Aldrich) for 15 min. Cells were fixed with 4% PFA at RT for 20 min, permeabilized with 0.1% Triton X-100/PBS for 20 min and washed three times with DPBS before staining.

Global transcriptomics by Clariom D microarrays:

As recommended, 1  $\mu$ g of RNA was pre-treated with DNase amplification grade (Invitrogen). The GeneChip™ WT PLUS Reagent Kit (Applied Biosystems) was used to generate single-stranded cDNA (ss-cDNA) following the manufacturer's instructions. The ss-cDNA was fragmented and labeled right before the hybridization to a Clariom D Array (Thermo Fisher). The arrays were scanned with the Affymetrix GeneChip Scanner and the data were processed with the Transcriptome Analysis Console (TAC) 4.0.1 (Applied Biosystems) using default algorithm parameters.

STRING protein-protein interaction bioinformatics:

The web-server <https://string-db.org/> was used in 2019 with version 11.0.

Quantification of cholesterol pathway intermediates by gas chromatography mass spectrometry using selective ion detection methodology:

The procedures were carried out as previously described [194].

Statistics and graphical visualization:

Statistical tests were performed as unpaired Student's t-test with Welch's correction using GraphPad Prism software version 7.02. Figures display the mean and standard error of the mean (SEM) values. Significance was assumed at  $p < 0.05$  and highlighted with asterisks:  $p < 0.05$  \*,  $p < 0.01$  \*\*,  $p < 0.001$  \*\*\*,  $p < 0.0001$  \*\*\*\*.

## Results:

### *Neurophysiology of lower limbs finds mainly axonal sensory neuropathy as earliest deficit.*

The initial characterization of our novel *Atxn2*-CAG100-KnockIn (KIN) mouse mutants had demonstrated a peripheral motor weakness upon forelimb grip strength analysis in comparison to sex-/age-matched wildtype (WT) controls from the age of 11 months onwards [185]. To elucidate if motor neuron denervation and sensory neuropathy are early features within the locomotor phenotype of this SCA2 model as in patients, neurophysiological analyses by hindlimb electroneurography (ENG) were now performed at the age of 9-10 months, when a weight reduction is already evident in males [185]. Sensory potentials showed significant reductions of amplitude (to ~60%), conduction velocity (SNCV, to ~80%), and, for males, minimal intensity threshold (to ~70%) (Figure 1). In contrast, for the compound motor action potentials (CMAP) there was no significant change of velocity, amplitude, minimal and maximal intensity threshold at this disease stage. Upon electromyography (EMG) routines, no muscle denervation potentials such as fasciculations or fibrillations were detected (Suppl. Figure S1A). The reverse-transcriptase quantitative real-time polymerase chain reaction (RT-qPCR) analysis of Acetylcholine Receptor (AChR) alpha / beta / delta / epsilon subunit mRNA expression in the *Tibialis Anterior* and *Soleus* muscle homogenates showed no significant reduction (Suppl. Figure S1B). These observations indicate a loss of some fast-conducting axons and of myelin wrapping that reduce the perception of slight stimuli as initial dysfunction in peripheral nerves, before the advent of later motor deficits. In SCA2 patients, somatosensory denervation of lower limbs is indeed an early phenomenon [169, 212], while the motor neuron pathology at disease onset affects primarily the face, neck and arms [45, 121]. Overall, these data demonstrate sensory neuropathy, but not yet motor denervation of KIN hindlimbs at the age of 9-10 months.

### *Progressive sequestration of PABPC1 together with nuclear TDP43 and TIA1 proteins into cytosolic ATXN2 aggregates in spinal motor neurons.*

To further investigate the reduced grip strength in the *Atxn2*-CAG100-KIN mice from the age of 11 months onwards, the spinal cord pathology was examined by histology. Previous analyses of cerebellar Purkinje neurons in 2-year-old mice with KnockIn of a *Atxn2*-CAG42-expansion, a frequent size among SCA2 patients that triggers clinical onset at ages around 30 years, demonstrated a pathological aggregation process where cytosolic ATXN2 sequesters its direct interactor protein PABPC1 [poly(A)-binding-protein-cytoplasmic-1] into insolubility [35, 185]. In an effort to test this observation in our new *Atxn2*-CAG100-KIN mice for spinal cord

motor neurons, triple immunofluorescence was employed to study animals at the early adult age of 3 months, at the age of initial weight deficits around 6 months, and the prefinal age of 14 months. As shown in Figure 2, the yellow-stained colocalization of green ATXN2 signals and red PABPC1 signals within cytosolic clumps were clearly visible at 6 months and became more numerous by 14 months. Additional detection of nuclear TDP43, which is known to interact with ATXN2 indirectly via RNA-association within short-lived stress granules [44, 236], also demonstrated colocalization within the cytosolic ATXN2 aggregates, albeit only at later age to a massive degree (Figure 2). This observation provides evidence of progressive spinal motor neuron affection leading to a motor neuropathy in this SCA2 mouse model over time. A similar pathological relocation from a nuclear position to the cytosolic aggregates was also observed for the RNA-binding protein TIA1 (Suppl. Figure S2), an established marker of stress granules [47]. As a neuropathological diagnostic hallmark of spinal motor neuron affection in ALS, the nuclear depletion and cytoplasmic accumulation of TDP43, TIA1 and other RNA-binding proteins is probably reflecting a crucial disease mechanism [31, 88, 103]. The TDP43 mislocalization to the cytosol was already reported for SCA2 patients in lower and upper motor neurons, cerebellar Purkinje cells, brainstem neurons and other neuron populations [11, 44, 206], so the animal model provides a faithful reflection of the temporal development and the spatial distribution of the human pathology.

*Cascade of molecular events upstream from TDP43 mislocalization is mirrored in spinal cord.*

The importance of TDP43 mislocalization for ALS and FTLN has prompted numerous studies into the underlying molecular events, so we investigated whether the pathomechanisms upstream from TDP43 aggregation can also be found in the *Atn2*-CAG100-KIN spinal cord homogenates. It was reported that ATXN2 expansions trigger stress-dependent activation of caspase-3 (CASP3), which is responsible for the proteolytic C-terminal cleavage and cytoplasmic retention of TDP43 [67]. To test whether this pathogenesis feature is present, and if it is dependent (i) on the physiological function of ATXN2, (ii) on the polyQ expansion or (iii) on disease progression, we studied spinal cord from mice with *Atn2*-KO versus *Atn2*-CAG100-KIN at the presymptomatic age of 3 months versus the preterminal age of 14 months. Indeed, quantitative immunoblots demonstrated an elevated abundance of TDP43 (1.6-fold) and CASP3 protein (1.8-fold) only in KIN mice at the old age, while their mRNA retained normal expression (Figure 3A/B). Thus, the elevated abundance of both proteins occurs only in polyQ expansion tissue during the progressive aggregation process, in good agreement with our immunohistochemical demonstration of TDP43 deposits in the cytosol. At the age of 14 months the neuronal mass appeared already reduced below >0.6-fold (as estimated via quantitative immunoblots of the

marker NeuN, Figure 3A), in parallel to a similar 2-fold increase of astrogliosis (marker GFAP, Figure 3A and 3B) and together with substantial microgliosis (marker IBA1, encoded by *Aif1* mRNA, Figure 3B).

Furthermore, mutations of progranulin (PGRN, encoded by *Grn* mRNA) were demonstrated in FTLN individuals to cause cytoplasmic TDP43 mislocalization [154]. The depletion of progranulin also leads to accumulation of TDP43 fragments, in a caspase-dependent manner [239]. Intracellular PGRN gives rise to processed secreted isoforms. They stabilize the protease CTSD in lysosomes and extracellularly to stimulate axonal outgrowth [13]. The absence of PGRN conversely acts as trigger of synaptic pruning by microglia via the complement membrane attack complex [111]. It was therefore interesting to observe significantly increased *Grn* mRNA levels in 14-month-old KIN spinal cord (Figure 3C/D) as a quite specific response to the TDP43 pathology, possibly representing a compensatory effort.

PGRN abundance is modulated in response to RIPK1-mediated phosphorylation [118], whose activation can sense viral or toxic nucleotides via the toll-like receptor TLR3 [93, 129], drives pro-inflammatory necroptosis [234], and is implicated in ALS [81, 230]. Consistent with these reports, enhanced RIPK1 protein levels were observed in the spinal cord of *Atxn2*-CAG100-KIN mice, possibly with a 1.4-fold abundance already at 3 months, but achieving significance only for the 1.5-fold increase at the age of 14 months (Figure 3C/D). The *Ripk1* mRNA levels showed a clearly significant increase to almost 2-fold at the age of 14 months.

Toll-like-receptor (TLR)-triggered activation of microglial cells, as well as inflammatory lysis of synapses via neuronal deposition of complement C1q and C3 factors on their membranes, were carefully documented in ALS spinal cord tissue [29, 143]. Again, in the 14-month-old spinal cord of *Atxn2*-CAG100-KIN mice there were strong transcriptional inductions for *Tlr3*, *Tlr7*, *Tlr9*, *C1qa*, *C1qb*, *C1qc* and *C3* (Suppl. Figure S3A). The particularly strong induction of *Tlr7* as sensor (at endosomes or lysosomes) for toxic single-stranded RNA and miRNA (3.5-fold), in comparison to *Tlr9* as sensor of single-stranded DNA sequences (2.3-fold) and *Tlr3* as sensor of double-stranded RNA (1.3-fold) underlined and elucidated the RNA-toxicity [68, 74, 100] present in the spinal cord tissue of our SCA2 model. It is interesting to note that Ataxin-2 domains were reported to play a role in the miRNA-mediated mRNA degradation [90] and to interact with the microRNA effector DDX6 to mediate quality control of mRNAs [4, 120, 132, 198].

Finally, it is known that non-expanded polyQ-domain containing proteins are being recruited into the aggregates formed by expanded ATXN2 or expanded ATXN3 [149, 207]. Other proteins also bind specifically to expanded polyQ domains, e.g. PQBP1 (Polyglutamine binding protein 1) as a sensor of viral or toxic nucleotides within

the innate immunity pathway of brain cells [224, 231]. Indeed, in 14-month-old *Atxn2*-CAG100-KIN spinal cord a significant accumulation was documented (Suppl. Figure S3B). Overexpression of PQBP1 in transgenic mice results in a loss of spinal motor neurons as well as a loss of cerebellar Purkinje neurons [135]. Deletion mutations in PQBP1 affect the turnover of FMRP (fragile-X mental retardation protein) in neuronal RNA granules and trigger synaptic dysfunction [238].

Jointly, these analyses of protein abundance or mRNA expression demonstrate a cascade of abnormal molecular events, where interactions of toxic RNAs affect endosomal TLRs and cytosolic PQBP1, which act as pathology sensors together with RIPK1, affecting PGRN-dependent neurite growth and CASP3-modulated TDP43 aggregation. This molecular cascade was defined for the motor neuron pathology in ALS and it is observed also in the spinal cord of our SCA2 model at advanced stages.

*Activated microglia contains ATXN2 aggregates and is mainly pro-inflammatory, possibly also by cell-autonomous affection.*

Upon close inspection of spinal cord immunohistochemistry, in the 14-month-old *Atxn2*-CAG100-KIN mice some ATXN2 aggregates appeared positioned outside motor neurons. Triple immunofluorescence staining showed them to colocalize with the microglia marker IBA1 and these microglia cells showed pronounced activation with larger cell size and thicker branches (Figure 4A). Within their cytoplasm, beyond the ATXN2 aggregates also a diffuse ATXN2 staining was visible, compatible with the known stress-dependent induction of Ataxin-2 expression [96]. Indeed, publically available RNAseq findings in diverse brain cell populations from murine and human samples (<http://brainrnaseq.org/>) documented Ataxin-2 transcript expression to be similar in neurons and astrocytes, while Ataxin-2 transcript expression in oligodendrocytic, microglial and endothelial cells ranges at 30-50% in comparison to neurons. To assess this issue at the protein level, the microglial cell line BV2 was immunocytochemically stained for ATXN2 and its direct interactor protein PABPC1, while exposure to oxidative stress via NaArs administration was used to trigger the formation of characteristic stress granules, with the relocalization of ATXN2 with PABPC1 there. The immunofluorescent signals confirmed the typical diffuse cytosolic pattern for both proteins that changes to multiple granules with the expected delay (Figure 4B). These data indicate that microglia would not only phagocytose ATXN2 aggregates that were produced by neurons, but may also suffer in cell-autonomous manner from the RNA toxicity triggered by the ATXN2 mutation. To address the question whether the activated microglia cells in old KIN spinal cord are anti-inflammatory protective (M2 differentiation) or rather show the pro-inflammatory toxic properties (M1 differentiation) that

were documented in ALS [56], expression of the phagocytosis factor TREM2 and its adaptor DAP12 (encoded by *Tyrobp*) as M2 markers, as well as the common downstream TLR signaling element IRAK4 and the respiratory burst oxidase subunit NOX2 (encoded by *Cybb* mRNA) as M1 marker [25, 85, 147, 240] was quantified by RT-qPCR. While *Trem2* and *Tyrobp* showed about 3-fold induction and *Irak4* exhibited 1.5-fold induction, the superoxide-production enzyme *Cybb* was elevated 7-fold (Suppl. Figure S4), indicating a massive pro-inflammatory activity of microglial cells.

Altogether, the strong microglial activation in spinal cord at prefinal stages does not only serve neuroprotective functions via ATXN2 aggregate phagocytosis, but shows prominent toxic pro-inflammatory features, possibly via cell-autonomous sensitization of microglia to RNA toxicity caused by the stress-augmented expression of expanded ATXN2.

*Expression profiles of spinal cord at incipient versus preterminal disease stage consistently show increases for RNA-binding proteins and bioenergetics markers, decreases for tyrosine kinase signaling factors, synapse/axon components, and cholesterol biosynthesis enzymes.*

In view of the crucial role of ATXN2 and stress granules for RNA quality control, we surveyed the global transcriptome with Clariom D microarrays containing >214,000 spotted oligonucleotides, which represent almost every exon from coding mRNAs, microRNAs and long non-coding RNAs. This was first done in spinal cord tissue from animals at the age of 10 weeks when initial deficits of weight and spontaneous motor activity become apparent [185], and then again at the preterminal stage of 14 months when maximal expression dysregulations are expected but may already be confounded by altered cellular composition. Figure 5 illustrates the general approach, filtering criteria and a total overview of significant anomalies. It is important to state that we filtered and assessed all 1.2-fold expression dysregulations with nominal significance, if they were components of a pathway that showed enrichment after correction for multiple testing. The reasoning behind the screening of so subtle changes comes from research into Parkinson's disease (PD), where 2-fold dosage increase of the disease protein alpha-synuclein was shown to trigger disease onset at ages of 30 years, 1.5-fold increase causes onset around 50 years, and 1.3-fold increase starts disease after 70 years of age [19, 34, 191]. The survey of 1.2-fold global transcriptome dysregulations in a PD mouse model correctly discovered neuroinflammatory changes as initial molecular pathology, which were later found to be crucial for a successful rescue [193, 205]. Given that ATXN2 mutations also trigger mitochondrial dysfunction as in PD, and that SCA2 may manifest with

a Parkinsonian phenotype [142, 181, 186, 187, 223], we assessed here if distortion of such pathways becomes relevant by subtle dysregulations at several points.

At incipient disease stage of the *Atxn2*-CAG100-KIN mouse, a 1.2-fold expression change was observed for 1,699 downregulations versus 2,887 upregulations; at preterminal age, the number of 1,514 downregulations appeared quite similar, but an increased number of 4,725 upregulations reflected the disease progression. The individual factors in their interaction clusters were visualized in STRING diagrams (Suppl. Fig. S5). Initially the upregulations were prominent (Suppl. Fig. S5A) for the ATXN2 interactor *Pabpc1* mRNA, together with various other translation initiation and spliceosomal factors, in parallel to upregulations of acetylation and mitochondrial factors. This was accompanied by initial downregulations (Fig. S5B) for receptor tyrosine kinases that signal via the ATXN2-interactors SRC and GRB2, together with depletions for their downstream effectors, various MAP kinases and CAM kinases. Downregulations included pathway enrichments for potassium channels, synapse/axon factors, and cholesterol biosynthesis enzymes (statistics in Suppl. Table S1).

To reduce complexity at preterminal stage, only 2-fold expression changes were evaluated by STRING. The strong upregulations included immune defense and lysosome components, beyond the RNA-binding and bioenergetics proteins (Suppl. Fig. S5C). The strong downregulations again reflected deficits of potassium channels, synapse/axon factors, and cholesterol biosynthesis enzymes (Suppl. Fig. S5D; statistics in Suppl. Table S2).

#### *Pathway enrichments in the Transcriptome Analysis Console relate to ATXN2 interactome*

Bioinformatics via the Affymetrix Clariom Transcriptome Analysis Console (TAC) recognized enrichments for apparently diverse pathways at incipient stage (Suppl. Figure S6) and preterminal stage of disease (Suppl. Figure S7). As common denominator, all these pathways reflect progressive expression adjustments at the diverse sites of physiological ATXN2 localization in young unstressed tissue: ATXN2 was previously shown to interact with the EGF / insulin receptor and downstream AKT/MAPK signaling [41, 95, 133], to inhibit the mTORC1 growth complex in three species [10, 37, 96], to reside at the endoplasmic reticulum (ER) [36, 208] where cholesterol biosynthesis and calcium storage occur [62, 65, 107, 209], to modulate ribosomal mRNA translation [46, 138, 175], to interact with actin/actinin [105, 174] and to modulate adipogenesis [95, 185]. Thus, both transcriptome profiles are compatible with the concept that expanded ATXN2 irritates its various subcellular interactomes and triggers many gradual expression adaptations that may compensate most, but not all dysfunctions. Apart from



RNA toxicity, the disruptions of cholesterol biogenesis and calcium dynamics at the ER have been proposed as crucial disease mechanisms in ALS [15, 210].

*Expression profiles of spinal cord at preterminal disease stage reveal affected RNA toxicity factors, ALS-ataxia-dystonia genes, as well as cholesterol biogenesis repression.*

Pathway analyses did not highlight and expression anomalies for the typical stress granule factors, even in the presence of old age and inflammation stress. Despite several publications implicating ATXN2 in micro/non-coding RNAs and implicating TDP43 in splicing of RNAs [120, 203], no strong progression effects were observed for non-coding or alternatively spliced RNAs at preterminal age. Thus, efforts were made to survey individual factors that are prominent, due to their massive dysregulation or through their known roles for disease pathogenesis.

The strongest single effect at incipient stage was on *Etmpl* mRNA (-3.9 fold, false discovery rate FDR q-value 0.0795), which encodes an enzyme responsible for the breakdown of membrane phospholipids to acetaldehyde. The strongest effects at preterminal stage included increases for microglial (*Gpnmb*, 261-fold,  $q=9e-05$ ) and lysosomal activation (*Atp6v0d2*, 9-fold,  $q=0.01$ ), versus reductions for the cholesterol biosynthesis enzyme *Hmgcs1* (-6.2-fold,  $q=0.01$ ), the ataxia disease gene *Cdr1* (-5.3-fold,  $q=0.01$ ), the ER-Golgi traffic coatmer factor *Copg2os2* (-4.5-fold,  $q=0.01$ ), and the action potential modulator *Scn4b* (-4.7-fold,  $q=0.05$ ).

In additional bioinformatics efforts to elucidate molecular underpinnings of prefinal pathology, volcano plots were generated that illustrate the significance and fold-change for prominent factors. Key factors in RNA toxicity such as *Rnaset2* and *Tlr7* were upregulated (Suppl. Fig. S8A); ALS disease genes like *Gm* and *Hnrmpa2b1* were also upregulated, while *Kif5a* showed a downregulation (Suppl. Fig. S8B); among the ataxia disease genes, two enzymes responsible for very-long-chain fatty acid elongation (*Elovl4/5*) and three potassium channels (*Kcnc3*, *Kcnj10*, *Kcna1*) were downregulated (Suppl. Fig. S8C); we have previously reported the deficit of *Elovl4/5* expression and of its metabolic product C24 sphingomyelin in the CAG100-KIN mouse, as well as the loss of C24 sphingomyelin in the cerebellum of a SCA2 patient [184]. Interestingly, in the CAG100-KIN spinal cord expression profile (Suppl. Fig. S8C), significance was just achieved for the downregulation of *Ttbk2*, as a factor with causal role in tauopathies and TDP43 phosphorylation [201].

*Strongest progression of dysregulation for cholesterol biosynthesis and synapse/axon factors.*

Next, we attempted to identify molecular biomarkers of disease progression by selecting the  $\geq 1.2$ -fold expression changes in 10-week-old spinal cord, which evolved into  $\geq 2.4$ -fold dysregulations in the 14-month-old tissue. Table 1 shows the 51 factors that were defined by this approach. They were studied in great detail with respect to pathway enrichment, partially validated at RT-qPCR and immunoblot level, and assessed regarding enzyme metabolic effects. We prioritized them in view of the high importance of progression markers for the understanding of pathogenesis and the evaluation of neuroprotective therapies.

Table 1 uses red color to highlight the novel and crucial observation that factors of cholesterol metabolism are clustering among the strongest repression effects. This was evident upon automated STRING bioinformatics (Suppl. Fig. S5E; Suppl. Table S3). In addition, the androgen- (a cholesterol-derived hormone) responsive *Klk6* expression was downregulated [233]. Similarly, the *Etmpl* mRNA was decreased, and its activity is triggered by corticosteroids, which are derived from cholesterol [48]. It is noteworthy that the mRNA encoding the enzyme *Nat8l* is downregulated as well, reflecting the insidious depletion of the abundant brain metabolite N-acetyl-aspartate (generated in neuronal mitochondria to shuttle metabolic substrates for oligodendroglia myelination), as an established imaging biomarker of advanced disease in SCA2 patients and in our mouse model [185]. Together, these findings suggest progressive and prominent deficits in acetyl-CoA supply, membrane phospholipid metabolism, myelin lipid synthesis, cholesterol biogenesis and hormone homeostasis.

*Quantification of cholesterol biogenesis pathway intermediate metabolites confirms significant deficits that cannot be compensated*

We wondered whether the cholesterol pathway dysregulation is a primary event that contributes to neurodegeneration or whether it is secondary, a consequence of membrane breakdown. The transcriptional downregulations of various enzymes in cholesterol biogenesis and turnover were confirmed by RT-qPCR (Suppl. Fig. S9). Are the mRNA levels of these enzymes repressed, because excessive amounts of free cholesterol are available in the aftermath of synapse and axon loss? Or is this transcript deficit responsible for cholesterol depletion? To assess this question, the intermediary metabolites of cholesterol metabolism were quantified by gas chromatography- mass spectrometry using selective ion detection methodology in spinal cord tissue at the age of 14 months. Conversely to the significant increase of cholesterol in *Atn2*-KO mouse blood [95], a significant 0.76-fold decrease of cholesterol was documented (Suppl. Table S4). Also its degradation products 24OH-cholesterol and 27OH-cholesterol showed significant 0.80-fold and 0.60-fold deficits,

respectively (Suppl. Table S4). Other known deficits of cholesterol biogenesis such as the Smith-Lemli-Opitz syndrome or desmosterolosis have a phenotype that includes mental retardation due to brain atrophy, with the membrane cholesterol deficit being partially compensated by the integration of precursor metabolites [98, 151, 176, 225]. In contrast, in our SCA2 mouse model the precursor metabolites showed massive deficits at multiple steps in both the Bloch pathway and the Kandutsch-Russell pathway, with 0.08-fold reduction for lanosterol at the beginning of post-squalene synthesis, and 0.09-fold reduction for lathosterol towards the end of the biosynthesis cascade (Figure 6). Comparisons between the cholesterol enzyme expression deficits listed Table 1 and these metabolite quantifications demonstrate an excellent correlation of cholesterol precursor metabolite deficits (Figure 6). Furthermore, the significant gradual downregulations of the biosynthesis enzymes *Sqle*, *Sc5d*, *Nat8l*, *Etmpp1* and *Plcx2* indicate that cholesterol synthesis is affected already in the pre-squalene pathway and that the basal homeostasis of Acetyl-CoA and membrane phospho-lipids is also altered. These findings are in good agreement with global proteome profiles of *Atxn2*-null organisms, which demonstrated a prominent alteration of the breakdown of fatty acids and amino acids to Acetyl-CoA within mitochondria of mice, and demonstrated a prominent affection of the citric acid cycle in yeast [122, 182], jointly emphasizing a metabolic role for ATXN2. Altogether, expression profiles at initial and late disease stages are corroborated by lipid quantification studies, pointing to significant deficiencies of cholesterol and its precursors in the nervous tissue as a primary event of pathogenesis, which occurs so early and progresses so strongly that this pathway can serve as a sensitive and specific read-out in therapeutic trials.

#### *Progressive downregulation of further factors that mirror specific neuron pathways*

Several calcium-binding factors with selective expression in different neuron populations seemed relevant in Table 1 and were highlighted in beige color: The progressive decrease of *Calb2* mRNA encoding Calretinin in cerebellum mirrors specifically the GLUergic parallel fibers, whereas the depletion of Parvalbumin (encoded by the *Parva* gene) is a marker of GABAergic Purkinje neurons. Both are lost from ALS spinal cord tissue [26, 71, 117, 228]. The parallel reduction of *Clgn* mRNA encoding the endoplasmic reticulum chaperone Calmegin represents cerebellar deep neurons and spinal motor neurons, according to the Allen mouse spinal cord *in-situ* hybridization data. These observations suggest that the degeneration affects several neural projections in parallel rather than in a hierarchical time-course.

The strongest progression marker in Table 1 was the decreased expression of the *Klk6* gene, which contains a purine repeat similar to the Friedreich ataxia gene and shows dysregulated expression during the neurodegenerative process of Alzheimer's disease [190]. Similarly, the dysregulation of *Ina* expression and of *I133* in Table 1 for the CAG100-KIN were similarly reported for ALS [70, 106]. The progressive decrease of *Unc13c* mRNA levels in Table 1 reflects the specific motor deficits of these mice, in view of its key role in cerebellar parallel fibers for fast reflexes and motor learning [9, 128]; the depletion of *Slc6a11* encoding the GABA-transporter-3, and of *Gabrb2* encoding the GABA-A-receptor-beta-2, in CAG100-KIN clearly mirrors the dysfunction of GABA-ergic signaling in the spinal dorsal horn and in cerebellar Purkinje cells [63, 86]; the deficiency of *Itih3*-encoded protein complexes was documented in Table 1 and occurs similarly after denervation, leading to diminished exploration and anxiety-like behavior in mice [21, 61, 134].

*Gradual expression anomalies for neurodegenerative disease genes Cdr1, Kcna2, Kif5a and Ano3 are prominent.*

As novel insights into the progressive spinal cord pathology in this SCA2 model, Table 1 also highlights progressively reduced expression for several known neurodegeneration genes: firstly, *Cdr1* (encoding Cerebellar Degeneration Related Protein 1, aka CDR62 or CDR34 or Yo-antigen) downregulation relates to its well-known autoimmune depletion as a cause of paraneoplastic ataxia [18] - it is interesting to note that *Cdr1* expression is induced by the myelination factor Prion protein [172]; secondly, the Spinocerebellar Ataxia gene and voltage-gated potassium channel *Kcna2*, which is preferentially expressed in afferent synapses onto the degenerating neurons [73, 229]; it is interesting to note that the parallel reduction of *Kctd3* and *Kctd9* affects two factors with potassium channel tetramerization domains; thirdly, the ALS disease gene *Kif5a* [20, 130] and its interactors *Kif5b* and *Kif5c*, which encode factors of axonal transport; *Kif5a* clusters with the progressive dysregulations of *Uhmk1* (aka Ser/Thr-Protein kinase KIS) and *Ina* (aka internexin neuronal intermediate filament) in Table 1, since these factors relate to ribonucleoprotein and stress granule transport [24, 52, 108]. In the same context, the progressive expression downregulation of *Hecw1* seems relevant, since this ubiquitination enzyme is responsible for the degradation of the ALS disease protein SOD1, is sequestered into the cytosolic aggregates in ALS neurons, and its mutation leads to ALS-like phenotypes in mouse [123, 237]; fourth, the downregulation of *Ano3* is important in view of its impact on tremor and dystonia [30, 196]; similarly, the reduced expression of *Gnal* encoding the G-protein G(olf) alpha, and of *Rgs7bp* encoding R7bp as general regulator of G-protein signaling appears relevant, in view of *Gnal* mutations triggering dystonia type 25 and the key role of R7bp in spinal

afferents [51, 104, 141]; fifth, the insidious reduction of *Scn4b* mRNA seems relevant, given that *Scn4b*-null mice show motor coordination and balance deficits [158], that *Scn4b* expression depends on GABA-A signaling [150] and that *Scn4b* depletion was also observed in the striatum affected by polyglutamine-neurotoxicity due to Huntington's disease mutation [139]. In view of the importance of some of these factors, validation of their dysregulation expression was done by RT-qPCR (Suppl. Fig. S9).

#### *Insidious downregulation of Eif5a2 and Unc80 as factors within the interactome of ATXN2*

It was particularly interesting to observe the depletion of *Eif5a2* transcripts encoding a translation initiation factor, given that ATXN2 is associated to PABPC1 in the ribosomal translation complex [35, 46, 96, 208], but its exact role was never understood. The EIF5A protein is the only factor containing the unusual conserved amino acid hypusine, was reported to aid translation of polyproline-motifs, modulates co-translational ER translocation, promotes stress granule assembly and mRNA decapping, is key for pancreatic beta-cell inflammation in diabetes mellitus, and mediates the effect of polyamines on neuronal process extension as well as survival via control of autophagy-controlling factors TFEB and ATG3. EIF5A also regulates mitochondrial respiration via initiation from alternative start codons. In addition, EIF5A restricts RNA virus infections [22, 55, 64, 78, 101, 110, 112, 113, 125, 148, 152, 164, 235]. It is important to note in this context that ATXN2 is cleaved by Coxsackie-virus and Polio-virus, during their optimized efforts to diminish host cell defenses against invading viral RNA [84]. Therefore, we used RT-qPCR to systematically assess expression dysregulation triggered by ATXN2 mutations in cerebellum as an independent validation effort, examining various factors that are involved in the RNA translation and shuttling, versus degradation of toxic viral RNA (Suppl. Table S5). Indeed, this approach confirmed that independent from polyQ expansions, altered ATXN2 functions lead to significant expression downregulations for *Eif5a2*. A similar downregulation was observed for the RNA decapping enzyme *Dcp2* that co-localizes with the PABPC1 interactor TOB1 in P-bodies, but unlike ATXN2 and PABPC1 is not sequestered to viral production factories around lipid droplets [4, 188]. The concept of excessive exposure to toxic RNA was further substantiated, when RT-qPCR experiments validated microarray data in 14-month-old *Atxn2*-CAG100-KIN spinal cord on the 1.6-fold transcriptional upregulation of *Rnaset2* (Suppl. Fig. S9). This ribonuclease with localization in lysosomes is responsible for the degradation of mitochondrial RNA and mitochondria-associated ribosomal RNA [69, 77]. Mutations in *Rnaset2* cause neuroinflammation in a syndrome with cystic leukoencephalopathy [75]. The age-progressive release of toxic RNA and DNA from dysfunctional mitochondria was recently shown to constitute a key stress for innate immune defenses and for the neuroinflammation underlying Parkinsonian brain atrophy [38, 193, 226].

Another factor at a physiological site of ATXN2 localization that showed steady expression downregulation during the neurodegenerative process was UNC80, which is activated by the tachykinin receptor 1 (TACR1) via SRC as an interactor of ATXN2 [41, 109, 133]. TACR1 binds substance-P selectively for the sensory perception of itch, pain and inflammation. It is abundant in the spinal cord dorsal horn neurons but is also a component of microglia sensing [28, 241]. Tachykinin levels in the cerebrospinal fluid of ALS patients have been found elevated [119]. Furthermore, TACR1 accumulation was documented in the SOD1 mouse model of ALS and its pharmacological inhibition was found to be neuroprotective [23, 102, 192]. In the *Atxn2*-CAG100-KIN spinal cord, a significant decrease of *Tacr1* mRNA levels was evident already at the exceptionally early age of 3 months, and remained similarly strong until the age of 14 months (Suppl. Fig. S9). This observation provides a possible molecular correlate for our phenotypic finding that sensory pathology precedes motor pathology in SCA2. Furthermore, the strongest upregulation among all transcripts (~45-fold upon RT-qPCR, Suppl. Figure S9) concerned the Glycoprotein NMB (aka osteoactivin or Hematopoietic Growth Factor Inducible Neurokinin-1 = HGFIN), encoded by *GpnmB*. This neural-expressed glycoprotein interacts with substance-P, it activates SRC signaling, its depletion reduces neuropathic pain, and it can be induced by lysosomal stress also in microglia [53, 76, 114, 157]. It is highly relevant to note that GPNMB has a neuroprotective role for TDP43 toxicity or ALS [127, 199]. GPNMB was also described as neurodegeneration biomarker in Alzheimer's, Parkinson's, Gaucher's disease and PLOSL leukodystrophy [79, 82, 124, 126, 173].

## Discussion:

We have previously generated the novel *Atxn2*-CAG100-KnockIn mouse and shown for the cerebellum that (i) the temporal evolution of locomotor deficits and progressive atrophy, (ii) the spatial distribution of its pathology, and (iii) the neurochemical anomalies upon brain imaging faithfully reflect the known features of SCA2 [185]. For the spinal cord pathology as well, the current study confirms that this mouse mutant represents an authentic SCA2 model: Neurophysiologically, the distinctive features of SCA2 patients around clinical manifestation include an early sensory neuropathy by predominantly axonal lesion with signs of myelin damage [16, 146, 166, 168, 169, 211, 212], before the degeneration of lower and upper motor neurons starts with cranio-cervical preference [214-216, 219, 220]. Similarly, the *Atxn2*-CAG100-KIN showed sensory neuropathy as earliest peripheral manifestation of disease at the age of 9-10 months. As a pathological hallmark of spinal motor neuron affection, the progressive aggregation of TDP43, ATXN2 and other stress granule proteins was observed in the nervous tissue of human SCA2 [44, 89, 167, 183], and is also now documented in this mouse model. In view of the rarity of SCA2 autopsies, no human expression profiles became available until now that could elucidate the pathological mechanisms in the affected tissue. Thus, the *Atxn2*-CAG100-KIN mouse provided a unique opportunity to understand the spinal pathology of SCA2, and the molecular insights documented here are completely novel.

Overall, the pathway enrichments demonstrated a decreased expression for synaptic and axonal factors as well as cholesterol enzymes. This loss occurs in parallel to astrogliosis, as expected. But interestingly, our data represent the first report that enhanced expression of lysosomal factors and microgliosis are prominent at late disease stages. Mechanistically, the activated microglia may be partially due to the presence of ATXN2 aggregates, which are presumably extruded from neurons and internalized by phagocytosis, but this may also be exacerbated by the robust expression of expanded ATXN2 in stressed microglia cells, as a cell-autonomous trigger.

From the expression profiles in the KIN spinal cord, two molecular cascades can be assembled as plausible scenarios, both culminating in microgliosis. Firstly, as a putative correlate of the sensory neuropathy the transcript expression of several key factors in afferent signaling changed. The downregulation of the itch/pain-related Substance-P receptor *Tacr1* reached significance particularly early at the age of 3 months. The *Tacr1*-dependent neuronal excitability factor *Unc80*, which encodes a scaffold for the ATXN2-interactor SRC, was identified as one of the best biomarkers for disease progression. The afferent excitability problem seems to involve altered potassium homeostasis, in view of the conspicuous expression dysregulation of several presynaptic K<sup>+</sup> channels (Ataxia disease genes *Kcnj10*, *Kcnc3*, *Kcna1* in Suppl. Fig. S7C; *Kcna2* with K<sup>+</sup>-

channel tetramerization factors *Kctd9* and *Kctd3* in Table 1). This observation is in good agreement with a previous report that impaired excitability of Purkinje neurons in a SCA2 mouse model was rescued by modulation of K<sup>+</sup> dependent hyperpolarization [43]. Also the expression dysregulation of *Ano3* and *Gnal*, two disease genes responsible for dystonia and tremor, may be caused within the same sensory pathway. In this context, it is important to consider that SCA2 mutations always trigger intention tremor and may have a clinical presentation mainly with tremor or dystonia [32, 50, 92, 116]. At late stage, the strongest upregulation among all transcripts concerned the Substance-P interactor *Gpnmb*, which can be strongly induced in microglia cells by lysosomal stress and exerts a neuroprotective role in TDP43 pathology.

Secondly, a molecular cascade was documented as correlate of motor neuron affection by RNA toxicity, in excellent overlap with the pathogenesis of ALS. The downregulation of *Eif5a2* may be a primary consequence of ATXN2 expansion, given that both factors colocalize in the ribosomal translation complex and that both act in the defense against viral RNAs. Also the accumulation of the toxic DNA/RNA sensor and stress granule assembly factor PQBP1 [91] may be a direct consequence of its sequestration by polyQ-expanded ATXN2. The downregulation of *Dcp2* as RNA degrading enzyme in the P-body may reflect the pathological retention of RNAs in stress granules affected by ATXN2 aggregation. In contrast, the upregulation of *Rnaset2* is probably a compensatory effort, since this enzyme has the ability to degrade inappropriately methylated RNAs, which are released from dysfunctional mitochondria in ever higher quantities during the ageing process. Altogether, the accumulation of toxic RNAs seems to be reflected by the transcriptional induction of sensors such as *Trl7*, of the signaling factor *Ripk1*, the particularly early elevation of lysosomal PGRN protein and the increase of cytosolic CASP3 protein levels, which promote the aggregation of TDP43 at stress granules. A known correlate of this cascade in SCA2 pathology is probably the accumulation of Staufen1 as a marker of neuronal RNA granules, which is also recruited into ATXN2 aggregates [144]. Given that KIF5 is crucial for anterograde transport of virus particles [42], the progressive expression downregulation of all three KIF5 subunits in the KIN spinal cord might constitute a protective antiviral response within neurons. The progressive downregulation of *Hecwl* expression is known to modulate the vulnerability of motor neurons by reduced degradation of misfolded SOD1, which was shown to affect stress granule dynamics via interaction with G3BP1 [54]. It is important to note that the permanent cytosolic sequestration of such nucleotide processing factors by ATXN2 aggregates would lead not only to impaired RNA quality control, but also to altered defenses of motor neurons e.g. against poliovirus RNA infections [40, 115, 202, 227]. Of course, the hierarchical sequence of events in both scenarios may be



more complex, but these dysregulations clearly stood out in the global transcriptome profiles of presymptomatic and preterminal KIN spinal cord.

The comparison of both stages identified 54 genes with progressively changed expression during the disease course, including conspicuously strong downregulations for several enzymes of cholesterol biogenesis. It is crucial to note that also in a mouse model of SCA3 (Machado-Joseph disease), recent global transcriptome profiling demonstrated a significant enrichment of cholesterol biogenesis dysregulations in brainstem, but increased levels of ceramides, di- and triglycerides in blood [204]. Furthermore, for SCA3 it was shown that restoration of brain cholesterol homeostasis has therapeutic potential [131]. Our observation of reduced cholesterol biogenesis in the *Atn2*-CAG100-KIN mouse is easily related with the documented depletion of peripheral fat tissues in SCA2 [121], and with findings of early demyelination in this CAG100-KIN mouse and in SCA2 patients [57, 140, 168]. The quantitative analysis of several intermediate steps of cholesterol metabolism in the KIN spinal cord confirmed a significant deficit of cholesterol and massive deficiencies for several precursors. Even stronger depletion of cholesterol and also of very-long-chain sphingomyelins (products of the ataxia disease gene *Elovl4*, also downregulated in the CAG100-KIN, see Suppl. Figure S7C) were recently documented in a SCA2 patient cerebellum [184]. Cholesterol is a requirement for the synthesis of sex hormones and of corticosteroid stress hormones, so this might explain also the gradually declining expression of androgen-dependent factor *Klk6* as the most dramatic downregulation effect. The progressive loss of *Cdr1* expression might be explained in a similar context, since it is known to be regulated by the myelination factor *Prnp* (prion protein). Our study is not the first report of a connection between RNA-binding proteins such as ATXN2, TDP43 or TIA1 on the one hand and obesity or cholesterol on the other hand. Transgenic overexpression or KnockIn of TDP43 in mouse triggered weight loss and increased fat deposition with elevated HDL cholesterol in blood [195, 197]; *LXRbeta*<sup>-/-</sup> mice showed TDP43 aggregation together with higher brain cholesterol [87]; conversely, the KnockOut of TDP43 results in dramatic loss of body fat [33]; similarly, the KnockOut of TIA1 triggers upregulation of fat storage factors [72] and the KnockOut of ATXN2 triggers hypercholesterolemia [95]. In ALS, the spinal cord ventral horn of patients showed a significant decrease of cholesterol [66], whereas in blood an increase of cholesterol was documented [60]. Controversial reports exist whether the use of cholesterol-lowering medication such as statins enhances or reduces ALS risk [49, 59]. In SCA2, the lipid metabolism seems to be dysregulated at a more basic level than cholesterol generation, given that expression of *Nat8l* as the enzyme responsible for N-acetylaspartate (NAA) synthesis was gradually declining in *Atn2*-CAG100-KIN spinal cord. Indeed, spinal NAA decreases during the disease course of ALS patients [27, 80, 171].

Overall, the gradual expression reduction of several cholesterol enzymes is prominent and strong, so it may become useful for the future validation of progression biomarkers in SCA2 patient samples. However, cholesterol depletion is hardly a SCA2-specific feature. It is therefore important to state that the progressive expression reduction of *Unc80* and *Eif5a2* concerns factors within the ATXN2 interactome and might thus represent primary and specific effects of SCA2 pathology. At present, clinical trials in SCA2 depend on the quantification of clinical, neurophysiological and imaging features with documented progression, such as the clinical SARA score [39, 83], quantification of sensory neuropathy [213], saccade slowing [162, 217, 218], periodic leg movements during sleep [161, 221] and brain volumetry [1, 159]. Since any improvement in these disease features occurs over extended periods of time, there is an unmet need to characterize molecular biomarkers that mirror therapeutic benefits very rapidly.

In conclusion, the spinal cord of our new *Atxn2*-CAG100-KIN mouse mutant revealed first insights into the molecular pathogenesis of SCA2. Sensory and motor affection involves prominently a loss of axonal and presynaptic factors, in parallel to depletion of cholesterol and phospholipid enzymes. Various molecular pathways are irritated by the sequestration of ATXN2 interactor molecules into aggregates, principally the role of stress granules in the defense against toxic RNAs. Several other altered pathways such as ribosomal translation, calcium homeostasis and cholesterol biogenesis occur at the endoplasmic reticulum, where ATXN2 was shown to play a crucial role for structure and dynamics according to studies in *C. elegans* and *D. melanogaster* [36]. SCA2 pathogenesis has considerable overlap with the mechanisms documented in other ataxias, dystonias, and with ALS-associated features such as RNA toxicity and endoplasmic reticulum dysfunction [200].

## References:

- 1 Adanyeguh IM, Perlberg V, Henry PG, Rinaldi D, Petit E, Valabregue R, Brice A, Durr A, Mochel F (2018) Autosomal dominant cerebellar ataxias: Imaging biomarkers with high effect sizes. *Neuroimage Clin* 19: 858-867 Doi 10.1016/j.nicl.2018.06.011
- 2 Al-Ramahi I, Perez AM, Lim J, Zhang M, Sorensen R, de Haro M, Branco J, Pulst SM, Zoghbi HY, Botas J (2007) dAtaxin-2 mediates expanded Ataxin-1-induced neurodegeneration in a *Drosophila* model of SCA1. *PLoS Genet* 3: e234 Doi 10.1371/journal.pgen.0030234
- 3 Almaguer-Mederos LE, Falcon NS, Almira YR, Zaldivar YG, Almarales DC, Gongora EM, Herrera MP, Batallan KE, Arminan RR, Manresa MV et al (2010) Estimation of the age at onset in spinocerebellar ataxia type 2 Cuban patients by survival analysis. *Clin Genet* 78: 169-174 Doi 10.1111/j.1399-0004.2009.01358.x
- 4 Ariumi Y, Kuroki M, Kushima Y, Osugi K, Hijikata M, Maki M, Ikeda M, Kato N (2011) Hepatitis C virus hijacks P-body and stress granule components around lipid droplets. *J Virol* 85: 6882-6892 Doi 10.1128/JVI.02418-10
- 5 Auburger G, Diaz GO, Capote RF, Sanchez SG, Perez MP, del Cueto ME, Meneses MG, Farrall M, Williamson R, Chamberlain S et al (1990) Autosomal dominant ataxia: genetic evidence for locus heterogeneity from a Cuban founder-effect population. *Am J Hum Genet* 46: 1163-1177
- 6 Auburger G, Gispert S, Lahut S, Omur O, Damrath E, Heck M, Basak N (2014) 12q24 locus association with type 1 diabetes: SH2B3 or ATXN2? *World J Diabetes* 5: 316-327 Doi 10.4239/wjd.v5.i3.316
- 7 Auburger G, Sen NE, Meierhofer D, Basak AN, Gitler AD (2017) Efficient Prevention of Neurodegenerative Diseases by Depletion of Starvation Response Factor Ataxin-2. *Trends Neurosci* 40: 507-516 Doi 10.1016/j.tins.2017.06.004
- 8 Auburger GW (2012) Spinocerebellar ataxia type 2. *Handb Clin Neurol* 103: 423-436 Doi 10.1016/B978-0-444-51892-7.00026-7
- 9 Augustin I, Korte S, Rickmann M, Kretzschmar HA, Sudhof TC, Herms JW, Brose N (2001) The cerebellum-specific Munc13 isoform Munc13-3 regulates cerebellar synaptic transmission and motor learning in mice. *J Neurosci* 21: 10-17
- 10 Bar DZ, Charar C, Dorfman J, Yadid T, Tafforeau L, Lafontaine DL, Gruenbaum Y (2016) Cell size and fat content of dietary-restricted *Caenorhabditis elegans* are regulated by ATX-2, an mTOR repressor. *Proc Natl Acad Sci U S A* 113: E4620-4629 Doi 10.1073/pnas.1512156113
- 11 Baumer D, East SZ, Tseu B, Zeman A, Hilton D, Talbot K, Ansorge O (2014) FTLN-ALS of TDP-43 type and SCA2 in a family with a full ataxin-2 polyglutamine expansion. *Acta Neuropathol* 128: 597-604 Doi 10.1007/s00401-014-1277-z
- 12 Becker LA, Huang B, Bieri G, Ma R, Knowles DA, Jafar-Nejad P, Messing J, Kim HJ, Soriano A, Auburger G et al (2017) Therapeutic reduction of ataxin-2 extends lifespan and reduces pathology in TDP-43 mice. *Nature* 544: 367-371 Doi 10.1038/nature22038
- 13 Beel S, Moisse M, Damme M, De Muyneck L, Robberecht W, Van Den Bosch L, Saftig P, Van Damme P (2017) Progranulin functions as a cathepsin D chaperone to stimulate axonal outgrowth in vivo. *Hum Mol Genet* 26: 2850-2863 Doi 10.1093/hmg/ddx162
- 14 Belal S, Cancel G, Stevanin G, Hentati F, Khati C, Ben Hamida C, Auburger G, Agid Y, Ben Hamida M, Brice A (1994) Clinical and genetic analysis of a Tunisian family with autosomal dominant cerebellar ataxia type 1 linked to the SCA2 locus. *Neurology* 44: 1423-1426 Doi 10.1212/wnl.44.8.1423
- 15 Bernard-Marissal N, Chrast R, Schneider BL (2018) Endoplasmic reticulum and mitochondria in diseases of motor and sensory neurons: a broken relationship? *Cell Death Dis* 9: 333 Doi 10.1038/s41419-017-0125-1
- 16 Bezerra ML, Pedroso JL, Braga-Neto P, Abrahao A, de Albuquerque MV, Borges FR, Jr., Saraiva-Pereira ML, Jardim LB, de Oliveira Braga NI, Manzano GM et al (2016) Pattern of

- Peripheral Nerve Involvement in Spinocerebellar Ataxia Type 2: a Neurophysiological Assessment. *Cerebellum* 15: 767-773 Doi 10.1007/s12311-015-0753-x
- 17 Blasi E, Barluzzi R, Bocchini V, Mazzolla R, Bistoni F (1990) Immortalization of murine microglial cells by a v-raf/v-myc carrying retrovirus. *J Neuroimmunol* 27: 229-237 Doi 10.1016/0165-5728(90)90073-v
- 18 Bolla L, Palmer RM (1997) Paraneoplastic cerebellar degeneration. Case report and literature review. *Arch Intern Med* 157: 1258-1262 Doi 10.1001/archinte.157.11.1258
- 19 Book A, Guella I, Candido T, Brice A, Hattori N, Jeon B, Farrer MJ (2018) A Meta-Analysis of alpha-Synuclein Multiplication in Familial Parkinsonism. *Front Neurol* 9: 1021 Doi 10.3389/fneur.2018.01021
- 20 Brenner D, Yilmaz R, Muller K, Grehl T, Petri S, Meyer T, Grosskreutz J, Weydt P, Ruf W, Neuwirth C et al (2018) Hot-spot KIF5A mutations cause familial ALS. *Brain* 141: 688-697 Doi 10.1093/brain/awx370
- 21 Businaro R, Nori SL, Toesca A, Evangelisti E, De Renzis G, Fumagalli L (2001) Altered balance of proteinase inhibitors in atrophic muscle after denervation. *Ital J Anat Embryol* 106: 159-165
- 22 Caceres CJ, Angulo J, Contreras N, Pino K, Vera-Otarola J, Lopez-Lastra M (2016) Targeting deoxyhypusine hydroxylase activity impairs cap-independent translation initiation driven by the 5'untranslated region of the HIV-1, HTLV-1, and MMTV mRNAs. *Antiviral Res* 134: 192-206 Doi 10.1016/j.antiviral.2016.09.006
- 23 Caioli S, Curcio L, Pieri M, Antonini A, Marolda R, Severini C, Zona C (2011) Substance P receptor activation induces downregulation of the AMPA receptor functionality in cortical neurons from a genetic model of Amyotrophic Lateral Sclerosis. *Neurobiol Dis* 44: 92-101 Doi 10.1016/j.nbd.2011.06.008
- 24 Cambray S, Pedraza N, Rafel M, Gari E, Aldea M, Gallego C (2009) Protein kinase KIS localizes to RNA granules and enhances local translation. *Mol Cell Biol* 29: 726-735 Doi 10.1128/MCB.01180-08
- 25 Cameron B, Tse W, Lamb R, Li X, Lamb BT, Landreth GE (2012) Loss of interleukin receptor-associated kinase 4 signaling suppresses amyloid pathology and alters microglial phenotype in a mouse model of Alzheimer's disease. *J Neurosci* 32: 15112-15123 Doi 10.1523/JNEUROSCI.1729-12.2012
- 26 Canet-Pons J, Schubert R, Duecker RP, Schrewe R, Wolke S, Kieslich M, Schnolzer M, Chiochetti A, Auburger G, Zielen S et al (2018) Ataxia telangiectasia alters the ApoB and reelin pathway. *Neurogenetics* 19: 237-255 Doi 10.1007/s10048-018-0557-5
- 27 Carew JD, Nair G, Andersen PM, Wu J, Gronka S, Hu X, Benatar M (2011) Presymptomatic spinal cord neurometabolic findings in SOD1-positive people at risk for familial ALS. *Neurology* 77: 1370-1375 Doi 10.1212/WNL.0b013e318231526a
- 28 Carniglia L, Ramirez D, Durand D, Saba J, Turati J, Caruso C, Scimonelli TN, Lasaga M (2017) Neuropeptides and Microglial Activation in Inflammation, Pain, and Neurodegenerative Diseases. *Mediators Inflamm* 2017: 5048616 Doi 10.1155/2017/5048616
- 29 Casula M, Iyer AM, Spliet WG, Anink JJ, Steentjes K, Sta M, Troost D, Aronica E (2011) Toll-like receptor signaling in amyotrophic lateral sclerosis spinal cord tissue. *Neuroscience* 179: 233-243 Doi 10.1016/j.neuroscience.2011.02.001
- 30 Charlesworth G, Plagnol V, Holmstrom KM, Bras J, Sheerin UM, Preza E, Rubio-Agusti I, Ryten M, Schneider SA, Stamelou M et al (2012) Mutations in ANO3 cause dominant craniocervical dystonia: ion channel implicated in pathogenesis. *Am J Hum Genet* 91: 1041-1050 Doi 10.1016/j.ajhg.2012.10.024
- 31 Chen-Plotkin AS, Lee VM, Trojanowski JQ (2010) TAR DNA-binding protein 43 in neurodegenerative disease. *Nat Rev Neurol* 6: 211-220 Doi 10.1038/nrneurol.2010.18
- 32 Cheng N, Wied HM, Gaul JJ, Doyle LE, Reich SG (2018) SCA2 presenting as a focal dystonia. *J Clin Mov Disord* 5: 6 Doi 10.1186/s40734-018-0073-7

- 33 Chiang PM, Ling J, Jeong YH, Price DL, Aja SM, Wong PC (2010) Deletion of TDP-43 down-regulates Tbc1d1, a gene linked to obesity, and alters body fat metabolism. *Proc Natl Acad Sci U S A* 107: 16320-16324 Doi 10.1073/pnas.1002176107
- 34 Chiba-Falek O, Nussbaum RL (2001) Effect of allelic variation at the NACP-Rep1 repeat upstream of the alpha-synuclein gene (SNCA) on transcription in a cell culture luciferase reporter system. *Hum Mol Genet* 10: 3101-3109 Doi 10.1093/hmg/10.26.3101
- 35 Damrath E, Heck MV, Gispert S, Azizov M, Nowock J, Seifried C, Rub U, Walter M, Auburger G (2012) ATXN2-CAG42 sequesters PABPC1 into insolubility and induces FBXW8 in cerebellum of old ataxic knock-in mice. *PLoS Genet* 8: e1002920 Doi 10.1371/journal.pgen.1002920
- 36 Del Castillo U, Gnazzo MM, Sorensen Turpin CG, Nguyen KCQ, Semaya E, Lam Y, de Cruz MA, Bembenek JN, Hall DH, Riggs B et al (2019) Conserved role for Ataxin-2 in mediating endoplasmic reticulum dynamics. *Traffic* 20: 436-447 Doi 10.1111/tra.12647
- 37 DeMille D, Badal BD, Evans JB, Mathis AD, Anderson JF, Grose JH (2015) PAS kinase is activated by direct SNF1-dependent phosphorylation and mediates inhibition of TORC1 through the phosphorylation and activation of Pbp1. *Mol Biol Cell* 26: 569-582 Doi 10.1091/mbc.E14-06-1088
- 38 Dhir A, Dhir S, Borowski LS, Jimenez L, Teitell M, Rotig A, Crow YJ, Rice GI, Duffy D, Tamby C et al (2018) Mitochondrial double-stranded RNA triggers antiviral signalling in humans. *Nature* 560: 238-242 Doi 10.1038/s41586-018-0363-0
- 39 Diallo A, Jacobi H, Cook A, Labrum R, Durr A, Brice A, Charles P, Marelli C, Mariotti C, Nanetti L et al (2018) Survival in patients with spinocerebellar ataxia types 1, 2, 3, and 6 (EUROSCA): a longitudinal cohort study. *Lancet Neurol* 17: 327-334 Doi 10.1016/S1474-4422(18)30042-5
- 40 Dougherty JD, Tsai WC, Lloyd RE (2015) Multiple Poliovirus Proteins Repress Cytoplasmic RNA Granules. *Viruses* 7: 6127-6140 Doi 10.3390/v7122922
- 41 Drost J, Nonis D, Eich F, Leske O, Damrath E, Brunt ER, Lastres-Becker I, Heumann R, Nowock J, Auburger G (2013) Ataxin-2 modulates the levels of Grb2 and SRC but not ras signaling. *J Mol Neurosci* 51: 68-81 Doi 10.1007/s12031-012-9949-4
- 42 DuRaine G, Wisner TW, Howard P, Johnson DC (2018) Kinesin-1 Proteins KIF5A, -5B, and -5C Promote Anterograde Transport of Herpes Simplex Virus Enveloped Virions in Axons. *J Virol* 92: Doi 10.1128/JVI.01269-18
- 43 Egorova PA, Zakharova OA, Vlasova OL, Bezprozvanny IB (2016) In vivo analysis of cerebellar Purkinje cell activity in SCA2 transgenic mouse model. *J Neurophysiol* 115: 2840-2851 Doi 10.1152/jn.00913.2015
- 44 Elden AC, Kim HJ, Hart MP, Chen-Plotkin AS, Johnson BS, Fang X, Armakola M, Geser F, Greene R, Lu MM et al (2010) Ataxin-2 intermediate-length polyglutamine expansions are associated with increased risk for ALS. *Nature* 466: 1069-1075 Doi 10.1038/nature09320
- 45 Estrada R, Galarraga J, Orozco G, Nodarse A, Auburger G (1999) Spinocerebellar ataxia 2 (SCA2): morphometric analyses in 11 autopsies. *Acta Neuropathol* 97: 306-310 Doi 10.1007/s004010050989
- 46 Fittschen M, Lastres-Becker I, Halbach MV, Damrath E, Gispert S, Azizov M, Walter M, Muller S, Auburger G (2015) Genetic ablation of ataxin-2 increases several global translation factors in their transcript abundance but decreases translation rate. *Neurogenetics* 16: 181-192 Doi 10.1007/s10048-015-0441-5
- 47 Fitzgerald KD, Semler BL (2013) Poliovirus infection induces the co-localization of cellular protein SRp20 with TIA-1, a cytoplasmic stress granule protein. *Virus Res* 176: 223-231 Doi 10.1016/j.virusres.2013.06.012
- 48 Fleshood HL, Pitot HC (1970) The metabolism of O-phosphorylethanolamine in animal tissues. II. Metabolic regulation of O-phosphorylethanolamine phospho-lyase in vivo. *Arch Biochem Biophys* 141: 423-429 Doi 10.1016/0003-9861(70)90158-x
- 49 Freedman DM, Kuncl RW, Cahoon EK, Rivera DR, Pfeiffer RM (2018) Relationship of statins and other cholesterol-lowering medications and risk of amyotrophic lateral sclerosis in the

- US elderly. *Amyotroph Lateral Scler Frontotemporal Degener* 19: 538-546 Doi 10.1080/21678421.2018.1511731
- 50 Freund HJ, Barnikol UB, Nolte D, Treuer H, Auburger G, Tass PA, Samii M, Sturm V (2007) Subthalamic-thalamic DBS in a case with spinocerebellar ataxia type 2 and severe tremor-A unusual clinical benefit. *Mov Disord* 22: 732-735 Doi 10.1002/mds.21338
- 51 Fuchs T, Saunders-Pullman R, Masuho I, Luciano MS, Raymond D, Factor S, Lang AE, Liang TW, Trosch RM, White S et al (2013) Mutations in GNAL cause primary torsion dystonia. *Nat Genet* 45: 88-92 Doi 10.1038/ng.2496
- 52 Furukawa MT, Sakamoto H, Inoue K (2015) Interaction and colocalization of HERMES/RBPMS with NonO, PSF, and G3BP1 in neuronal cytoplasmic RNP granules in mouse retinal line cells. *Genes Cells* 20: 257-266 Doi 10.1111/gtc.12224
- 53 Gabriel TL, Tol MJ, Ottenhof R, van Roomen C, Aten J, Claessen N, Hooibrink B, de Weijer B, Serlie MJ, Argmann C et al (2014) Lysosomal stress in obese adipose tissue macrophages contributes to MITF-dependent Gpnmb induction. *Diabetes* 63: 3310-3323 Doi 10.2337/db13-1720
- 54 Gal J, Kuang L, Barnett KR, Zhu BZ, Shissler SC, Korotkov KV, Hayward LJ, Kasarskis EJ, Zhu H (2016) ALS mutant SOD1 interacts with G3BP1 and affects stress granule dynamics. *Acta Neuropathol* 132: 563-576 Doi 10.1007/s00401-016-1601-x
- 55 Ganapathi M, Padgett LR, Yamada K, Devinsky O, Willaert R, Person R, Au PB, Tagoe J, McDonald M, Karłowicz D et al (2019) Recessive Rare Variants in Deoxyhypusine Synthase, an Enzyme Involved in the Synthesis of Hypusine, Are Associated with a Neurodevelopmental Disorder. *Am J Hum Genet* 104: 287-298 Doi 10.1016/j.ajhg.2018.12.017
- 56 Geloso MC, Corvino V, Marchese E, Serrano A, Michetti F, D'Ambrosi N (2017) The Dual Role of Microglia in ALS: Mechanisms and Therapeutic Approaches. *Front Aging Neurosci* 9: 242 Doi 10.3389/fnagi.2017.00242
- 57 Gierga K, Burk K, Bauer M, Orozco Diaz G, Auburger G, Schultz C, Vuksic M, Schols L, de Vos RA, Braak H et al (2005) Involvement of the cranial nerves and their nuclei in spinocerebellar ataxia type 2 (SCA2). *Acta Neuropathol* 109: 617-631 Doi 10.1007/s00401-005-1014-8
- 58 Gispert S, Kurz A, Waibel S, Bauer P, Liepelt I, Geisen C, Gitler AD, Becker T, Weber M, Berg D et al (2012) The modulation of Amyotrophic Lateral Sclerosis risk by ataxin-2 intermediate polyglutamine expansions is a specific effect. *Neurobiol Dis* 45: 356-361 Doi 10.1016/j.nbd.2011.08.021
- 59 Golomb BA, Kwon EK, Koperski S, Evans MA (2009) Amyotrophic lateral sclerosis-like conditions in possible association with cholesterol-lowering drugs: an analysis of patient reports to the University of California, San Diego (UCSD) Statin Effects Study. *Drug Saf* 32: 649-661 Doi 10.2165/00002018-200932080-00004
- 60 Gonzalez De Aguilar JL (2019) Lipid Biomarkers for Amyotrophic Lateral Sclerosis. *Front Neurol* 10: 284 Doi 10.3389/fneur.2019.00284
- 61 Goulding DR, Nikolova VD, Mishra L, Zhuo L, Kimata K, McBride SJ, Moy SS, Harry GJ, Garantziotis S (2019) Inter-alpha-inhibitor deficiency in the mouse is associated with alterations in anxiety-like behavior, exploration and social approach. *Genes Brain Behav* 18: e12505 Doi 10.1111/gbb.12505
- 62 Grosskreutz J, Van Den Bosch L, Keller BU (2010) Calcium dysregulation in amyotrophic lateral sclerosis. *Cell Calcium* 47: 165-174 Doi 10.1016/j.ceca.2009.12.002
- 63 Guo Z, Zhao C, Huang M, Huang T, Fan M, Xie Z, Chen Y, Zhao X, Xia G, Geng J et al (2012) Tlx1/3 and Ptf1a control the expression of distinct sets of transmitter and peptide receptor genes in the developing dorsal spinal cord. *J Neurosci* 32: 8509-8520 Doi 10.1523/JNEUROSCI.6301-11.2012
- 64 Gutierrez E, Shin BS, Woolstenhulme CJ, Kim JR, Saini P, Buskirk AR, Dever TE (2013) eIF5A promotes translation of polyproline motifs. *Mol Cell* 51: 35-45 Doi 10.1016/j.molcel.2013.04.021

- 65 Halbach MV, Gispert S, Stehning T, Damrath E, Walter M, Auburger G (2017) Atxn2 Knockout and CAG42-Knock-in Cerebellum Shows Similarly Dysregulated Expression in Calcium Homeostasis Pathway. *Cerebellum* 16: 68-81 Doi 10.1007/s12311-016-0762-4
- 66 Hanrieder J, Ewing AG (2014) Spatial elucidation of spinal cord lipid- and metabolite-regulations in amyotrophic lateral sclerosis. *Sci Rep* 4: 5266 Doi 10.1038/srep05266
- 67 Hart MP, Gitler AD (2012) ALS-associated ataxin 2 polyQ expansions enhance stress-induced caspase 3 activation and increase TDP-43 pathological modifications. *J Neurosci* 32: 9133-9142 Doi 10.1523/JNEUROSCI.0996-12.2012
- 68 Hartmann G (2017) Nucleic Acid Immunity. *Adv Immunol* 133: 121-169 Doi 10.1016/bs.ai.2016.11.001
- 69 Haud N, Kara F, Diekmann S, Henneke M, Willer JR, Hillwig MS, Gregg RG, Macintosh GC, Gartner J, Alia A et al (2011) rnas2 mutant zebrafish model familial cystic leukoencephalopathy and reveal a role for RNase T2 in degrading ribosomal RNA. *Proc Natl Acad Sci U S A* 108: 1099-1103 Doi 10.1073/pnas.1009811107
- 70 Hawley ZCE, Campos-Melo D, Strong MJ (2019) MiR-105 and miR-9 regulate the mRNA stability of neuronal intermediate filaments. Implications for the pathogenesis of amyotrophic lateral sclerosis (ALS). *Brain Res* 1706: 93-100 Doi 10.1016/j.brainres.2018.10.032
- 71 Hayashi S, Amari M, Okamoto K (2013) Loss of calretinin- and parvalbumin-immunoreactive axons in anterolateral columns beyond the corticospinal tracts of amyotrophic lateral sclerosis spinal cords. *J Neurol Sci* 331: 61-66 Doi 10.1016/j.jns.2013.05.008
- 72 Heck MV, Azizov M, Stehning T, Walter M, Kedersha N, Auburger G (2014) Dysregulated expression of lipid storage and membrane dynamics factors in Tia1 knockout mouse nervous tissue. *Neurogenetics* 15: 135-144 Doi 10.1007/s10048-014-0397-x
- 73 Helbig KL, Hedrich UB, Shinde DN, Krey I, Teichmann AC, Hentschel J, Schubert J, Chamberlin AC, Huether R, Lu HM et al (2016) A recurrent mutation in KCNA2 as a novel cause of hereditary spastic paraplegia and ataxia. *Ann Neurol* 80: Doi 10.1002/ana.24762
- 74 Heneka MT, Kummer MP, Latz E (2014) Innate immune activation in neurodegenerative disease. *Nat Rev Immunol* 14: 463-477 Doi 10.1038/nri3705
- 75 Henneke M, Diekmann S, Ohlenbusch A, Kaiser J, Engelbrecht V, Kohlschutter A, Kratzner R, Madruga-Garrido M, Mayer M, Opitz L et al (2009) RNASET2-deficient cystic leukoencephalopathy resembles congenital cytomegalovirus brain infection. *Nat Genet* 41: 773-775 Doi 10.1038/ng.398
- 76 Hou L, Zhang Y, Yang Y, Xiang K, Tan Q, Guo Q (2015) Intrathecal siRNA against GPNMB attenuates nociception in a rat model of neuropathic pain. *J Mol Neurosci* 55: 533-540 Doi 10.1007/s12031-014-0379-3
- 77 Huang J, Liu P, Wang G (2018) Regulation of mitochondrion-associated cytosolic ribosomes by mammalian mitochondrial ribonuclease T2 (RNASET2). *J Biol Chem* 293: 19633-19644 Doi 10.1074/jbc.RA118.005433
- 78 Huang Y, Higginson DS, Hester L, Park MH, Snyder SH (2007) Neuronal growth and survival mediated by eIF5A, a polyamine-modified translation initiation factor. *Proc Natl Acad Sci U S A* 104: 4194-4199 Doi 10.1073/pnas.0611609104
- 79 Huttenrauch M, Ogorek I, Klafki H, Otto M, Stadelmann C, Weggen S, Wiltfang J, Wirths O (2018) Glycoprotein NMB: a novel Alzheimer's disease associated marker expressed in a subset of activated microglia. *Acta Neuropathol Commun* 6: 108 Doi 10.1186/s40478-018-0612-3
- 80 Ikeda K, Murata K, Kawase Y, Kawabe K, Kano O, Yoshii Y, Takazawa T, Hirayama T, Iwasaki Y (2013) Relationship between cervical cord 1H-magnetic resonance spectroscopy and clinocoelectromyographic profile in amyotrophic lateral sclerosis. *Muscle Nerve* 47: 61-67 Doi 10.1002/mus.23467

- 81 Ito Y, Ofengeim D, Najafov A, Das S, Saberi S, Li Y, Hitomi J, Zhu H, Chen H, Mayo L et al (2016) RIPK1 mediates axonal degeneration by promoting inflammation and necroptosis in ALS. *Science* 353: 603-608 Doi 10.1126/science.aaf6803
- 82 Iwaki H, Blauwendraat C, Leonard HL, Liu G, Maple-Grodem J, Corvol JC, Pihlstrom L, van Nimwegen M, Hutten SJ, Nguyen KH et al (2019) Genetic risk of Parkinson disease and progression: An analysis of 13 longitudinal cohorts. *Neurol Genet* 5: e348 Doi 10.1212/NXG.0000000000000348
- 83 Jacobi H, du Montcel ST, Bauer P, Giunti P, Cook A, Labrum R, Parkinson MH, Durr A, Brice A, Charles P et al (2015) Long-term disease progression in spinocerebellar ataxia types 1, 2, 3, and 6: a longitudinal cohort study. *Lancet Neurol* 14: 1101-1108 Doi 10.1016/S1474-4422(15)00202-1
- 84 Jagdeo JM, Dufour A, Klein T, Solis N, Kleifeld O, Kizhakkedathu J, Luo H, Overall CM, Jan E (2018) N-Terminomics TAILS Identifies Host Cell Substrates of Poliovirus and Coxsackievirus B3 3C Proteinases That Modulate Virus Infection. *J Virol* 92: Doi 10.1128/JVI.02211-17
- 85 Jiang Y, Li Z, Ma H, Cao X, Liu F, Tian A, Sun X, Li X, Wang J (2018) Upregulation of TREM2 Ameliorates Neuroinflammatory Responses and Improves Cognitive Deficits Triggered by Surgical Trauma in Apswe/PS1dE9 Mice. *Cell Physiol Biochem* 46: 1398-1411 Doi 10.1159/000489155
- 86 Kataoka K, Hara K, Haranishi Y, Terada T, Sata T (2013) The antinociceptive effect of SNAP5114, a gamma-aminobutyric acid transporter-3 inhibitor, in rat experimental pain models. *Anesth Analg* 116: 1162-1169 Doi 10.1213/ANE.0b013e318282dda7
- 87 Kim HJ, Fan X, Gabbi C, Yakimchuk K, Parini P, Warner M, Gustafsson JA (2008) Liver X receptor beta (LXRbeta): a link between beta-sitosterol and amyotrophic lateral sclerosis-Parkinson's dementia. *Proc Natl Acad Sci U S A* 105: 2094-2099 Doi 10.1073/pnas.0711599105
- 88 Kim HJ, Taylor JP (2017) Lost in Transportation: Nucleocytoplasmic Transport Defects in ALS and Other Neurodegenerative Diseases. *Neuron* 96: 285-297 Doi 10.1016/j.neuron.2017.07.029
- 89 Koyano S, Yagishita S, Kuroiwa Y, Tanaka F, Uchihara T (2014) Neuropathological staging of spinocerebellar ataxia type 2 by semiquantitative 1C2-positive neuron typing. Nuclear translocation of cytoplasmic 1C2 underlies disease progression of spinocerebellar ataxia type 2. *Brain Pathol* 24: 599-606 Doi 10.1111/bpa.12146
- 90 Kozlov G, Safaee N, Rosenauer A, Gehring K (2010) Structural basis of binding of P-body-associated proteins GW182 and ataxin-2 by the Mlle domain of poly(A)-binding protein. *J Biol Chem* 285: 13599-13606 Doi 10.1074/jbc.M109.089540
- 91 Kunde SA, Musante L, Grimme A, Fischer U, Muller E, Wanker EE, Kalscheuer VM (2011) The X-chromosome-linked intellectual disability protein PQBP1 is a component of neuronal RNA granules and regulates the appearance of stress granules. *Hum Mol Genet* 20: 4916-4931 Doi 10.1093/hmg/ddr430
- 92 Kuo PH, Gan SR, Wang J, Lo RY, Figueroa KP, Tomishon D, Pulst SM, Perlman S, Wilmot G, Gomez CM et al (2017) Dystonia and ataxia progression in spinocerebellar ataxias. *Parkinsonism Relat Disord* 45: 75-80 Doi 10.1016/j.parkreldis.2017.10.007
- 93 Kuriakose T, Kanneganti TD (2018) ZBP1: Innate Sensor Regulating Cell Death and Inflammation. *Trends Immunol* 39: 123-134 Doi 10.1016/j.it.2017.11.002
- 94 Lahut S, Omur O, Uyan O, Agim ZS, Ozoguz A, Parman Y, Deymeer F, Oflazer P, Koc F, Ozcelik H et al (2012) ATXN2 and its neighbouring gene SH2B3 are associated with increased ALS risk in the Turkish population. *PLoS One* 7: e42956 Doi 10.1371/journal.pone.0042956
- 95 Lastres-Becker I, Brodesser S, Lutjohann D, Azizov M, Buchmann J, Hintermann E, Sandhoff K, Schurmann A, Nowock J, Auburger G (2008) Insulin receptor and lipid metabolism pathology in ataxin-2 knock-out mice. *Hum Mol Genet* 17: 1465-1481 Doi 10.1093/hmg/ddn035
- 96 Lastres-Becker I, Nonis D, Eich F, Klinkenberg M, Gorospe M, Kotter P, Klein FA, Kedersha N, Auburger G (2016) Mammalian ataxin-2 modulates translation control at the pre-initiation



- complex via PI3K/mTOR and is induced by starvation. *Biochim Biophys Acta* 1862: 1558-1569  
Doi 10.1016/j.bbadis.2016.05.017
- 97 Lastres-Becker I, Nonis D, Nowock J, Auburger G (2019) New alternative splicing variants of  
the ATXN2 transcript. *Neurological Research and Practice* 1: Doi 10.1186/s42466-019-0025-1
- 98 Lee RW, Conley SK, Gropman A, Porter FD, Baker EH (2013) Brain magnetic resonance  
imaging findings in Smith-Lemli-Opitz syndrome. *Am J Med Genet A* 161A: 2407-2419 Doi  
10.1002/ajmg.a.36096
- 99 Lee T, Li YR, Ingre C, Weber M, Grehl T, Gredal O, de Carvalho M, Meyer T, Tysnes OB,  
Auburger G et al (2011) Ataxin-2 intermediate-length polyglutamine expansions in European  
ALS patients. *Hum Mol Genet* 20: 1697-1700 Doi 10.1093/hmg/ddr045
- 100 Lehmann SM, Kruger C, Park B, Derkow K, Rosenberger K, Baumgart J, Trimbuch T, Eom G,  
Hinze M, Kaul D et al (2012) An unconventional role for miRNA: let-7 activates Toll-like  
receptor 7 and causes neurodegeneration. *Nat Neurosci* 15: 827-835 Doi 10.1038/nn.3113
- 101 Li CH, Ohn T, Ivanov P, Tisdale S, Anderson P (2010) eIF5A promotes translation elongation,  
polysome disassembly and stress granule assembly. *PLoS One* 5: e9942 Doi  
10.1371/journal.pone.0009942
- 102 Li W, Fotinos A, Wu Q, Chen Y, Zhu Y, Baranov S, Tu Y, Zhou EW, Sinha B, Kristal BS et al  
(2015) N-acetyl-L-tryptophan delays disease onset and extends survival in an amyotrophic  
lateral sclerosis transgenic mouse model. *Neurobiol Dis* 80: 93-103 Doi  
10.1016/j.nbd.2015.05.002
- 103 Li YR, King OD, Shorter J, Gitler AD (2013) Stress granules as crucibles of ALS pathogenesis. *J  
Cell Biol* 201: 361-372 Doi 10.1083/jcb.201302044
- 104 Liapis E, Sandiford S, Wang Q, Gaidosh G, Motti D, Levay K, Slepak VZ (2012) Subcellular  
localization of regulator of G protein signaling RGS7 complex in neurons and transfected  
cells. *J Neurochem* 122: 568-581 Doi 10.1111/j.1471-4159.2012.07811.x
- 105 Lim J, Hao T, Shaw C, Patel AJ, Szabo G, Rual JF, Fisk CJ, Li N, Smolyar A, Hill DE et al (2006) A  
protein-protein interaction network for human inherited ataxias and disorders of Purkinje  
cell degeneration. *Cell* 125: 801-814 Doi 10.1016/j.cell.2006.03.032
- 106 Lin CY, Pfluger CM, Henderson RD, McCombe PA (2012) Reduced levels of interleukin 33 and  
increased levels of soluble ST2 in subjects with amyotrophic lateral sclerosis. *J  
Neuroimmunol* 249: 93-95 Doi 10.1016/j.jneuroim.2012.05.001
- 107 Liu J, Tang TS, Tu H, Nelson O, Herndon E, Huynh DP, Pulst SM, Bezprozvanny I (2009)  
Deranged calcium signaling and neurodegeneration in spinocerebellar ataxia type 2. *J  
Neurosci* 29: 9148-9162 Doi 10.1523/JNEUROSCI.0660-09.2009
- 108 Liu Y, Szaro BG (2011) hnRNP K post-transcriptionally co-regulates multiple cytoskeletal  
genes needed for axonogenesis. *Development* 138: 3079-3090 Doi 10.1242/dev.066993
- 109 Lu B, Su Y, Das S, Wang H, Wang Y, Liu J, Ren D (2009) Peptide neurotransmitters activate a  
cation channel complex of NALCN and UNC-80. *Nature* 457: 741-744 Doi  
10.1038/nature07579
- 110 Lubas M, Harder LM, Kumsta C, Tiessen I, Hansen M, Andersen JS, Lund AH, Frankel LB (2018)  
eIF5A is required for autophagy by mediating ATG3 translation. *EMBO Rep* 19: Doi  
10.15252/embr.201846072
- 111 Lui H, Zhang J, Makinson SR, Cahill MK, Kelley KW, Huang HY, Shang Y, Oldham MC, Martens  
LH, Gao F et al (2016) Progranulin Deficiency Promotes Circuit-Specific Synaptic Pruning by  
Microglia via Complement Activation. *Cell* 165: 921-935 Doi 10.1016/j.cell.2016.04.001
- 112 Maier B, Ogiwara T, Trace AP, Tersey SA, Robbins RD, Chakrabarti SK, Nunemaker CS, Stull  
ND, Taylor CA, Thompson JE et al (2010) The unique hypusine modification of eIF5A  
promotes islet beta cell inflammation and dysfunction in mice. *J Clin Invest* 120: 2156-2170  
Doi 10.1172/JCI38924
- 113 Mandal A, Mandal S, Park MH (2016) Global quantitative proteomics reveal up-regulation of  
endoplasmic reticulum stress response proteins upon depletion of eIF5A in HeLa cells. *Sci  
Rep* 6: 25795 Doi 10.1038/srep25795

- 114 Maric G, Annis MG, Dong Z, Rose AA, Ng S, Perkins D, MacDonald PA, Ouellet V, Russo C, Siegel PM (2015) GPNMB cooperates with neuropilin-1 to promote mammary tumor growth and engages integrin alpha5beta1 for efficient breast cancer metastasis. *Oncogene* 34: 5494-5504 Doi 10.1038/onc.2015.8
- 115 Marin M, Golem S, Rose KM, Kozak SL, Kabat D (2008) Human immunodeficiency virus type 1 Vif functionally interacts with diverse APOBEC3 cytidine deaminases and moves with them between cytoplasmic sites of mRNA metabolism. *J Virol* 82: 987-998 Doi 10.1128/JVI.01078-07
- 116 Markovic V, Dragasevic-Miskovic NT, Stankovic I, Petrovic I, Svetel M, Kostic VS (2016) Dystonia in Patients With Spinocerebellar Ataxia Type 2. *Mov Disord Clin Pract* 3: 292-295 Doi 10.1002/mdc3.12274
- 117 Maskey D, Pradhan J, Kim HJ, Park KS, Ahn SC, Kim MJ (2010) Immunohistochemical localization of calbindin D28-k, parvalbumin, and calretinin in the cerebellar cortex of the circling mouse. *Neurosci Lett* 483: 132-136 Doi 10.1016/j.neulet.2010.07.077
- 118 Mason AR, Elia LP, Finkbeiner S (2017) The Receptor-interacting Serine/Threonine Protein Kinase 1 (RIPK1) Regulates Progranulin Levels. *J Biol Chem* 292: 3262-3272 Doi 10.1074/jbc.M116.752006
- 119 Matsuishi T, Nagamitsu S, Shoji H, Itoh M, Takashima S, Iwaki T, Shida N, Yamashita Y, Sakai T, Kato H (1999) Increased cerebrospinal fluid levels of substance P in patients with amyotrophic lateral sclerosis. Short communication. *J Neural Transm (Vienna)* 106: 943-948 Doi 10.1007/s007020050214
- 120 McCann C, Holohan EE, Das S, Dervan A, Larkin A, Lee JA, Rodrigues V, Parker R, Ramaswami M (2011) The Ataxin-2 protein is required for microRNA function and synapse-specific long-term olfactory habituation. *Proc Natl Acad Sci U S A* 108: E655-662 Doi 10.1073/pnas.1107198108
- 121 Medrano-Montero J, Velázquez-Pérez L, Rodríguez-Labrada R, Canales-Ochoa N, Pena-Acosta A, Almaguer-Mederos LE, Estupinan-Rodríguez A, Auburger G (2018) Early cranial nerve dysfunction is correlated to altered facial morphology in spinocerebellar ataxia type 2. *Investigación en Discapacidad* 7: 53-66
- 122 Meierhofer D, Halbach M, Sen NE, Gispert S, Auburger G (2016) Ataxin-2 (Atxn2)-Knock-Out Mice Show Branched Chain Amino Acids and Fatty Acids Pathway Alterations. *Mol Cell Proteomics* 15: 1728-1739 Doi 10.1074/mcp.M115.056770
- 123 Miyazaki K, Fujita T, Ozaki T, Kato C, Kurose Y, Sakamoto M, Kato S, Goto T, Itoyama Y, Aoki M et al (2004) NEDL1, a novel ubiquitin-protein isopeptide ligase for dishevelled-1, targets mutant superoxide dismutase-1. *J Biol Chem* 279: 11327-11335 Doi 10.1074/jbc.M312389200
- 124 Moloney EB, Moskites A, Ferrari EJ, Isacson O, Hallett PJ (2018) The glycoprotein GPNMB is selectively elevated in the substantia nigra of Parkinson's disease patients and increases after lysosomal stress. *Neurobiol Dis* 120: 1-11 Doi 10.1016/j.nbd.2018.08.013
- 125 Mounce BC, Olsen ME, Vignuzzi M, Connor JH (2017) Polyamines and Their Role in Virus Infection. *Microbiol Mol Biol Rev* 81: Doi 10.1128/MMBR.00029-17
- 126 Murugesan V, Liu J, Yang R, Lin H, Lischuk A, Pastores G, Zhang X, Chuang WL, Mistry PK (2018) Validating glycoprotein non-metastatic melanoma B (gpNMB, osteoactivin), a new biomarker of Gaucher disease. *Blood Cells Mol Dis* 68: 47-53 Doi 10.1016/j.bcmd.2016.12.002
- 127 Nagahara Y, Shimazawa M, Ohuchi K, Ito J, Takahashi H, Tsuruma K, Kakita A, Hara H (2017) GPNMB ameliorates mutant TDP-43-induced motor neuron cell death. *J Neurosci Res* 95: 1647-1665 Doi 10.1002/jnr.23999
- 128 Netrakanti PR, Cooper BH, Dere E, Poggi G, Winkler D, Brose N, Ehrenreich H (2015) Fast cerebellar reflex circuitry requires synaptic vesicle priming by munc13-3. *Cerebellum* 14: 264-283 Doi 10.1007/s12311-015-0645-0

- 129 Newton K (2019) Multitasking Kinase RIPK1 Regulates Cell Death and Inflammation. *Cold Spring Harb Perspect Biol*: Doi 10.1101/cshperspect.a036368
- 130 Nicolas A, Kenna KP, Renton AE, Ticozzi N, Faghri F, Chia R, Dominov JA, Kenna BJ, Nalls MA, Keagle P et al (2018) Genome-wide Analyses Identify KIF5A as a Novel ALS Gene. *Neuron* 97: 1268-1283 e1266 Doi 10.1016/j.neuron.2018.02.027
- 131 Nobrega C, Mendonca L, Marcelo A, Lamaziere A, Tome S, Despres G, Matos CA, Mechet F, Langui D, den Dunnen W et al (2019) Restoring brain cholesterol turnover improves autophagy and has therapeutic potential in mouse models of spinocerebellar ataxia. *Acta Neuropathol* 138: 837-858 Doi 10.1007/s00401-019-02019-7
- 132 Nonhoff U, Ralser M, Welzel F, Piccini I, Balzereit D, Yaspo ML, Lehrach H, Krobatsch S (2007) Ataxin-2 interacts with the DEAD/H-box RNA helicase DDX6 and interferes with P-bodies and stress granules. *Mol Biol Cell* 18: 1385-1396 Doi 10.1091/mbc.e06-12-1120
- 133 Nonis D, Schmidt MHH, van de Loo S, Eich F, Dikic I, Nowock J, Auburger G (2008) Ataxin-2 associates with the endocytosis complex and affects EGF receptor trafficking. *Cell Signal* 20: 1725-1739 Doi 10.1016/j.cellsig.2008.05.018
- 134 Okroj M, Holmquist E, Sjolander J, Corrales L, Saxne T, Wisniewski HG, Blom AM (2012) Heavy chains of inter alpha inhibitor (I $\alpha$ PI) inhibit the human complement system at early stages of the cascade. *J Biol Chem* 287: 20100-20110 Doi 10.1074/jbc.M111.324913
- 135 Okuda T, Hattori H, Takeuchi S, Shimizu J, Ueda H, Palvimo JJ, Kanazawa I, Kawano H, Nakagawa M, Okazawa H (2003) PQBP-1 transgenic mice show a late-onset motor neuron disease-like phenotype. *Hum Mol Genet* 12: 711-725 Doi 10.1093/hmg/ddg084
- 136 Oosthuysen B, Moons L, Storkebaum E, Beck H, Nuyens D, Brusselmans K, Van Dorpe J, Hellings P, Gorselink M, Heymans S et al (2001) Deletion of the hypoxia-response element in the vascular endothelial growth factor promoter causes motor neuron degeneration. *Nat Genet* 28: 131-138 Doi 10.1038/88842
- 137 Orozco Diaz G, Nodarse Fleites A, Cordoves Sagaz R, Auburger G (1990) Autosomal dominant cerebellar ataxia: clinical analysis of 263 patients from a homogeneous population in Holguin, Cuba. *Neurology* 40: 1369-1375 Doi 10.1212/wnl.40.9.1369
- 138 Ostrowski LA, Hall AC, Szafranski KJ, Oshidari R, Abraham KJ, Chan JNY, Krustev C, Zhang K, Wang A, Liu Y et al (2018) Conserved Pbp1/Ataxin-2 regulates retrotransposon activity and connects polyglutamine expansion-driven protein aggregation to lifespan-controlling rDNA repeats. *Commun Biol* 1: 187 Doi 10.1038/s42003-018-0187-3
- 139 Oyama F, Miyazaki H, Sakamoto N, Becquet C, Machida Y, Kaneko K, Uchikawa C, Suzuki T, Kurosawa M, Ikeda T et al (2006) Sodium channel beta4 subunit: down-regulation and possible involvement in neuritic degeneration in Huntington's disease transgenic mice. *J Neurochem* 98: 518-529 Doi 10.1111/j.1471-4159.2006.03893.x
- 140 Paciorkowski AR, Shafrir Y, Hrivnak J, Patterson MC, Tennison MB, Clark HB, Gomez CM (2011) Massive expansion of SCA2 with autonomic dysfunction, retinitis pigmentosa, and infantile spasms. *Neurology* 77: 1055-1060 Doi 10.1212/WNL.0b013e31822e5627
- 141 Pandey M, Zhang JH, Mishra SK, Adikaram PR, Harris B, Kahler JF, Loshakov A, Sholevar R, Genis A, Kittock C et al (2017) A central role for R7bp in the regulation of itch sensation. *Pain* 158: 931-944 Doi 10.1097/j.pain.0000000000000860
- 142 Park H, Kim HJ, Jeon BS (2015) Parkinsonism in spinocerebellar ataxia. *Biomed Res Int* 2015: 125273 Doi 10.1155/2015/125273
- 143 Parker SE, Hanton AM, Stefanou SN, Noakes PG, Woodruff TM, Lee JD (2019) Revisiting the role of the innate immune complement system in ALS. *Neurobiol Dis* 127: 223-232 Doi 10.1016/j.nbd.2019.03.003
- 144 Paul S, Dansithong W, Figueroa KP, Scoles DR, Pulst SM (2018) Staufien1 links RNA stress granules and autophagy in a model of neurodegeneration. *Nat Commun* 9: 3648 Doi 10.1038/s41467-018-06041-3
- 145 Paulson HL, Shakkottai VG, Clark HB, Orr HT (2017) Polyglutamine spinocerebellar ataxias - from genes to potential treatments. *Nat Rev Neurosci* 18: 613-626 Doi 10.1038/nrn.2017.92

- 146 Pelosi L, Iodice R, Antenora A, Kilfoyle D, Mulroy E, Rodrigues M, Roxburgh R, Iovino A, Filla A, Manganelli F et al (2019) Spinocerebellar ataxia type 2-neuronopathy or neuropathy? *Muscle Nerve* 60: 271-278 Doi 10.1002/mus.26613
- 147 Pena-Altamira E, Prati F, Massenzio F, Virgili M, Contestabile A, Bolognesi ML, Monti B (2016) Changing paradigm to target microglia in neurodegenerative diseases: from anti-inflammatory strategy to active immunomodulation. *Expert Opin Ther Targets* 20: 627-640 Doi 10.1517/14728222.2016.1121237
- 148 Pereira KD, Tamborlin L, Meneguello L, de Proenca AR, Almeida IC, Lourenco RF, Luchessi AD (2016) Alternative Start Codon Connects eIF5A to Mitochondria. *J Cell Physiol* 231: 2682-2689 Doi 10.1002/jcp.25370
- 149 Perez MK, Paulson HL, Pendse SJ, Saionz SJ, Bonini NM, Pittman RN (1998) Recruitment and the role of nuclear localization in polyglutamine-mediated aggregation. *J Cell Biol* 143: 1457-1470 Doi 10.1083/jcb.143.6.1457
- 150 Ponomarev I, Maiya R, Harnett MT, Schafer GL, Ryabinin AE, Blednov YA, Morikawa H, Boehm SL, 2nd, Homanics GE, Berman AE et al (2006) Transcriptional signatures of cellular plasticity in mice lacking the alpha1 subunit of GABAA receptors. *J Neurosci* 26: 5673-5683 Doi 10.1523/JNEUROSCI.0860-06.2006
- 151 Porter FD, Herman GE (2011) Malformation syndromes caused by disorders of cholesterol synthesis. *J Lipid Res* 52: 6-34 Doi 10.1194/jlr.R009548
- 152 Puleston DJ, Buck MD, Klein Geltink RI, Kyle RL, Caputa G, O'Sullivan D, Cameron AM, Castoldi A, Musa Y, Kabat AM et al (2019) Polyamines and eIF5A Hypusination Modulate Mitochondrial Respiration and Macrophage Activation. *Cell Metab* 30: 352-363 e358 Doi 10.1016/j.cmet.2019.05.003
- 153 Pulst SM, Nechiporuk A, Nechiporuk T, Gispert S, Chen XN, Lopes-Cendes I, Pearlman S, Starkman S, Orozco-Diaz G, Lunke A et al (1996) Moderate expansion of a normally biallelic trinucleotide repeat in spinocerebellar ataxia type 2. *Nat Genet* 14: 269-276 Doi 10.1038/ng1196-269
- 154 Rademakers R, Neumann M, Mackenzie IR (2012) Advances in understanding the molecular basis of frontotemporal dementia. *Nat Rev Neurol* 8: 423-434 Doi 10.1038/nrneurol.2012.117
- 155 Ralser M, Albrecht M, Nonhoff U, Lengauer T, Lehrach H, Krobitsch S (2005) An integrative approach to gain insights into the cellular function of human ataxin-2. *J Mol Biol* 346: 203-214 Doi 10.1016/j.jmb.2004.11.024
- 156 Ralser M, Nonhoff U, Albrecht M, Lengauer T, Wanker EE, Lehrach H, Krobitsch S (2005) Ataxin-2 and huntingtin interact with endophilin-A complexes to function in platin-associated pathways. *Hum Mol Genet* 14: 2893-2909 Doi 10.1093/hmg/ddi321
- 157 Rameshwar P (2012) The tachykinergic system as avenues for drug intervention. *Recent Pat CNS Drug Discov* 7: 173-180
- 158 Ransdell JL, Dranoff E, Lau B, Lo WL, Donermeyer DL, Allen PM, Nerbonne JM (2017) Loss of Navbeta4-Mediated Regulation of Sodium Currents in Adult Purkinje Neurons Disrupts Firing and Impairs Motor Coordination and Balance. *Cell Rep* 19: 532-544 Doi 10.1016/j.celrep.2017.03.068
- 159 Reetz K, Rodriguez-Labrada R, Dogan I, Mirzazade S, Romanzetti S, Schulz JB, Cruz-Rivas EM, Alvarez-Cuesta JA, Aguilera Rodriguez R, Gonzalez Zaldivar Y et al (2018) Brain atrophy measures in preclinical and manifest spinocerebellar ataxia type 2. *Ann Clin Transl Neurol* 5: 128-137 Doi 10.1002/acn3.504
- 160 Riess O, Laccone FA, Gispert S, Schols L, Zuhlke C, Vieira-Saecker AM, Herlt S, Wessel K, Epplen JT, Weber BH et al (1997) SCA2 trinucleotide expansion in German SCA patients. *Neurogenetics* 1: 59-64
- 161 Rodriguez-Labrada R, Galicia-Polo L, Canales-Ochoa N, Voss U, Tuin I, Pena-Acosta A, Estupinan-Rodriguez A, Medrano-Montero J, Vazquez-Mojena Y, Gonzalez-Zaldivar Y et al (2019) Sleep spindles and K-complex activities are decreased in spinocerebellar ataxia type 2:

- relationship to memory and motor performances. *Sleep Med* 60: 188-196 Doi 10.1016/j.sleep.2019.04.005
- 162 Rodriguez-Labrada R, Velazquez-Perez L, Auburger G, Ziemann U, Canales-Ochoa N, Medrano-Montero J, Vazquez-Mojena Y, Gonzalez-Zaldivar Y (2016) Spinocerebellar ataxia type 2: Measures of saccade changes improve power for clinical trials. *Mov Disord* 31: 570-578 Doi 10.1002/mds.26532
- 163 Ross OA, Rutherford NJ, Baker M, Soto-Ortolaza AI, Carrasquillo MM, DeJesus-Hernandez M, Adamson J, Li M, Volkening K, Finger E et al (2011) Ataxin-2 repeat-length variation and neurodegeneration. *Hum Mol Genet* 20: 3207-3212 Doi 10.1093/hmg/ddr227
- 164 Rossi D, Galvao FC, Bellato HM, Boldrin PE, Andrews BJ, Valentini SR, Zanelli CF (2014) eIF5A has a function in the cotranslational translocation of proteins into the ER. *Amino Acids* 46: 645-653 Doi 10.1007/s00726-013-1618-6
- 165 Rub U, Brunt ER, Petrasch-Parwez E, Schols L, Theegarten D, Auburger G, Seidel K, Schultz C, Gierga K, Paulson H et al (2006) Degeneration of ingestion-related brainstem nuclei in spinocerebellar ataxia type 2, 3, 6 and 7. *Neuropathol Appl Neurobiol* 32: 635-649 Doi 10.1111/j.1365-2990.2006.00772.x
- 166 Rub U, Del Turco D, Del Tredici K, de Vos RA, Brunt ER, Reifenberger G, Seifried C, Schultz C, Auburger G, Braak H (2003) Thalamic involvement in a spinocerebellar ataxia type 2 (SCA2) and a spinocerebellar ataxia type 3 (SCA3) patient, and its clinical relevance. *Brain* 126: 2257-2272 Doi 10.1093/brain/awg234
- 167 Rub U, Schols L, Paulson H, Auburger G, Kermer P, Jen JC, Seidel K, Korf HW, Deller T (2013) Clinical features, neurogenetics and neuropathology of the polyglutamine spinocerebellar ataxias type 1, 2, 3, 6 and 7. *Prog Neurobiol* 104: 38-66 Doi 10.1016/j.pneurobio.2013.01.001
- 168 Rub U, Schultz C, Del Tredici K, Gierga K, Reifenberger G, de Vos RA, Seifried C, Braak H, Auburger G (2003) Anatomically based guidelines for systematic investigation of the central somatosensory system and their application to a spinocerebellar ataxia type 2 (SCA2) patient. *Neuropathol Appl Neurobiol* 29: 418-433 Doi 10.1046/j.1365-2990.2003.00504.x
- 169 Rub U, Seidel K, Ozerden I, Gierga K, Brunt ER, Schols L, de Vos RA, den Dunnen W, Schultz C, Auburger G et al (2007) Consistent affection of the central somatosensory system in spinocerebellar ataxia type 2 and type 3 and its significance for clinical symptoms and rehabilitative therapy. *Brain Res Rev* 53: 235-249 Doi 10.1016/j.brainresrev.2006.08.003
- 170 Rubino E, Mancini C, Boschi S, Ferrero P, Ferrone M, Bianca S, Zucca M, Orsi L, Pinessi L, Govone F et al (2019) ATXN2 intermediate repeat expansions influence the clinical phenotype in frontotemporal dementia. *Neurobiol Aging* 73: 231 e237-231 e239 Doi 10.1016/j.neurobiolaging.2018.09.009
- 171 Sangaraju D, Shahidi-Latham SK, Burgess BL, Dean B, Ding X (2017) A multi-matrix HILIC-MS/MS method for the quantitation of endogenous small molecule neurological biomarker N-acetyl aspartic acid (NAA). *J Pharm Biomed Anal* 140: 11-19 Doi 10.1016/j.jpba.2017.03.020
- 172 Satoh J, Yamamura T (2004) Gene expression profile following stable expression of the cellular prion protein. *Cell Mol Neurobiol* 24: 793-814
- 173 Satoh JI, Kino Y, Yanaizu M, Ishida T, Saito Y (2019) Microglia express GPNMB in the brains of Alzheimer's disease and Nasu-Hakola disease. *Intractable Rare Dis Res* 8: 120-128 Doi 10.5582/irdr.2019.01049
- 174 Satterfield TF, Jackson SM, Pallanck LJ (2002) A Drosophila homolog of the polyglutamine disease gene SCA2 is a dosage-sensitive regulator of actin filament formation. *Genetics* 162: 1687-1702
- 175 Satterfield TF, Pallanck LJ (2006) Ataxin-2 and its Drosophila homolog, ATX2, physically assemble with polyribosomes. *Hum Mol Genet* 15: 2523-2532 Doi 10.1093/hmg/ddl173
- 176 Schaaf CP, Koster J, Katsonis P, Kratz L, Shchelochkov OA, Scaglia F, Kelley RI, Lichtarge O, Waterham HR, Shinawi M (2011) Desmosterolosis-phenotypic and molecular

- characterization of a third case and review of the literature. *Am J Med Genet A* 155A: 1597-1604 Doi 10.1002/ajmg.a.34040
- 177 Scherzed W, Brunt ER, Heinsen H, de Vos RA, Seidel K, Burk K, Schols L, Auburger G, Del Turco D, Deller T et al (2012) Pathoanatomy of cerebellar degeneration in spinocerebellar ataxia type 2 (SCA2) and type 3 (SCA3). *Cerebellum* 11: 749-760 Doi 10.1007/s12311-011-0340-8
- 178 Schindelin J, Arganda-Carreras I, Frise E, Kaynig V, Longair M, Pietzsch T, Preibisch S, Rueden C, Saalfeld S, Schmid B et al (2012) Fiji: an open-source platform for biological-image analysis. *Nat Methods* 9: 676-682 Doi 10.1038/nmeth.2019
- 179 Schmittgen TD, Livak KJ (2008) Analyzing real-time PCR data by the comparative C(T) method. *Nat Protoc* 3: 1101-1108 Doi 10.1038/nprot.2008.73
- 180 Schols L, Gispert S, Vorgerd M, Menezes Vieira-Saecker AM, Blanke P, Auburger G, Amoiridis G, Meves S, Epplen JT, Przuntek H et al (1997) Spinocerebellar ataxia type 2. Genotype and phenotype in German kindreds. *Arch Neurol* 54: 1073-1080 Doi 10.1001/archneur.1997.00550210011007
- 181 Schols L, Reimold M, Seidel K, Globas C, Brockmann K, Hauser TK, Auburger G, Burk K, den Dunnen W, Reischl G et al (2015) No parkinsonism in SCA2 and SCA3 despite severe neurodegeneration of the dopaminergic substantia nigra. *Brain* 138: 3316-3326 Doi 10.1093/brain/awv255
- 182 Seidel G, Meierhofer D, Sen NE, Guenther A, Krobitch S, Auburger G (2017) Quantitative Global Proteomics of Yeast PBP1 Deletion Mutants and Their Stress Responses Identifies Glucose Metabolism, Mitochondrial, and Stress Granule Changes. *J Proteome Res* 16: 504-515 Doi 10.1021/acs.jproteome.6b00647
- 183 Seidel K, Siswanto S, Fredrich M, Bouzrou M, den Dunnen WFA, Ozerden I, Korf HW, Melegh B, de Vries JJ, Brunt ER et al (2017) On the distribution of intranuclear and cytoplasmic aggregates in the brainstem of patients with spinocerebellar ataxia type 2 and 3. *Brain Pathol* 27: 345-355 Doi 10.1111/bpa.12412
- 184 Sen NE, Arsovic A, Meierhofer D, Brodesser S, Oberschmidt C, Canet-Pons J, Kaya ZE, Halbach MV, Gispert S, Sandhoff K et al (submitted) In spino-cerebellar tissue, Ataxin-2 expansion affects ceramide-sphingomyelin metabolism. Doi 10.20944/preprints201911.0042.v1
- 185 Sen NE, Canet-Pons J, Halbach MV, Arsovic A, Pilatus U, Chae WH, Kaya ZE, Seidel K, Rollmann E, Mittelbronn M et al (2019) Generation of an Atxn2-CAG100 knock-in mouse reveals N-acetylaspartate production deficit due to early Nat8l dysregulation. *Neurobiol Dis* 132: 104559 Doi 10.1016/j.nbd.2019.104559
- 186 Sen NE, Drost J, Gispert S, Torres-Odio S, Damrath E, Klinkenberg M, Hamzeiy H, Akdal G, Gulluoglu H, Basak AN et al (2016) Search for SCA2 blood RNA biomarkers highlights Ataxin-2 as strong modifier of the mitochondrial factor PINK1 levels. *Neurobiol Dis* 96: 115-126 Doi 10.1016/j.nbd.2016.09.002
- 187 Sen NE, Gispert S, Auburger G (2017) PINK1 and Ataxin-2 as modifiers of growth. *Oncotarget* 8: 32382-32383 Doi 10.18632/oncotarget.16636
- 188 Shapouri F, Saeidi S, de Longh RU, Casagrande F, Western PS, McLaughlin EA, Sutherland JM, Hime GR, Familiari M (2016) Tob1 is expressed in developing and adult gonads and is associated with the P-body marker, Dcp2. *Cell Tissue Res* 364: 443-451 Doi 10.1007/s00441-015-2328-z
- 189 Shulman JM, Feany MB (2003) Genetic modifiers of tauopathy in *Drosophila*. *Genetics* 165: 1233-1242
- 190 Singh HN, Rajeswari MR (2015) Role of long purine stretches in controlling the expression of genes associated with neurological disorders. *Gene* 572: 175-183 Doi 10.1016/j.gene.2015.07.007
- 191 Singleton AB, Farrer M, Johnson J, Singleton A, Hague S, Kachergus J, Hulihan M, Peuralinna T, Dutra A, Nussbaum R et al (2003) alpha-Synuclein locus triplication causes Parkinson's disease. *Science* 302: 841 Doi 10.1126/science.1090278

- 192 Sirianni AC, Jiang J, Zeng J, Mao LL, Zhou S, Sugarbaker P, Zhang X, Li W, Friedlander RM, Wang X (2015) N-acetyl-l-tryptophan, but not N-acetyl-d-tryptophan, rescues neuronal cell death in models of amyotrophic lateral sclerosis. *J Neurochem* 134: 956-968 Doi 10.1111/jnc.13190
- 193 Sliter DA, Martinez J, Hao L, Chen X, Sun N, Fischer TD, Burman JL, Li Y, Zhang Z, Narendra DP et al (2018) Parkin and PINK1 mitigate STING-induced inflammation. *Nature* 561: 258-262 Doi 10.1038/s41586-018-0448-9
- 194 Susic-Jurjevic B, Lutjohann D, Renko K, Filipovic B, Radulovic N, Ajdzanovic V, Trifunovic S, Nestorovic N, Zivanovic J, Manojlovic Stojanoski M et al (2019) The isoflavones genistein and daidzein increase hepatic concentration of thyroid hormones and affect cholesterol metabolism in middle-aged male rats. *J Steroid Biochem Mol Biol* 190: 1-10 Doi 10.1016/j.jsbmb.2019.03.009
- 195 Stallings NR, Puttaparthi K, Dowling KJ, Luther CM, Burns DK, Davis K, Elliott JL (2013) TDP-43, an ALS linked protein, regulates fat deposition and glucose homeostasis. *PLoS One* 8: e71793 Doi 10.1371/journal.pone.0071793
- 196 Stamelou M, Charlesworth G, Cordvari C, Schneider SA, Kagi G, Sheerin UM, Rubio-Agusti I, Batla A, Houlden H, Wood NW et al (2014) The phenotypic spectrum of DYT24 due to ANO3 mutations. *Mov Disord* 29: 928-934 Doi 10.1002/mds.25802
- 197 Stribl C, Samara A, Trumbach D, Peis R, Neumann M, Fuchs H, Gailus-Durner V, Hrabe de Angelis M, Rathkolb B, Wolf E et al (2014) Mitochondrial dysfunction and decrease in body weight of a transgenic knock-in mouse model for TDP-43. *J Biol Chem* 289: 10769-10784 Doi 10.1074/jbc.M113.515940
- 198 Sudhakaran IP, Hillebrand J, Dervan A, Das S, Holohan EE, Hulsmeier J, Sarov M, Parker R, VijayRaghavan K, Ramaswami M (2014) FMRP and Ataxin-2 function together in long-term olfactory habituation and neuronal translational control. *Proc Natl Acad Sci U S A* 111: E99-E108 Doi 10.1073/pnas.1309543111
- 199 Tanaka H, Shimazawa M, Kimura M, Takata M, Tsuruma K, Yamada M, Takahashi H, Hozumi I, Niwa J, Iguchi Y et al (2012) The potential of GPNMB as novel neuroprotective factor in amyotrophic lateral sclerosis. *Sci Rep* 2: 573 Doi 10.1038/srep00573
- 200 Taylor JP, Brown RH, Jr., Cleveland DW (2016) Decoding ALS: from genes to mechanism. *Nature* 539: 197-206 Doi 10.1038/nature20413
- 201 Taylor LM, McMillan PJ, Liachko NF, Strovast TJ, Ghetti B, Bird TD, Keene CD, Kraemer BC (2018) Pathological phosphorylation of tau and TDP-43 by TTBK1 and TTBK2 drives neurodegeneration. *Mol Neurodegener* 13: 7 Doi 10.1186/s13024-018-0237-9
- 202 Thiagarajan D, Dev RR, Khosla S (2011) The DNA methyltransferase Dnmt2 participates in RNA processing during cellular stress. *Epigenetics* 6: 103-113 Doi 10.4161/epi.6.1.13418
- 203 Tollervey JR, Curk T, Rogelj B, Briese M, Cereda M, Kayikci M, Konig J, Hortobagyi T, Nishimura AL, Zupunski V et al (2011) Characterizing the RNA targets and position-dependent splicing regulation by TDP-43. *Nat Neurosci* 14: 452-458 Doi 10.1038/nn.2778
- 204 Toonen LJA, Overzier M, Evers MM, Leon LG, van der Zeeuw SAJ, Mei H, Kielbasa SM, Goeman JJ, Hettne KM, Magnusson OT et al (2018) Transcriptional profiling and biomarker identification reveal tissue specific effects of expanded ataxin-3 in a spinocerebellar ataxia type 3 mouse model. *Mol Neurodegener* 13: 31 Doi 10.1186/s13024-018-0261-9
- 205 Torres-Odio S, Key J, Hoepken HH, Canet-Pons J, Valek L, Roller B, Walter M, Morales-Gordo B, Meierhofer D, Harter PN et al (2017) Progression of pathology in PINK1-deficient mouse brain from splicing via ubiquitination, ER stress, and mitophagy changes to neuroinflammation. *J Neuroinflammation* 14: 154 Doi 10.1186/s12974-017-0928-0
- 206 Toyoshima Y, Tanaka H, Shimohata M, Kimura K, Morita T, Kakita A, Takahashi H (2011) Spinocerebellar ataxia type 2 (SCA2) is associated with TDP-43 pathology. *Acta Neuropathol* 122: 375-378 Doi 10.1007/s00401-011-0862-7
- 207 Uchihara T, Fujigasaki H, Koyano S, Nakamura A, Yagishita S, Iwabuchi K (2001) Non-expanded polyglutamine proteins in intranuclear inclusions of hereditary ataxias--triple-

- labeling immunofluorescence study. *Acta Neuropathol* 102: 149-152 Doi 10.1007/s004010100364
- 208 van de Loo S, Eich F, Nonis D, Auburger G, Nowock J (2009) Ataxin-2 associates with rough endoplasmic reticulum. *Exp Neurol* 215: 110-118 Doi 10.1016/j.expneurol.2008.09.020
- 209 van Meer G, de Kroon AI (2011) Lipid map of the mammalian cell. *J Cell Sci* 124: 5-8 Doi 10.1242/jcs.071233
- 210 Vejux A, Namsi A, Nury T, Moreau T, Lizard G (2018) Biomarkers of Amyotrophic Lateral Sclerosis: Current Status and Interest of Oxysterols and Phytosterols. *Front Mol Neurosci* 11: 12 Doi 10.3389/fnmol.2018.00012
- 211 Velazquez-Perez L, Garcia R, Santos FN, Paneque HM, Medina HE, Hechavarria PR (2001) [Hereditary ataxias in Cuba. Historical, epidemiological, clinical, electrophysiological and quantitative neurological features]. *Rev Neurol* 32: 71-76
- 212 Velazquez-Perez L, Rodriguez-Labrada R, Canales-Ochoa N, Montero JM, Sanchez-Cruz G, Aguilera-Rodriguez R, Almaguer-Mederos LE, Laffita-Mesa JM (2014) Progression of early features of spinocerebellar ataxia type 2 in individuals at risk: a longitudinal study. *Lancet Neurol* 13: 482-489 Doi 10.1016/S1474-4422(14)70027-4
- 213 Velazquez-Perez L, Rodriguez-Labrada R, Canales-Ochoa N, Sanchez-Cruz G, Fernandez-Ruiz J, Montero JM, Aguilera-Rodriguez R, Diaz R, Almaguer-Mederos LE, Truitz AP (2010) Progression markers of Spinocerebellar ataxia 2. A twenty years neurophysiological follow up study. *J Neurol Sci* 290: 22-26 Doi 10.1016/j.jns.2009.12.013
- 214 Velazquez-Perez L, Rodriguez-Labrada R, Torres-Vega R, Medrano Montero J, Vazquez-Mojena Y, Auburger G, Ziemann U (2016) Abnormal corticospinal tract function and motor cortex excitability in non-ataxic SCA2 mutation carriers: A TMS study. *Clin Neurophysiol* 127: 2713-2719 Doi 10.1016/j.clinph.2016.05.003
- 215 Velazquez-Perez L, Rodriguez-Labrada R, Torres-Vega R, Montero JM, Vazquez-Mojena Y, Auburger G, Ziemann U (2016) Central motor conduction time as prodromal biomarker in spinocerebellar ataxia type 2. *Mov Disord* 31: 603-604 Doi 10.1002/mds.26555
- 216 Velazquez-Perez L, Rodriguez-Labrada R, Torres-Vega R, Ortega-Sanchez R, Medrano-Montero J, Gonzalez-Pina R, Vazquez-Mojena Y, Auburger G, Ziemann U (2018) Progression of corticospinal tract dysfunction in pre-ataxic spinocerebellar ataxia type 2: A two-years follow-up TMS study. *Clin Neurophysiol* 129: 895-900 Doi 10.1016/j.clinph.2018.01.066
- 217 Velazquez-Perez L, Seifried C, Abele M, Wirjatijasa F, Rodriguez-Labrada R, Santos-Falcon N, Sanchez-Cruz G, Almaguer-Mederos L, Tejeda R, Canales-Ochoa N et al (2009) Saccade velocity is reduced in presymptomatic spinocerebellar ataxia type 2. *Clin Neurophysiol* 120: 632-635 Doi 10.1016/j.clinph.2008.12.040
- 218 Velazquez-Perez L, Seifried C, Santos-Falcon N, Abele M, Ziemann U, Almaguer LE, Martinez-Gongora E, Sanchez-Cruz G, Canales N, Perez-Gonzalez R et al (2004) Saccade velocity is controlled by polyglutamine size in spinocerebellar ataxia 2. *Ann Neurol* 56: 444-447 Doi 10.1002/ana.20220
- 219 Velazquez-Perez L, Tunnerhoff J, Rodriguez-Labrada R, Torres-Vega R, Belardinelli P, Medrano-Montero J, Pena-Acosta A, Canales-Ochoa N, Vazquez-Mojena Y, Gonzalez-Zaldivar Y et al (2017) Corticomuscular Coherence: a Novel Tool to Assess the Pyramidal Tract Dysfunction in Spinocerebellar Ataxia Type 2. *Cerebellum* 16: 602-606 Doi 10.1007/s12311-016-0827-4
- 220 Velazquez-Perez L, Tunnerhoff J, Rodriguez-Labrada R, Torres-Vega R, Ruiz-Gonzalez Y, Belardinelli P, Medrano-Montero J, Canales-Ochoa N, Gonzalez-Zaldivar Y, Vazquez-Mojena Y et al (2017) Early corticospinal tract damage in prodromal SCA2 revealed by EEG-EMG and EMG-EMG coherence. *Clin Neurophysiol* 128: 2493-2502 Doi 10.1016/j.clinph.2017.10.009
- 221 Velazquez-Perez L, Voss U, Rodriguez-Labrada R, Auburger G, Canales Ochoa N, Sanchez Cruz G, Galicia Polo L, Haro Valencia R, Aguilera Rodriguez R, Medrano Montero J et al (2011) Sleep disorders in spinocerebellar ataxia type 2 patients. *Neurodegener Dis* 8: 447-454 Doi 10.1159/000324374



- 222 Wadia NH, Swami RK (1971) A new form of heredo-familial spinocerebellar degeneration with slow eye movements (nine families). *Brain* 94: 359-374 Doi 10.1093/brain/94.2.359
- 223 Wang L, Aasly JO, Annesi G, Bardien S, Bozi M, Brice A, Carr J, Chung SJ, Clarke C, Crosiers D et al (2015) Large-scale assessment of polyglutamine repeat expansions in Parkinson disease. *Neurology* 85: 1283-1292 Doi 10.1212/WNL.0000000000002016
- 224 Waragai M, Lammers CH, Takeuchi S, Imafuku I, Udagawa Y, Kanazawa I, Kawabata M, Mouradian MM, Okazawa H (1999) PQBP-1, a novel polyglutamine tract-binding protein, inhibits transcription activation by Brn-2 and affects cell survival. *Hum Mol Genet* 8: 977-987 Doi 10.1093/hmg/8.6.977
- 225 Wechsler A, Brafman A, Shafir M, Heverin M, Gottlieb H, Damari G, Gozlan-Kelner S, Spivak I, Moshkin O, Fridman E et al (2003) Generation of viable cholesterol-free mice. *Science* 302: 2087 Doi 10.1126/science.1090776
- 226 West AP, Shadel GS (2017) Mitochondrial DNA in innate immune responses and inflammatory pathology. *Nat Rev Immunol* 17: 363-375 Doi 10.1038/nri.2017.21
- 227 White JP, Lloyd RE (2011) Poliovirus unlinks TIA1 aggregation and mRNA stress granule formation. *J Virol* 85: 12442-12454 Doi 10.1128/JVI.05888-11
- 228 Wishart TM, Rooney TM, Lamont DJ, Wright AK, Morton AJ, Jackson M, Freeman MR, Gillingwater TH (2012) Combining comparative proteomics and molecular genetics uncovers regulators of synaptic and axonal stability and degeneration in vivo. *PLoS Genet* 8: e1002936 Doi 10.1371/journal.pgen.1002936
- 229 Xie G, Harrison J, Clapcote SJ, Huang Y, Zhang JY, Wang LY, Roder JC (2010) A new Kv1.2 channelopathy underlying cerebellar ataxia. *J Biol Chem* 285: 32160-32173 Doi 10.1074/jbc.M110.153676
- 230 Xu D, Jin T, Zhu H, Chen H, Ofengeim D, Zou C, Mifflin L, Pan L, Amin P, Li W et al (2018) TBK1 Suppresses RIPK1-Driven Apoptosis and Inflammation during Development and in Aging. *Cell* 174: 1477-1491 e1419 Doi 10.1016/j.cell.2018.07.041
- 231 Yoh SM, Schneider M, Seifried J, Soonthornvacharin S, Akleh RE, Olivieri KC, De Jesus PD, Ruan C, de Castro E, Ruiz PA et al (2015) PQBP1 Is a Proximal Sensor of the cGAS-Dependent Innate Response to HIV-1. *Cell* 161: 1293-1305 Doi 10.1016/j.cell.2015.04.050
- 232 Yokoshi M, Li Q, Yamamoto M, Okada H, Suzuki Y, Kawahara Y (2014) Direct binding of Ataxin-2 to distinct elements in 3' UTRs promotes mRNA stability and protein expression. *Mol Cell* 55: 186-198 Doi 10.1016/j.molcel.2014.05.022
- 233 Yousef GM, Luo LY, Scherer SW, Sotiropoulou G, Diamandis EP (1999) Molecular characterization of zyme/protease M/neurosin (PRSS9), a hormonally regulated kallikrein-like serine protease. *Genomics* 62: 251-259 Doi 10.1006/geno.1999.6012
- 234 Yuan J, Amin P, Ofengeim D (2019) Necroptosis and RIPK1-mediated neuroinflammation in CNS diseases. *Nat Rev Neurosci* 20: 19-33 Doi 10.1038/s41583-018-0093-1
- 235 Zhang H, Alsaleh G, Feltham J, Sun Y, Napolitano G, Riffelmacher T, Charles P, Frau L, Hublitz P, Yu Z et al (2019) Polyamines Control eIF5A Hypusination, TFE3 Translation, and Autophagy to Reverse B Cell Senescence. *Mol Cell*: Doi 10.1016/j.molcel.2019.08.005
- 236 Zhang K, Daigle JG, Cunningham KM, Coyne AN, Ruan K, Grima JC, Bowen KE, Wadhwa H, Yang P, Rigo F et al (2018) Stress Granule Assembly Disrupts Nucleocytoplasmic Transport. *Cell* 173: 958-971 e917 Doi 10.1016/j.cell.2018.03.025
- 237 Zhang L, Haraguchi S, Koda T, Hashimoto K, Nakagawara A (2011) Muscle atrophy and motor neuron degeneration in human NEDL1 transgenic mice. *J Biomed Biotechnol* 2011: 831092 Doi 10.1155/2011/831092
- 238 Zhang XY, Qi J, Shen YQ, Liu X, Liu A, Zhou Z, Han J, Zhang ZC (2017) Mutations of PQBP1 in Renpenning syndrome promote ubiquitin-mediated degradation of FMRP and cause synaptic dysfunction. *Hum Mol Genet* 26: 955-968 Doi 10.1093/hmg/ddx010
- 239 Zhang YJ, Xu YF, Dickey CA, Buratti E, Baralle F, Bailey R, Pickering-Brown S, Dickson D, Petrucelli L (2007) Progranulin mediates caspase-dependent cleavage of TAR DNA binding protein-43. *J Neurosci* 27: 10530-10534 Doi 10.1523/JNEUROSCI.3421-07.2007

- 240 Zhao W, Beers DR, Bell S, Wang J, Wen S, Baloh RH, Appel SH (2015) TDP-43 activates microglia through NF-kappaB and NLRP3 inflammasome. *Exp Neurol* 273: 24-35 Doi 10.1016/j.expneurol.2015.07.019
- 241 Zieglgansberger W (2019) Substance P and pain chronicity. *Cell Tissue Res* 375: 227-241 Doi 10.1007/s00441-018-2922-y

**Tables:**

**Table 1: List of coding transcripts with dysregulation effect doubling over KIN lifespan.** Candidate progression markers were selected from global transcriptome profiles upon >1.2-fold expression change at 10 weeks versus  $\geq 2.4$ -fold change at 14 months of age in *Atxn2*-CAG100-KIN spinal cord. All such factors were downregulated, as illustrated by negative fold change effects. Significances shown were calculated by microarray Clariom D Transcriptome Analysis Console. Pathway component clusters are highlighted by colors, using red for cholesterol biosynthesis, purple for lipid metabolism, light green for axon, dark green for presynapse, gold for members of the ATXN2 interactome, rose for factors responsible for neurodegenerative disorders, beige for markers of distinct neuron populations. Authors' comments on pathway functions of disease implications are provided at the right margin.

**Supplementary Table S1: 10-week-old KIN spinal cord global transcriptome dysregulations >1.2-fold, assessed for pathway enrichments by STRING statistics.** Different datasheets are provided to document enrichment scores and individual factors involved, among GO terms Biological Process, Molecular Function, Cellular Component, PubMedID of Reference Publications, KEGG pathways, Reactome pathways, UniProt keywords, PFAM protein domains, InterPro protein domains and features, and SMART domains. Colors are used to highlight pathways that are prominent in STRING diagrams of Suppl. Figure S5A-B.

**Supplementary Table S2: 14-month-old KIN spinal cord global transcriptome dysregulations beyond 2-fold, assessed for pathway enrichments by STRING statistics.** Different datasheets are provided to document enrichment scores and individual factors involved, among GO terms Biological Process, Molecular Function, Cellular Component, PubMedID of Reference Publications, KEGG pathways, Reactome pathways, UniProt keywords, PFAM protein domains, InterPro protein domains and features, and SMART domains. Colors are used to highlight pathways that are prominent in STRING diagrams of Suppl. Figure S5C-D.

**Supplementary Table S3: KIN spinal cord global transcriptome dysregulations that doubled fold-change over lifespan, assessed for pathway enrichments by STRING statistics.** Different datasheets are provided to document enrichment scores and individual factors involved, among GO terms Biological Process, Molecular

Function, Cellular Component, PubMedID of Reference Publications, KEGG pathways, Reactome pathways, UniProt keywords, PFAM protein domains, InterPro protein domains and features, and SMART domains. Colors are used to highlight pathways that are prominent in STRING diagrams of Suppl. Figure S5E.

**Supplementary Table S4: Gas chromatographic quantification of cholesterol biosynthesis intermediate metabolites in 12-month-old *Atxn2*-CAG100-KIN spinal cord.** The datasheet shows genotype, animal identity numbers, gender, age, dry sample weight, absolute quantities of various precursor metabolites (black digits), cholesterol (blue digits) and derivative oxysterols (red digits), as well as ratios that were derived either from normalization versus mg dry weight, or versus  $\mu\text{g}$  cholesterol (blue field colors), or between two metabolites (grey fields). Average values (AVG) are shown below, together with significance p-values calculated by Student's t-test.

**Supplementary Table S5: RT-qPCR survey of expression changes among RNA-binding factors upon *ATXN2* mutations.** Diverse RNA-binding factors with roles in viral transcript repression, nuclear transcription and splicing, export and cytosolic trafficking, RNA quality control and decay were tested both in *Atxn2*-KO and CAG100-KIN cerebellum at advanced age. The table details the assays employed, gene symbols, nominal significance level for Student's t-test, number of animals, mean and standard error of the mean values. Red cell background highlights significant upregulations, blue color illustrates downregulations, bold letters emphasize two factors with significant dysregulation in both mutants.

## Figures:

**Figure 1: Functional assessment of hindlimb nerve function detects early sensory, predominantly axonal neuropathy.** Assessment of 5 male and 1 female *Atxn2*-CAG100-KnockIn (KIN) mice with age-/sex-matched wildtype controls at the age of 9-10 months showed (A) a weight reduction with significance for the male mutants. (B) Analyses of neurophysiology demonstrated sensory nerve conduction amplitudes and velocity (SNCV) from tail to be reduced and the perception of minimal intensity stimuli to be affected.

**Figure 2: ATXN2 protein aggregates in spinal motor neurons progressively sequester PABPC1 and TDP43.** Triple co-immunofluorescent staining of ATXN2 (green) versus PABPC1 or TDP43 (red) in *Atxn2*-CAG100-KIN (at 3, 6 or 14 months of age) versus *Atxn2*-KO mice (at 6 months) versus age-/sex-matched WT controls. The sequestration process co-localizes both proteins in cytosolic foci and produces a yellow signal in the merged panels. Nuclei were detected by DAPI (blue color), scale bar reflects 25  $\mu$ m.

**Figure 3: Validation of protein and mRNA level dysregulations.** (A) Quantitative immunoblots confirmed neuronal loss (marker NeuN), astrogliosis (marker GFAP) and microgliosis (marker IBA1) to occur in *Atxn2*-CAG100-KIN spinal cord at the preterminal stage of 14 months age, but not at the early KIN stage of 3 months age and in the *Atxn2*-KO at 6 months. Significantly increased levels in KIN at 14 months were also shown for TDP43 and the factor responsible for its cleavage, CASP3. (B) Quantitative RT-PCR analyses showed a significant deficit of NeuN transcript (*Rbfox3*) already at incipient disease stage in 3-month-old KIN, whereas astrogliosis (marker *Gfap*) and microgliosis (marker IBA1 transcript *Aif1*) became significant at late state. Protein abundance (C) and transcript levels (D) were also documented for PGRN (encoded by *Grn* mRNA) as molecular marker of lysosomal activation and atrophy, as well as RIPK1 as molecular marker of RNA-toxicity and necroptosis. Again, a significant elevation of *Grn* mRNA at the age of 3 months suggested atrophy and lysosomal breakdown to occur in parallel with first locomotor deficits, predating necroptotic cell death.

**Figure 4: Microglia is affected by ATXN2 aggregates in spinal cord and by cell-autonomous expression of ATXN2 *in vitro*.** Triple immunofluorescence of ATXN2 (green color) and IBA1 (red) in (A) spinal cord sections of 14-month-old *Atxn2*-CAG100-KIN versus sex-/age-matched shows anti-ATXN2 positive foci colocalizing

with IBA1 signals of microglia cells. Scale bar represents 25  $\mu\text{m}$ . In the microglial BV2 cell line **(B)**, diffuse anti-ATXN2 immunoreactivity in the cytosol showed progressive condensation into separate foci after 30 min NaArs treatment, in colocalization with PABPC1 signals, as typical stress granule features. In the merged panels, nuclei are visualized stained with DAPI (blue). Scale bar represents 50  $\mu\text{m}$ .

**Figure 5: Global transcriptome profiles of spinal cord at presymptomatic versus prefinal stage.** **(A)** This scheme depicts the general approach to survey molecular impact of polyQ-expansion in the RNA-binding protein ATXN2 at the global transcriptome level in unbiased manner. Spinal cord tissue from 3 homozygous *Atxn2*-CAG100-KIN versus 3 age-/sex-matched WT mice was used to extract high-integrity RNA. Hybridization signals were quantified from >214,000 oligonucleotides representing practically each exon from coding mRNAs, as well as microRNAs and lncRNAs. Automated statistics and pathway enrichment analysis was performed by the Clariom Transcriptome Analysis Console (TAC). **(B)** Results at the age of 10 weeks showed a clear separation of WT and mutant profiles upon principal component analysis (above, WT red dots, KIN blue dots) and significant expression dysregulation by >20% for 6.95% of all genes. **(C)** Results at the age of 14 months also showed a clear separation of WT and mutant profiles upon PCA. Expression dysregulation affected 9.46% of all genes, with a strongly increased number of upregulations.

**Figure 6: Cholesterol biosynthesis pathways show suppressed expression of enzymes and deficient metabolism intermediates in KIN spinal cord.** In this schematic presentation of cholesterol biosynthesis via lathosterol and via desmosterol, significant transcriptional downregulations of various enzymes are highlighted in red letters for each gene symbol and each fold-change. The quantification of several intermediate metabolites is illustrated by bar graphs. The gas chromatography analysis was performed in 12-month-old spinal cord from 7 WT versus 4 KIN mice, see Suppl. Table S5.

**Supplementary Figure S1: Functional assessment of hindlimb nerve function cannot demonstrate motor dysfunction at the age of 9-10 months.** **(A)** Neurophysiological assessment of 5 male and 1 female mutants with age-/sex-matched wildtype controls failed to detect motor neuropathy for sciatic nerve in lower limbs. Upon

electromyography (EMG), no muscle denervation potentials were observed in hindlimb muscles. **(B)** RT-qPCR analyses of acetylcholine receptor isoforms in tibialis anterior and soleus muscle tissue as markers of denervation showed no major dysregulation in CAG100-KIN animals.

**Supplementary Figure S2: ATXN2 protein aggregates in spinal motor neurons sequester TIA1.** Triple co-immunofluorescent staining of ATXN2 (green) versus TIA1 (red) in *Atnx2*-CAG100-KIN mice (at 14 months of age) versus age-/sex-matched WT controls. Nuclei were detected by DAPI (blue color), scale bar reflects 25  $\mu$ m.

**Supplementary Figure S3: Activation of immune pathways is observed in KIN spinal cord at the preterminal stage.** **(A)** RT-qPCR analyses of microglial Toll-like receptor isoforms *Tlr3*, *Tlr7* and *Tlr9*, together with complement factors *Clqa*, *Clqb*, *Clqc* and *C3* showed significant increases at the age of 14 months. **(B)** Quantitative immunoblot of polyglutamine-binding-protein 1 (PQBPI), as a sensor of toxic RNA/DNA and immune activator, showed increased protein levels at 14 months.

**Supplementary Figure S4: Activation of microglia in KIN spinal cord has pro-inflammatory toxic features.** In order to dissect the mode of microglial activation (whether it has anti- or pro-inflammatory nature), RT-qPCR analyses were performed to measure the transcript levels of *Trem2* and *Tyrobp* as markers of protective anti-inflammatory efforts, as well as *Irak4* and *Cybb* as markers of toxic pro-inflammatory activation. All transcripts were found upregulated at the preterminal stage of 14 months, with the highest induction of *Cybb* indicating a stronger pro-inflammatory state of microglia.

**Supplementary Figure S5: STRING bioinformatics plots of protein-protein-interaction clusters among KIN spinal cord transcriptome dysregulations.** For incipient disease stages at the age of 10 weeks, 1.2-fold dysregulations were analysed in the first two images. **(A)** Upregulations included *Pabpc1*, other translation initiation factors (e.g. *Eif1*), RNA helicases (e.g. *Ddx17*), spliceosomal factors (e.g. *Srsf3*, *Snrpc*), (manually placed below and right from the center image), RNA degradation enzymes (e.g. *Cnot6*), ribonucleoprotein components (e.g. *Tial*, *Hnrnpa2b1*), ribosome subunits (e.g. *Rps2*), histone components (e.g. *Hist1h2af*), among

many “nucleic acid binding factors” (highlighted as blue bullets). Upregulations also included factors with “acetylation” (yellow) and in the “inner mitochondrial membrane protein complex”. **(B)** Downregulations included two translation initiation factors (*Eif5a2*, *Eif2ak1*), several “protein tyrosine kinase” members (e.g. *Ntrk2*) with their downstream effectors such as MAP kinases (e.g. *Mapk9*) and CAM kinases (e.g. *Camkv*) (manually placed below and left from the center image, as light blue bullets). Downregulations also involved axonal (light green) and synaptic (dark green) factors, in particular many potassium channels (e.g. *Kcnj10*, *Kctd3*, in image center). Moreover, they concerned “cholesterol biosynthesis” enzymes (red bullets, e.g. *Sqle*) and “metabolism of lipids” (purple, e.g. *Acs16*, *Stard1*). Given that too many factors showed 1.2-fold dysregulation, STRING bioinformatics at the preterminal stage was performed for 2-fold dysregulations. **(C)** Upregulations in spinal cord at 14 months included many “immune system process” components (blue bullets, particularly microglia factors, e.g. *Trem2* below center) and “lysosome” factors (yellow). **(D)** Downregulations at 14 months again concerned axonal (light green) and synaptic (dark green) factors, in particular many potassium channels (orange bullets, manually clustered in center). In addition, “sterol biosynthetic process” components (red color) were again affected, and the “metabolism of lipids” (purple). **(E)** As candidate markers of disease progression, any transcriptome dysregulation that progressed from 1.2-fold at 10 weeks to 2.4-fold at 14 months was assessed for significant pathway enrichments. The same colors as previously visualize the factors of “sterol biosynthetic process” (red), “lipid metabolism” (purple), “axon” (light green), “presynapse” (dark green), “potassium channel tetramerisation-type BTB domain” (orange). In addition, “neurotransmitter transport” (light blue), “endoplasmic reticulum subcompartment” (yellow), “plasma membrane” (dark violet), “cytoplasmic ribonucleoprotein granule” (brown) and “cell junction” (dark blue) were highlighted because of their enrichments. The significance levels and less prominent pathways are detailed in Suppl. Tables S1/2/3.

**Supplementary Figure S6: Pathway enrichment survey by Affymetrix Clariom D Transcriptome Analysis Console in 10-week-old KIN spinal cord.** Significant pathways are shown in predefined schemes, highlighting upregulations by red background and downregulation by green background, with color intensity reflecting the effect size. The pathways at incipient disease stage included “Calcium regulation in the cardiac cell” (significance 5.0), “Cytoplasmic ribosomal proteins” (0.1), “Cholesterol metabolism” (2.7), “Regulation of actin cytoskeleton” (7.7), “Mapk signaling” (4.2), “Insulin signaling” (4.2), “Focal adhesion-Pi3k-Akt-mTOR-signaling” (1.2), “Egfr1 signaling pathway” (2.0), “mRNA processing” (3.9), “Adipogenesis genes” (0.2), and “Spinal cord injury” (significance 0.1).



**Supplementary Figure S7: Pathway enrichment survey by Affymetrix Clariom D Transcriptome Analysis**

**Console in 14-month-old KIN spinal cord.** Significant pathways are shown in predefined schemes, highlighting upregulations by red background and downregulation by green background, with color intensity reflecting the effect size. The pathways at preterminal stage included microglia (e.g. “Tyrobp causal network” with significance 10, “MicrogliaPathogenPhagocytosis” with significance 7.3) and inflammation (“B cell receptor signaling” with significance 9.3). Similar to incipient age, also “Calcium regulation in the cardiac cell” (significance 8.7), “Cytoplasmic ribosomal proteins” (6.1), “Cholesterol metabolism” (5.3), “Regulation of actin cytoskeleton” (3.4), “Mapk signaling” (3.3), “Insulin signaling” (2.6), “Focal adhesion-Pi3k-Akt-mTOR-signaling” (2.6), “Egfr1 signaling” (1.9), mRNA processing (1.5), “Adipogenesis genes” (1.3), and “Spinal cord injury” (3.0) were detected.

**Supplementary Figure S8: Global transcriptome profile of 14-month-old KIN spinal cord presented as volcano plot, highlighting key factors of pathogenesis, (A) concerning RNA toxicity, (B) concerning proteins responsible for ALS variants, (C) concerning proteins responsible for ataxia variants.**

The fold change of protein abundance is shown on the X-axis (filtering cut-off 1.2-fold), the negative logarithm of the nominal p-value is shown on the Y-axis (significance cut-off at 1.3 corresponds to  $p=0.05$ ). Upregulated factors are shown in red, downregulations in blue color.

**Supplementary Figure S9: Additional validations of the high-throughput transcriptome data confirm the dysregulations in inflammation, sensory, motor and cholesterol pathways.**

Quantitative RT-PCR analyses were performed to assess the expression levels of *Rnaset2* and *Gpnmb* in the RNA toxicity and inflammation pathway, *Unc80* and *Tacr1* within sensory neuropathy, *Ano3*, *Cdr1*, *Kif5a*, *Ttbk2*, *Kcna1*, *Kcna2* and *Scn4b* within dystonia-ataxia-ALS-tauopathy-axonopathy pathogenesis, *Cyp46a1* as a component of cholesterol turnover, and *Hmgcs1*, *Dhcr24*, *Msmo1* and *Cyp51a1* as enzymes for cholesterol biosynthesis.

**A**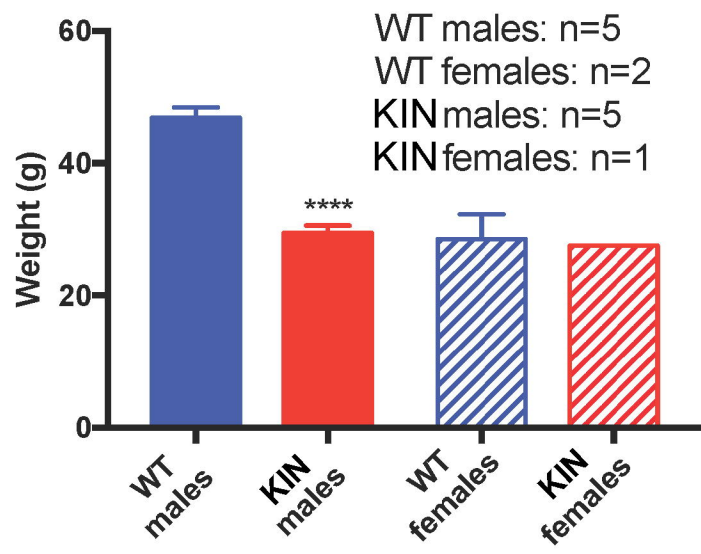**B**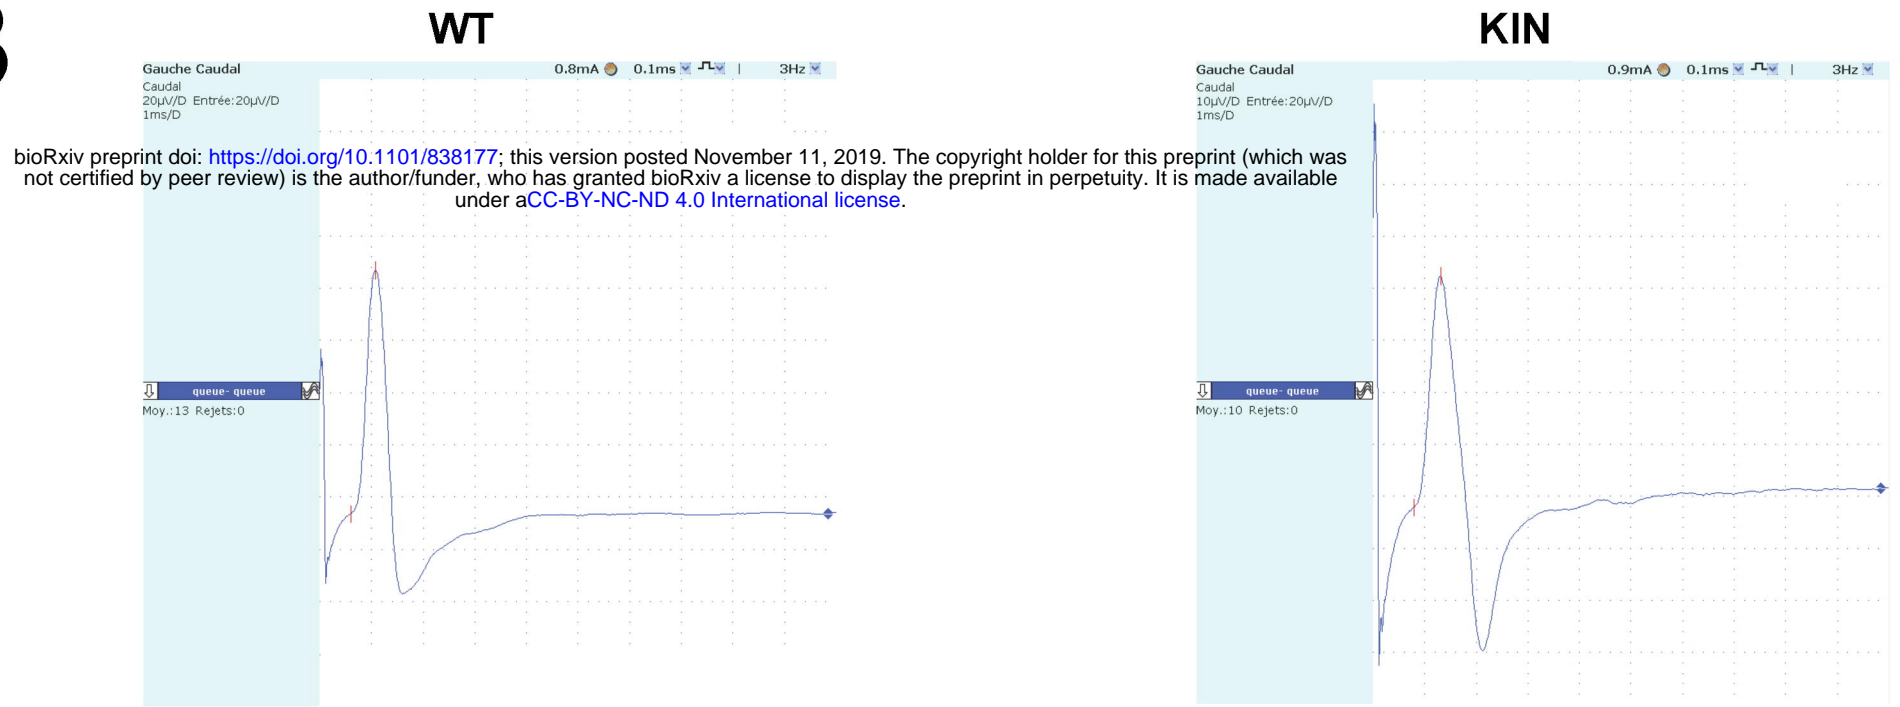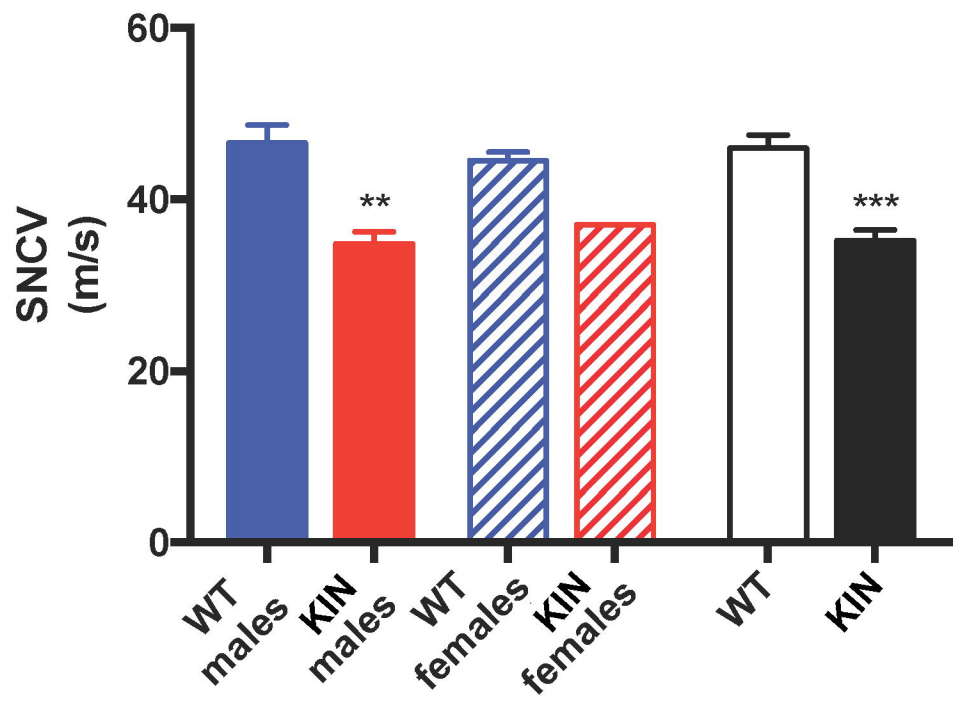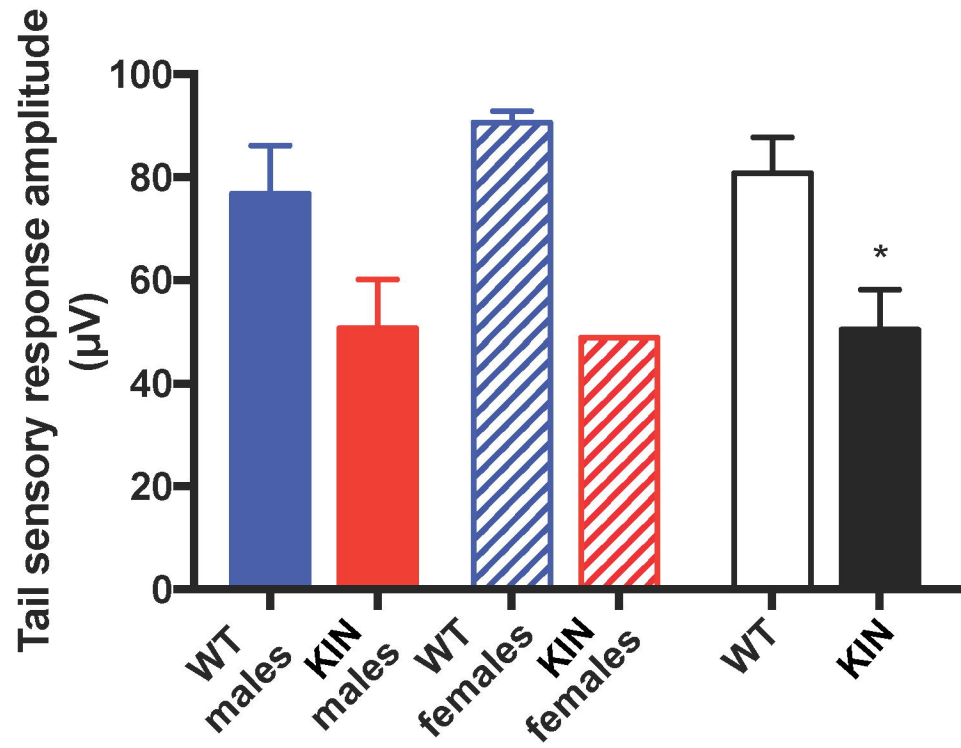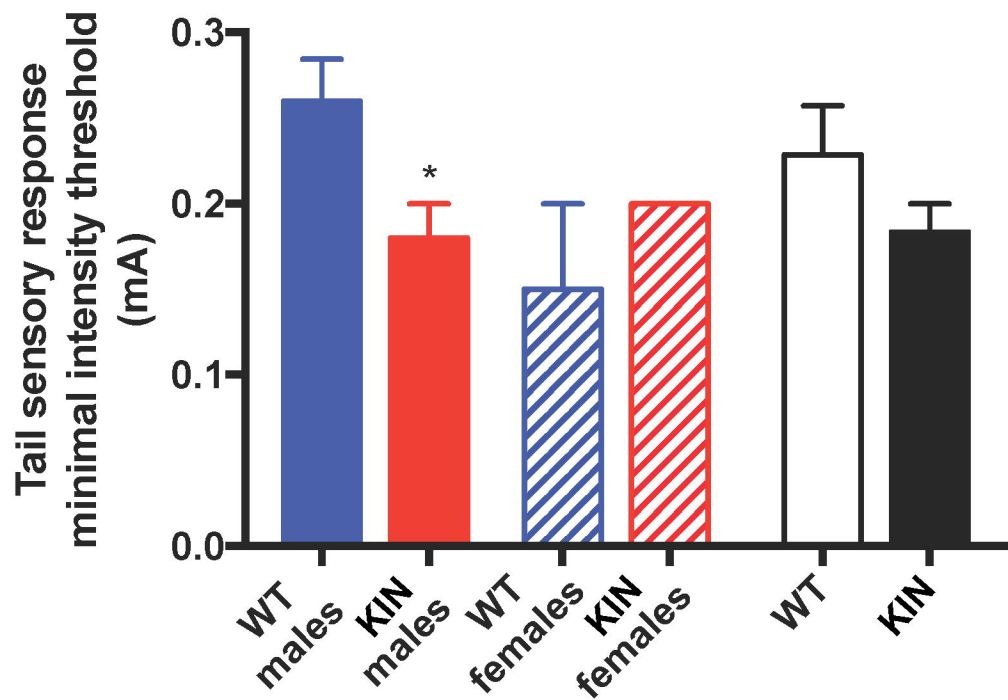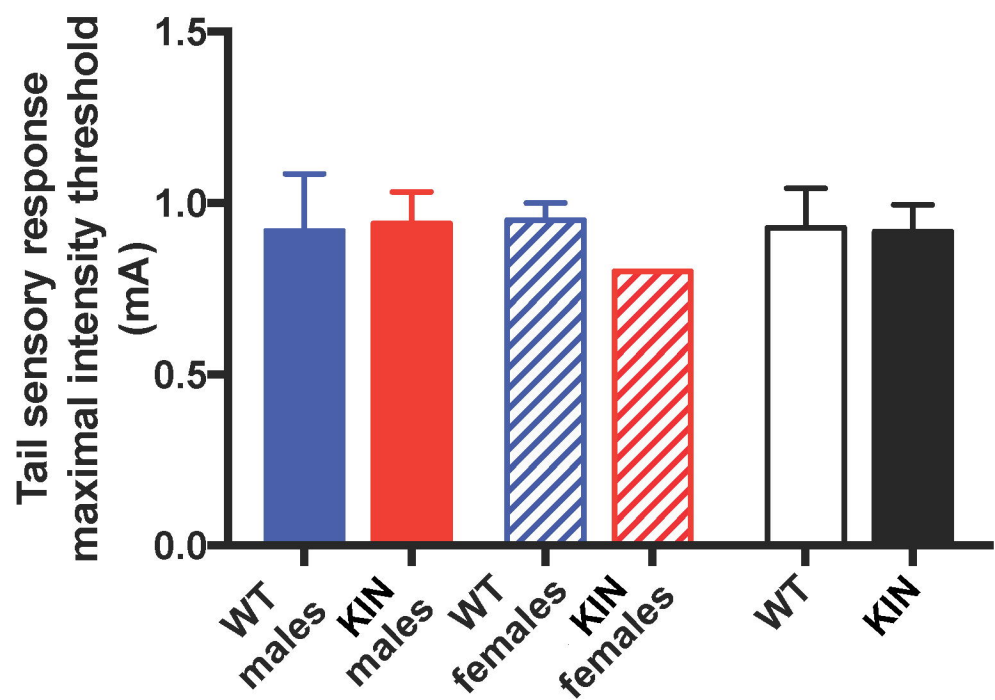



**ATXN2 PABPC1 DAPI****ATXN2 TDP43 DAPI**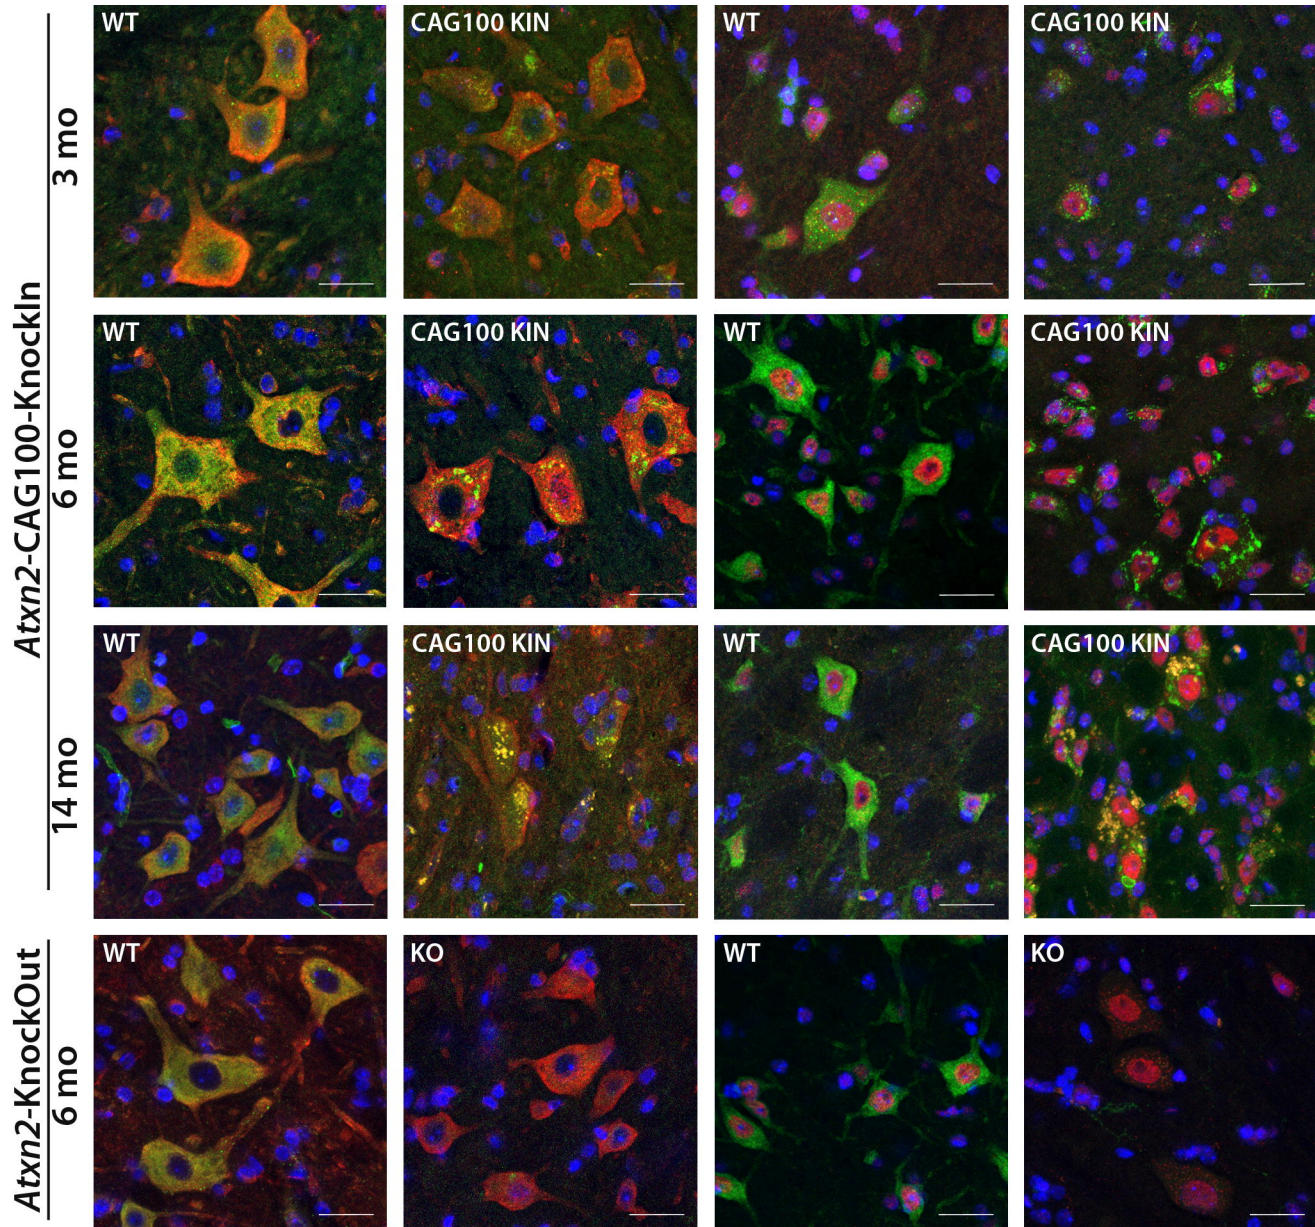

**A**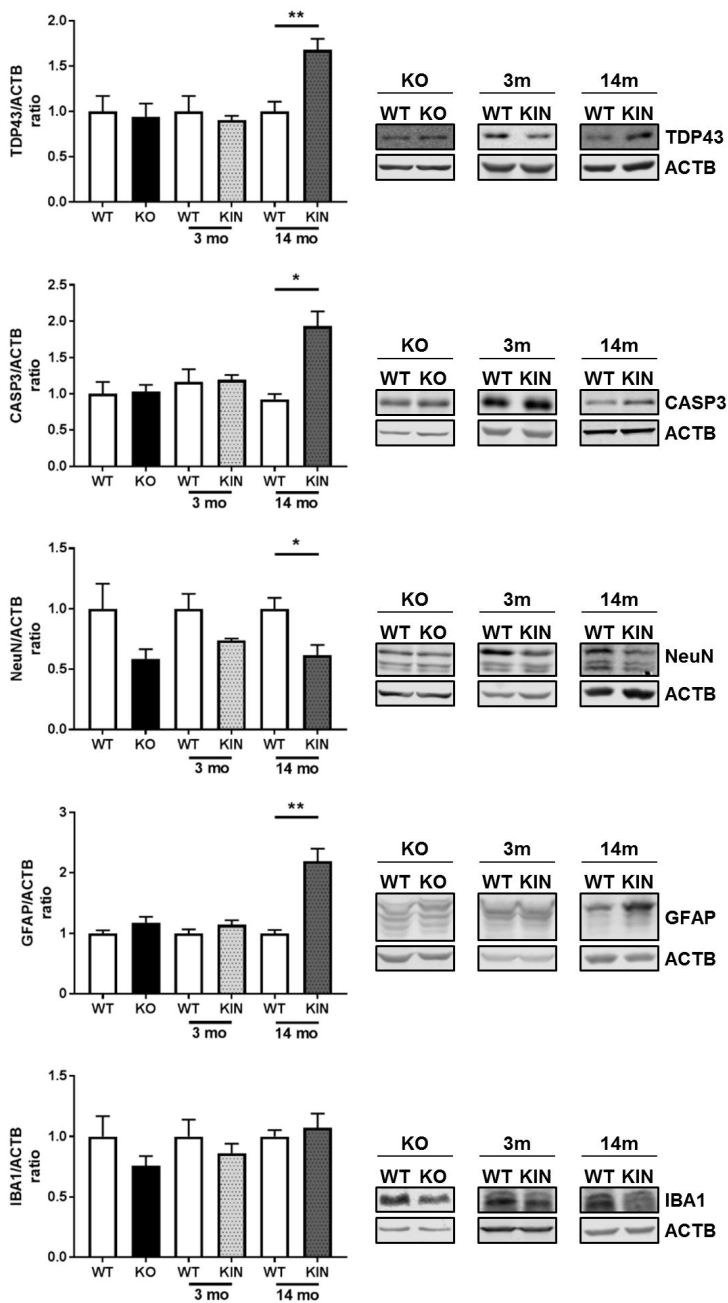**B**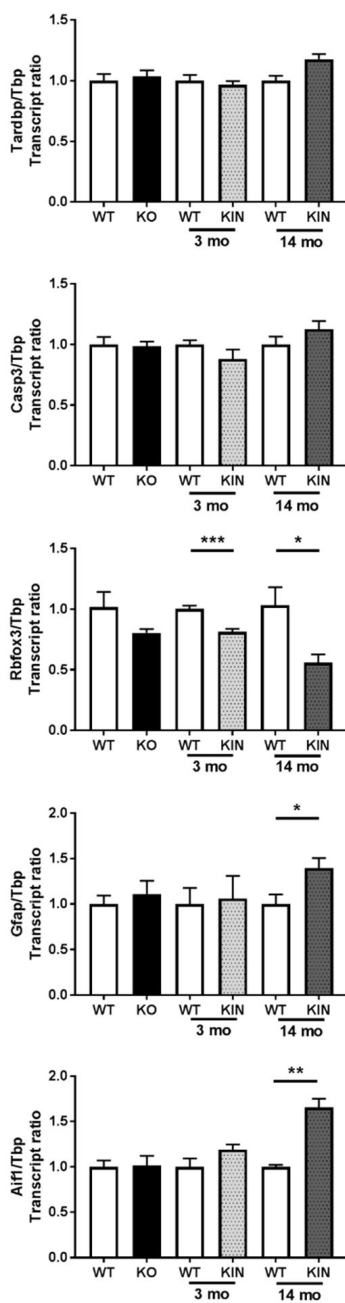**C**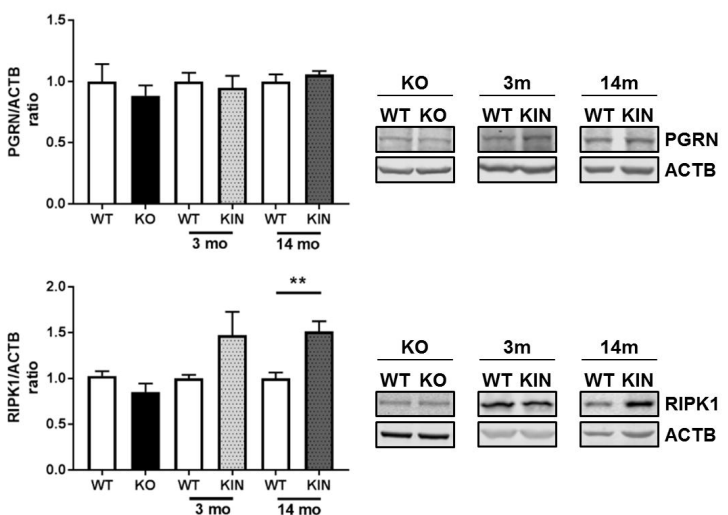**D**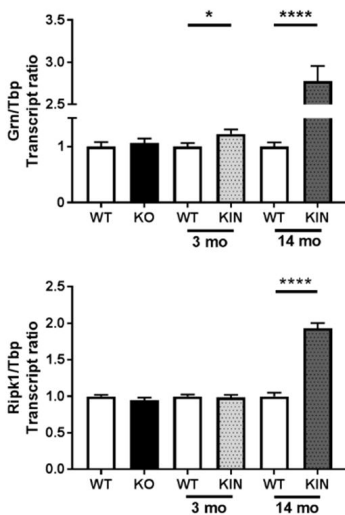



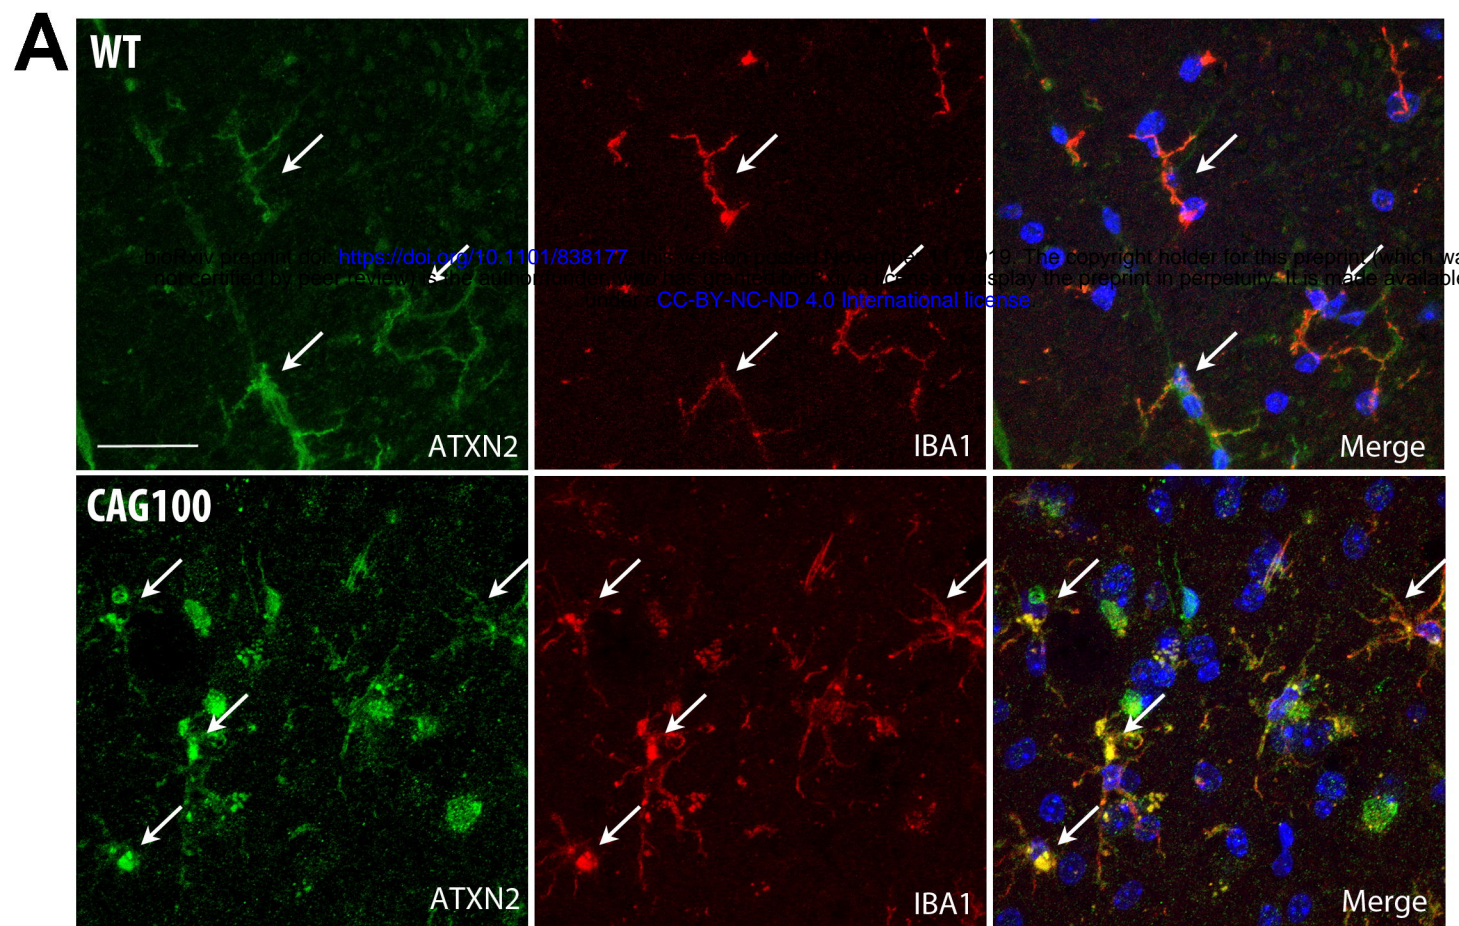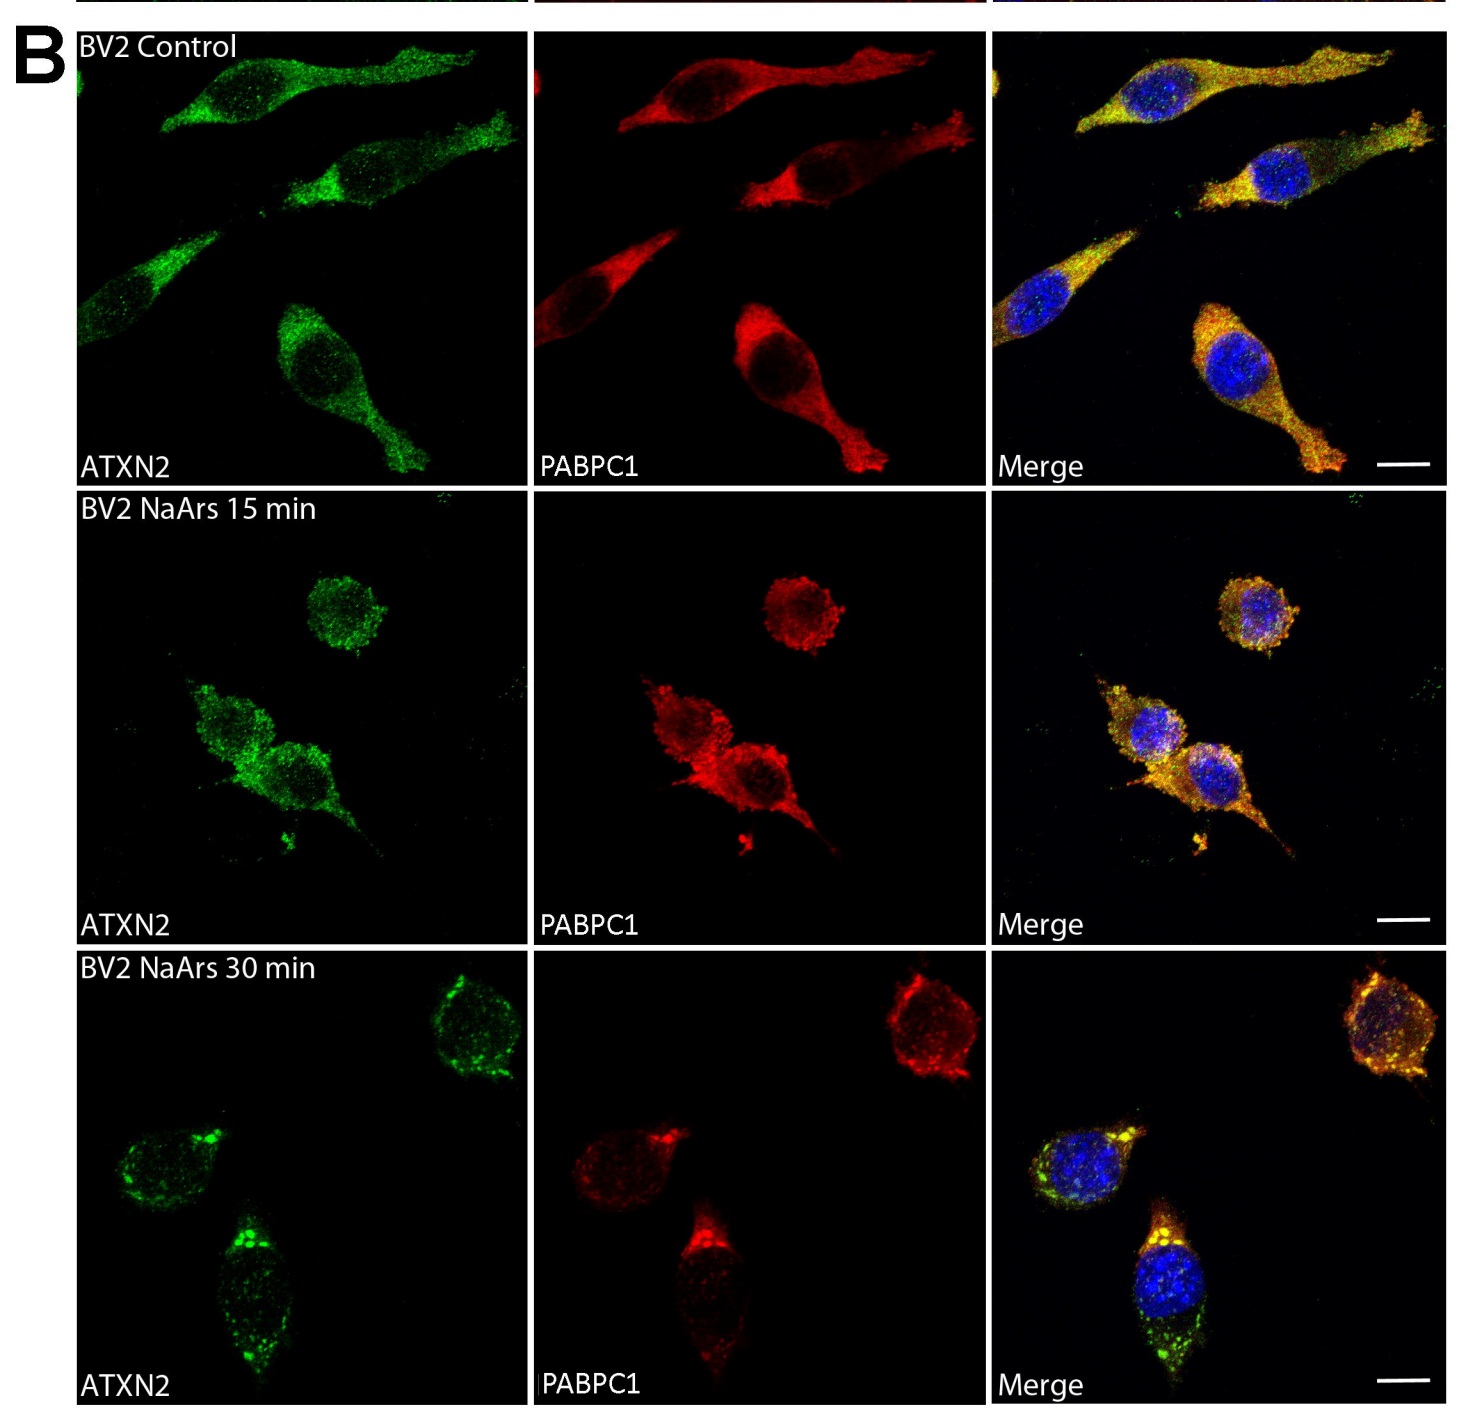



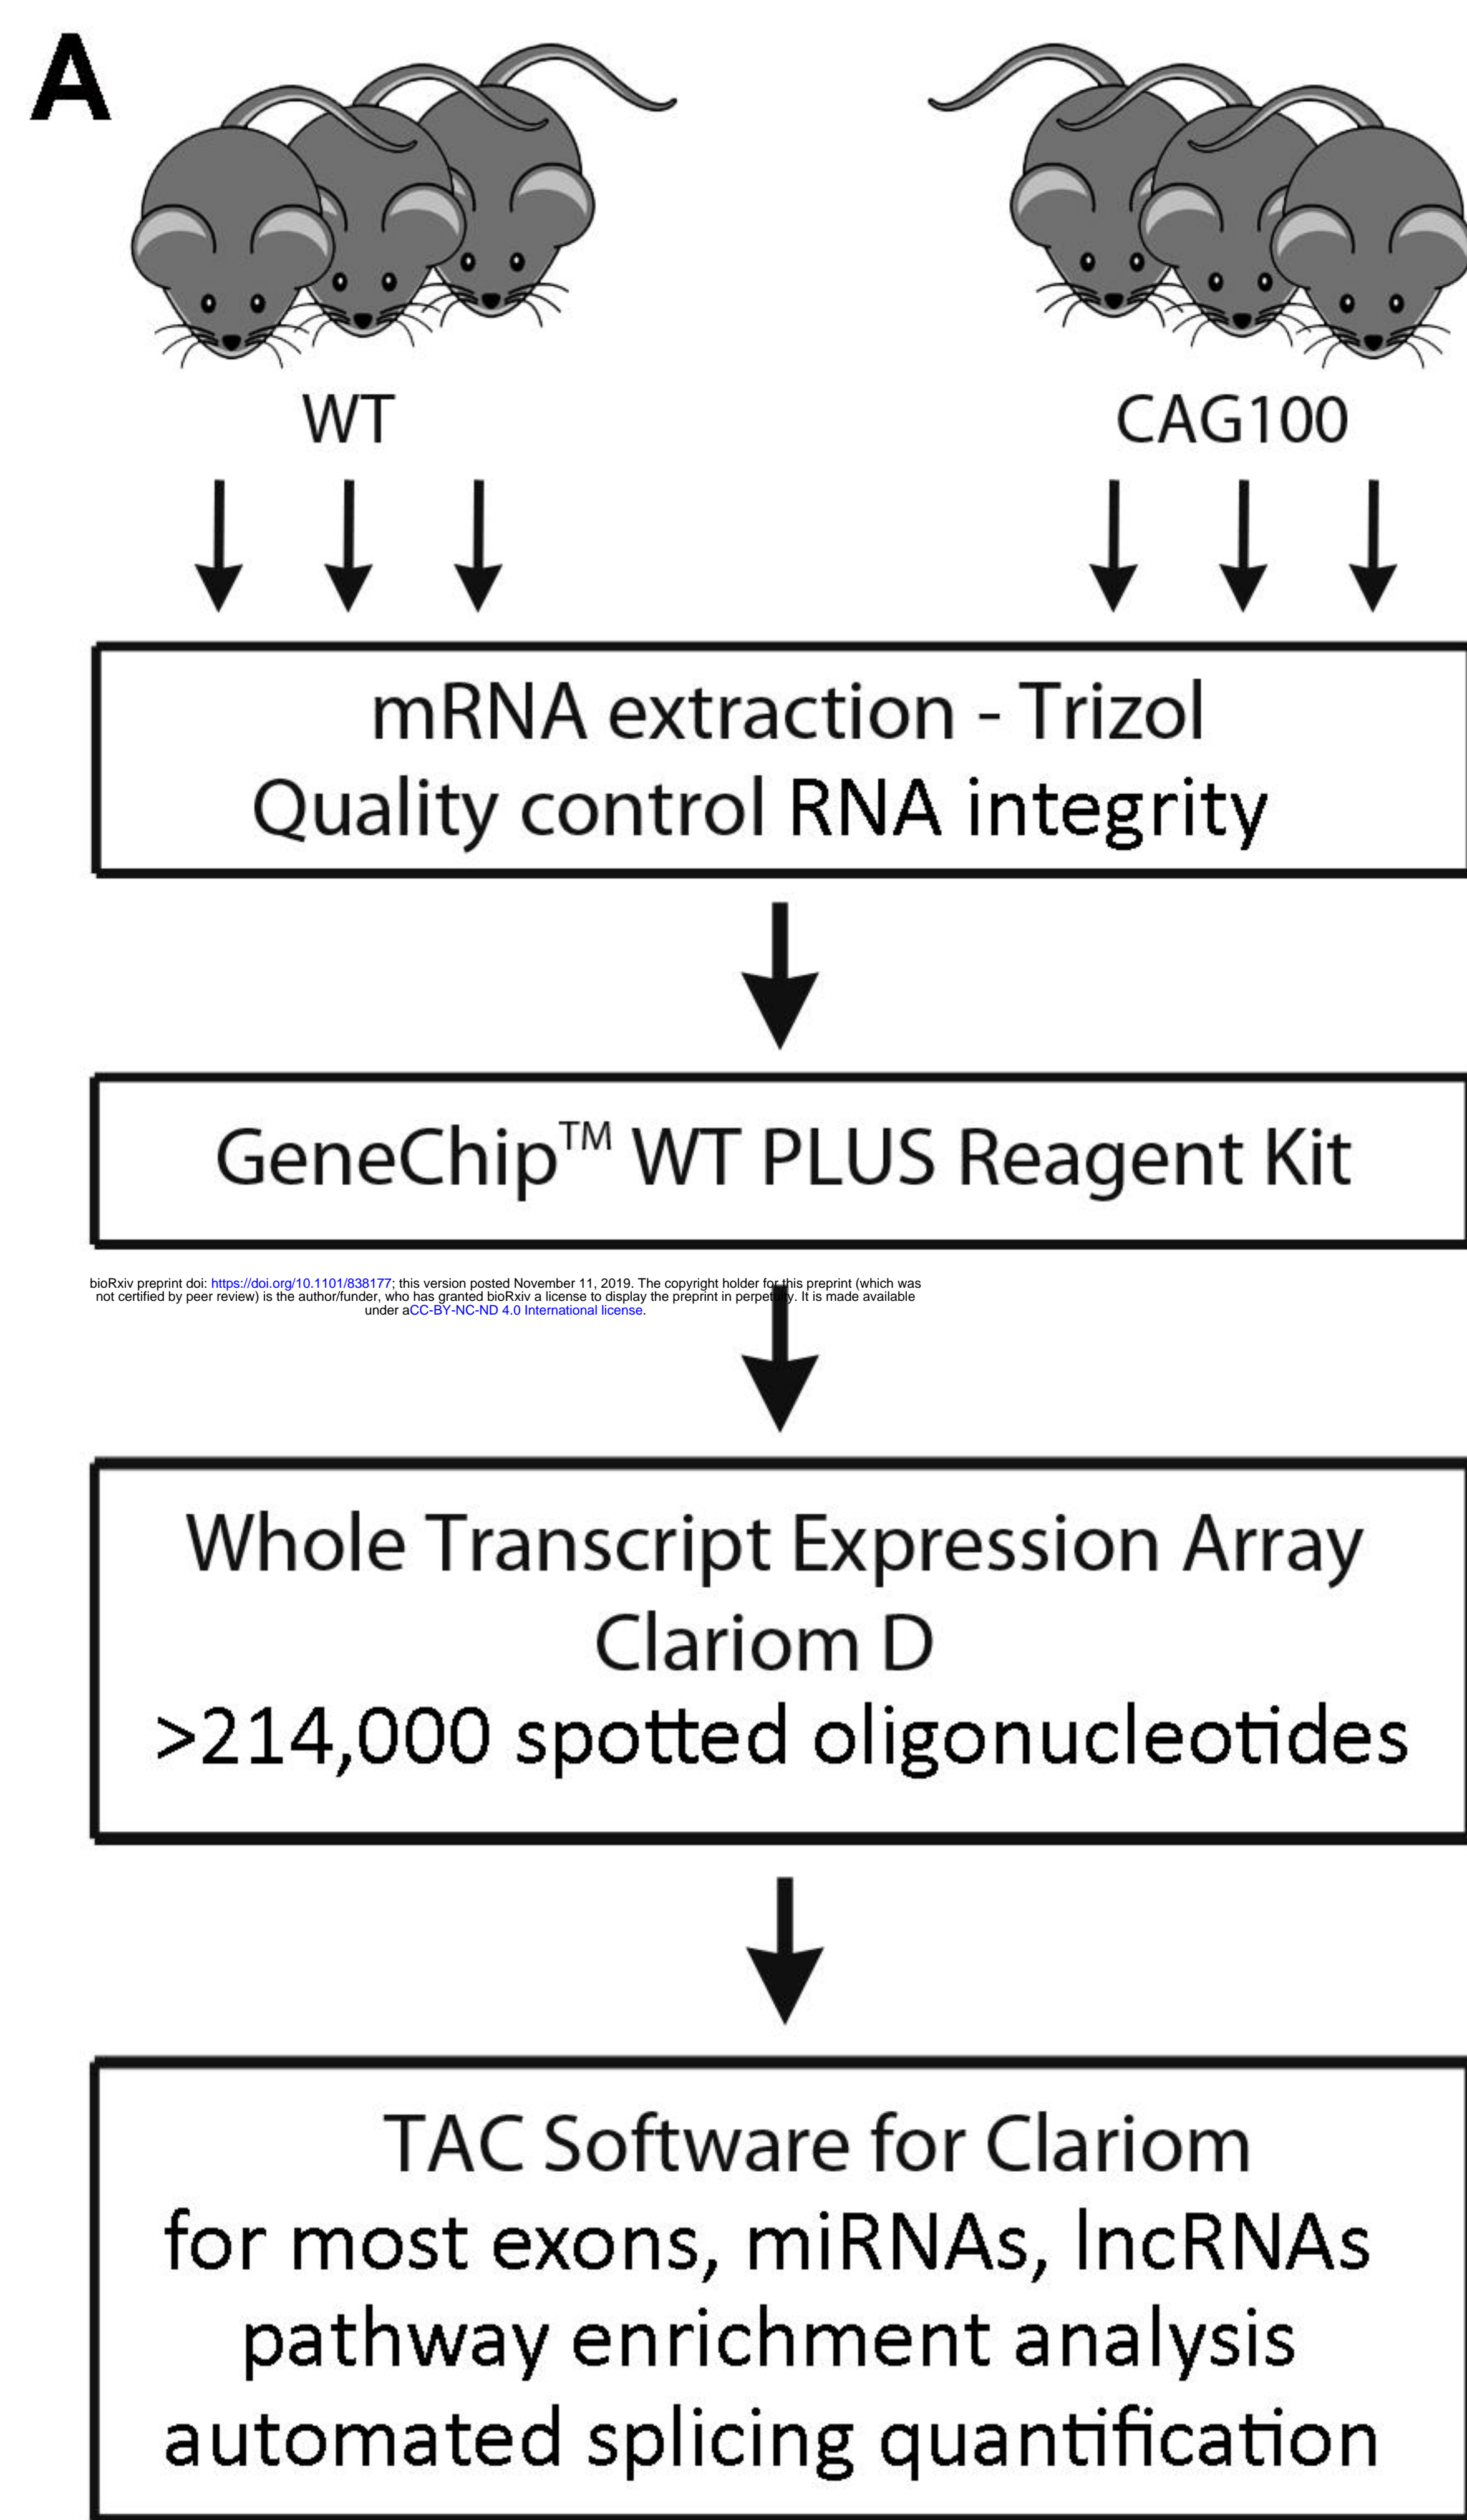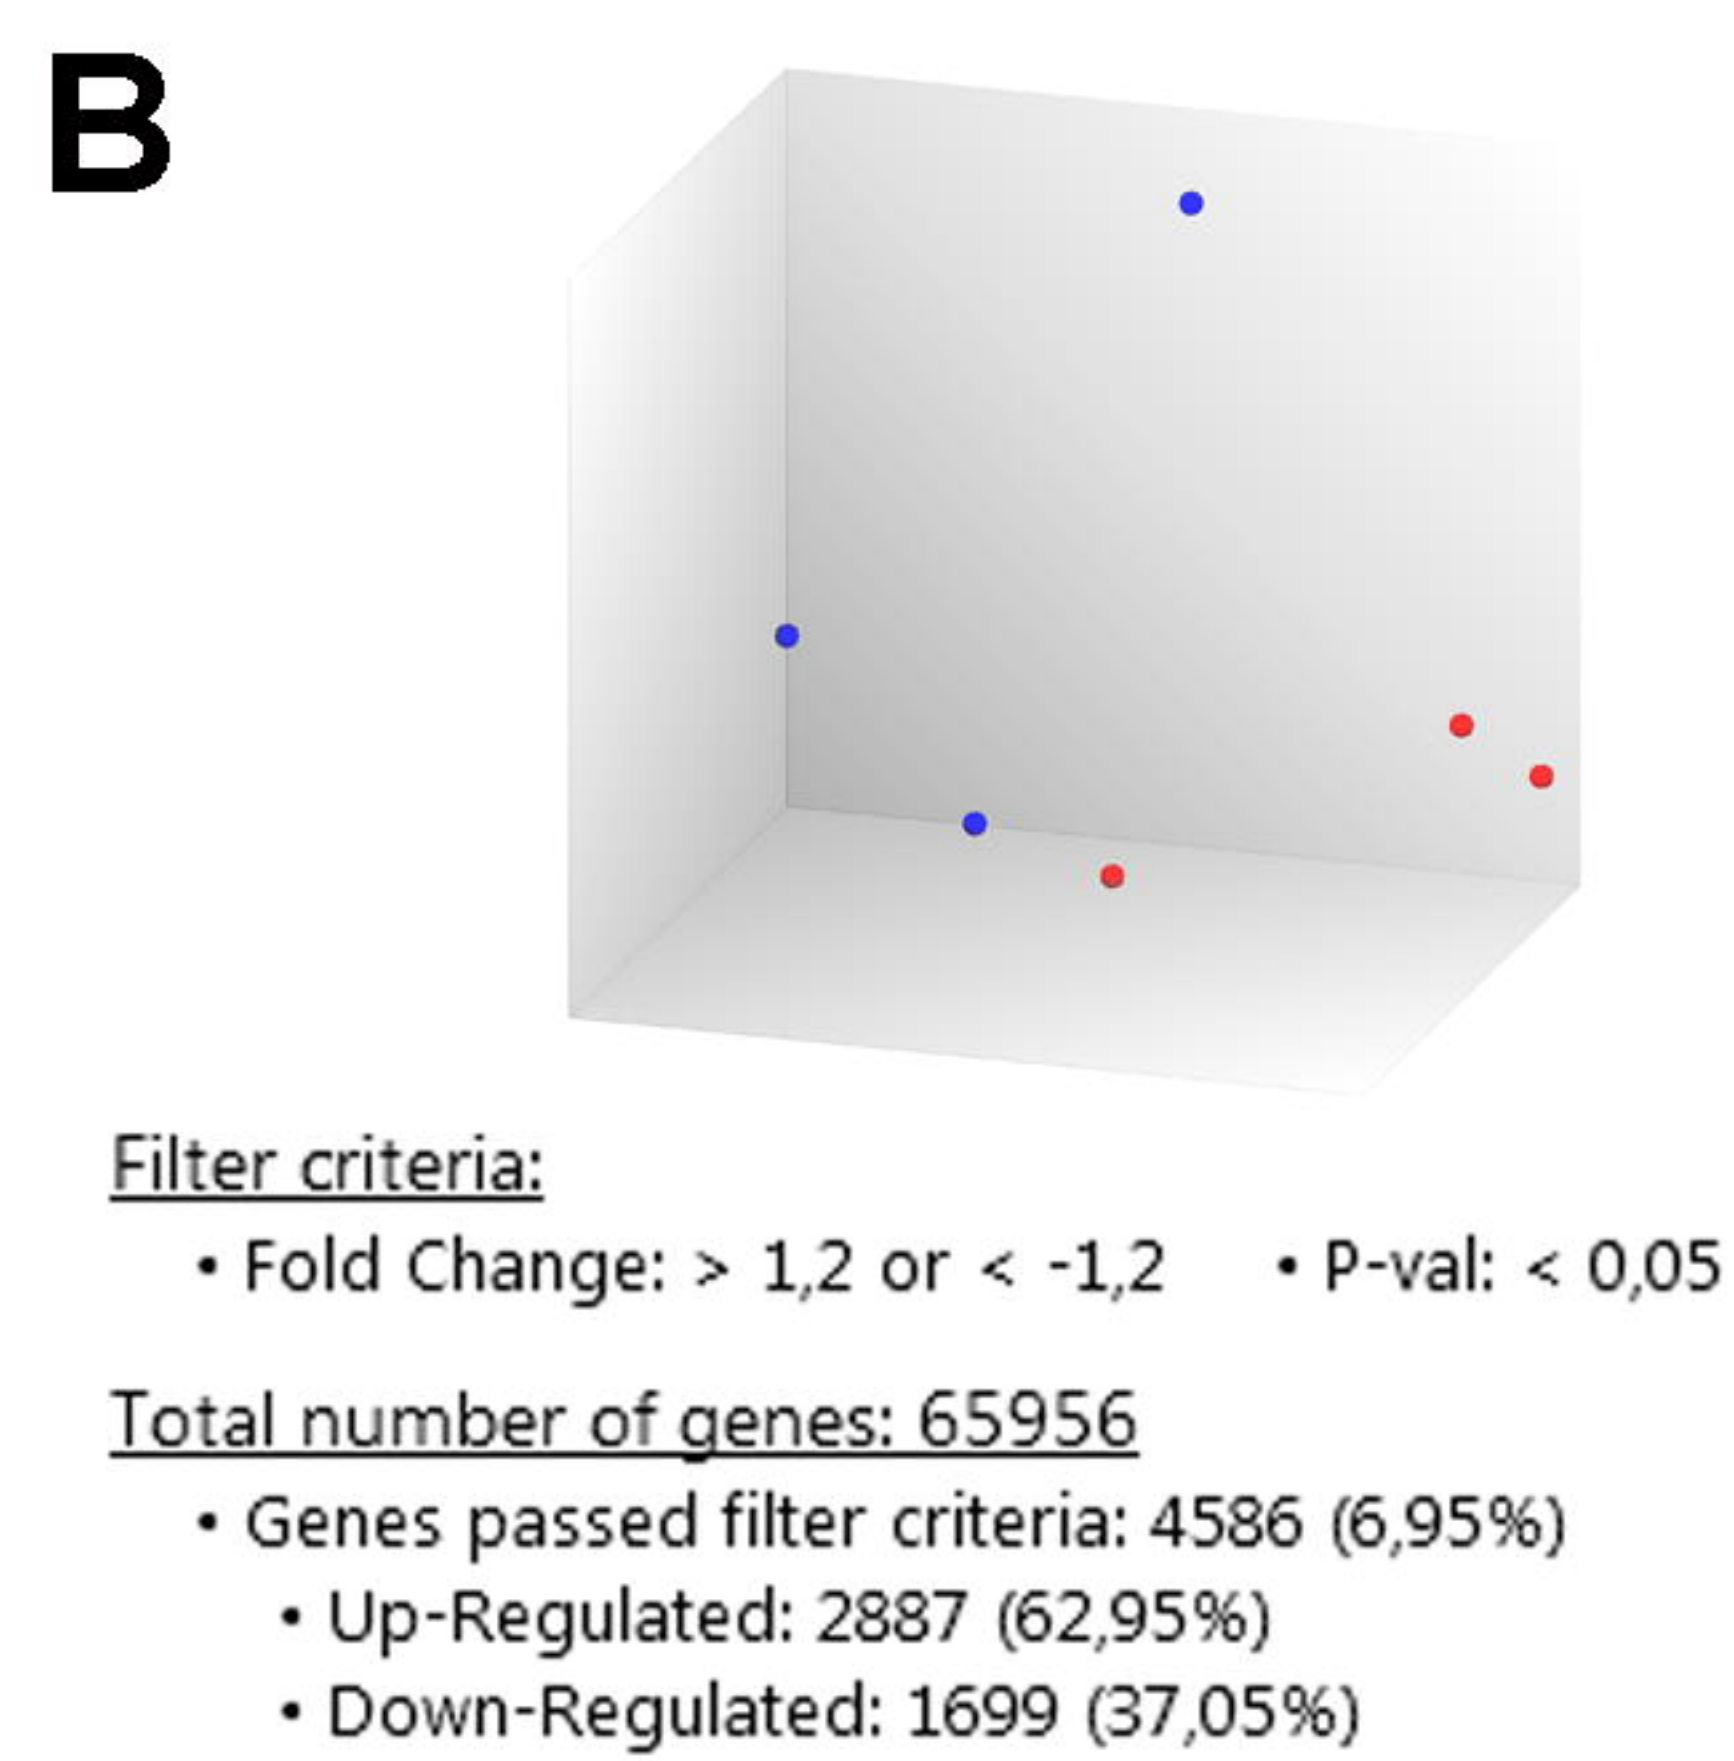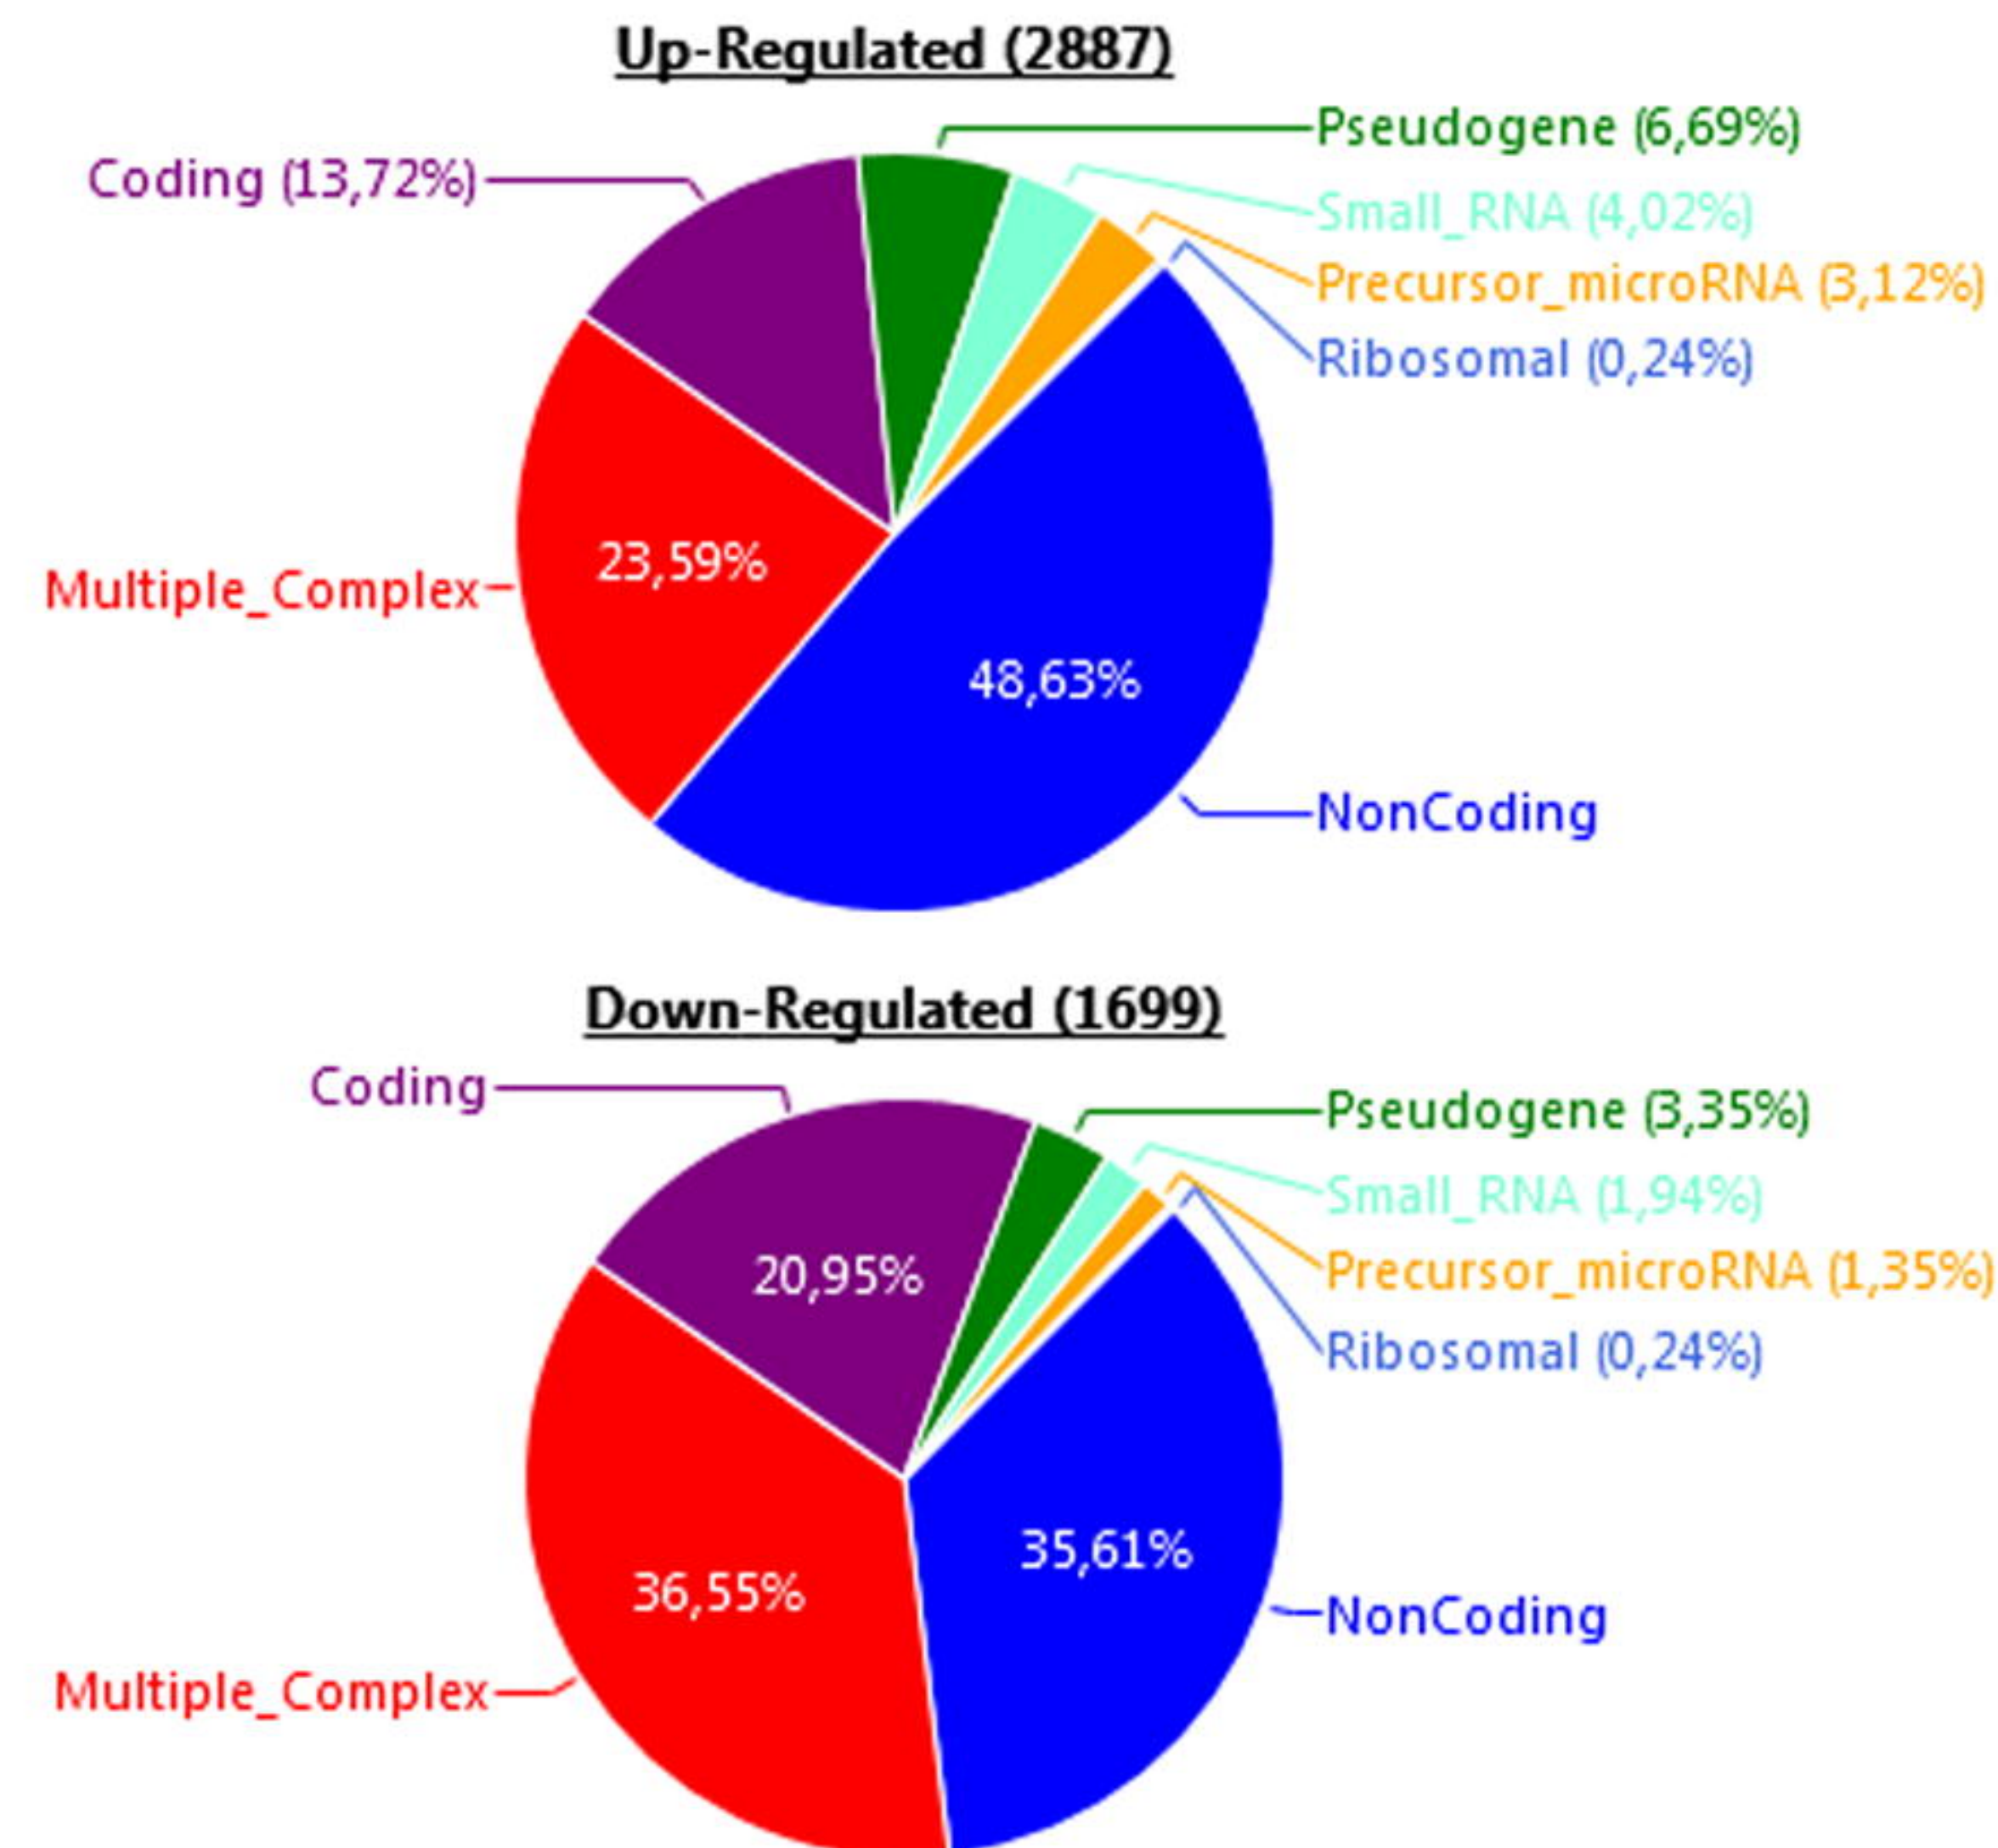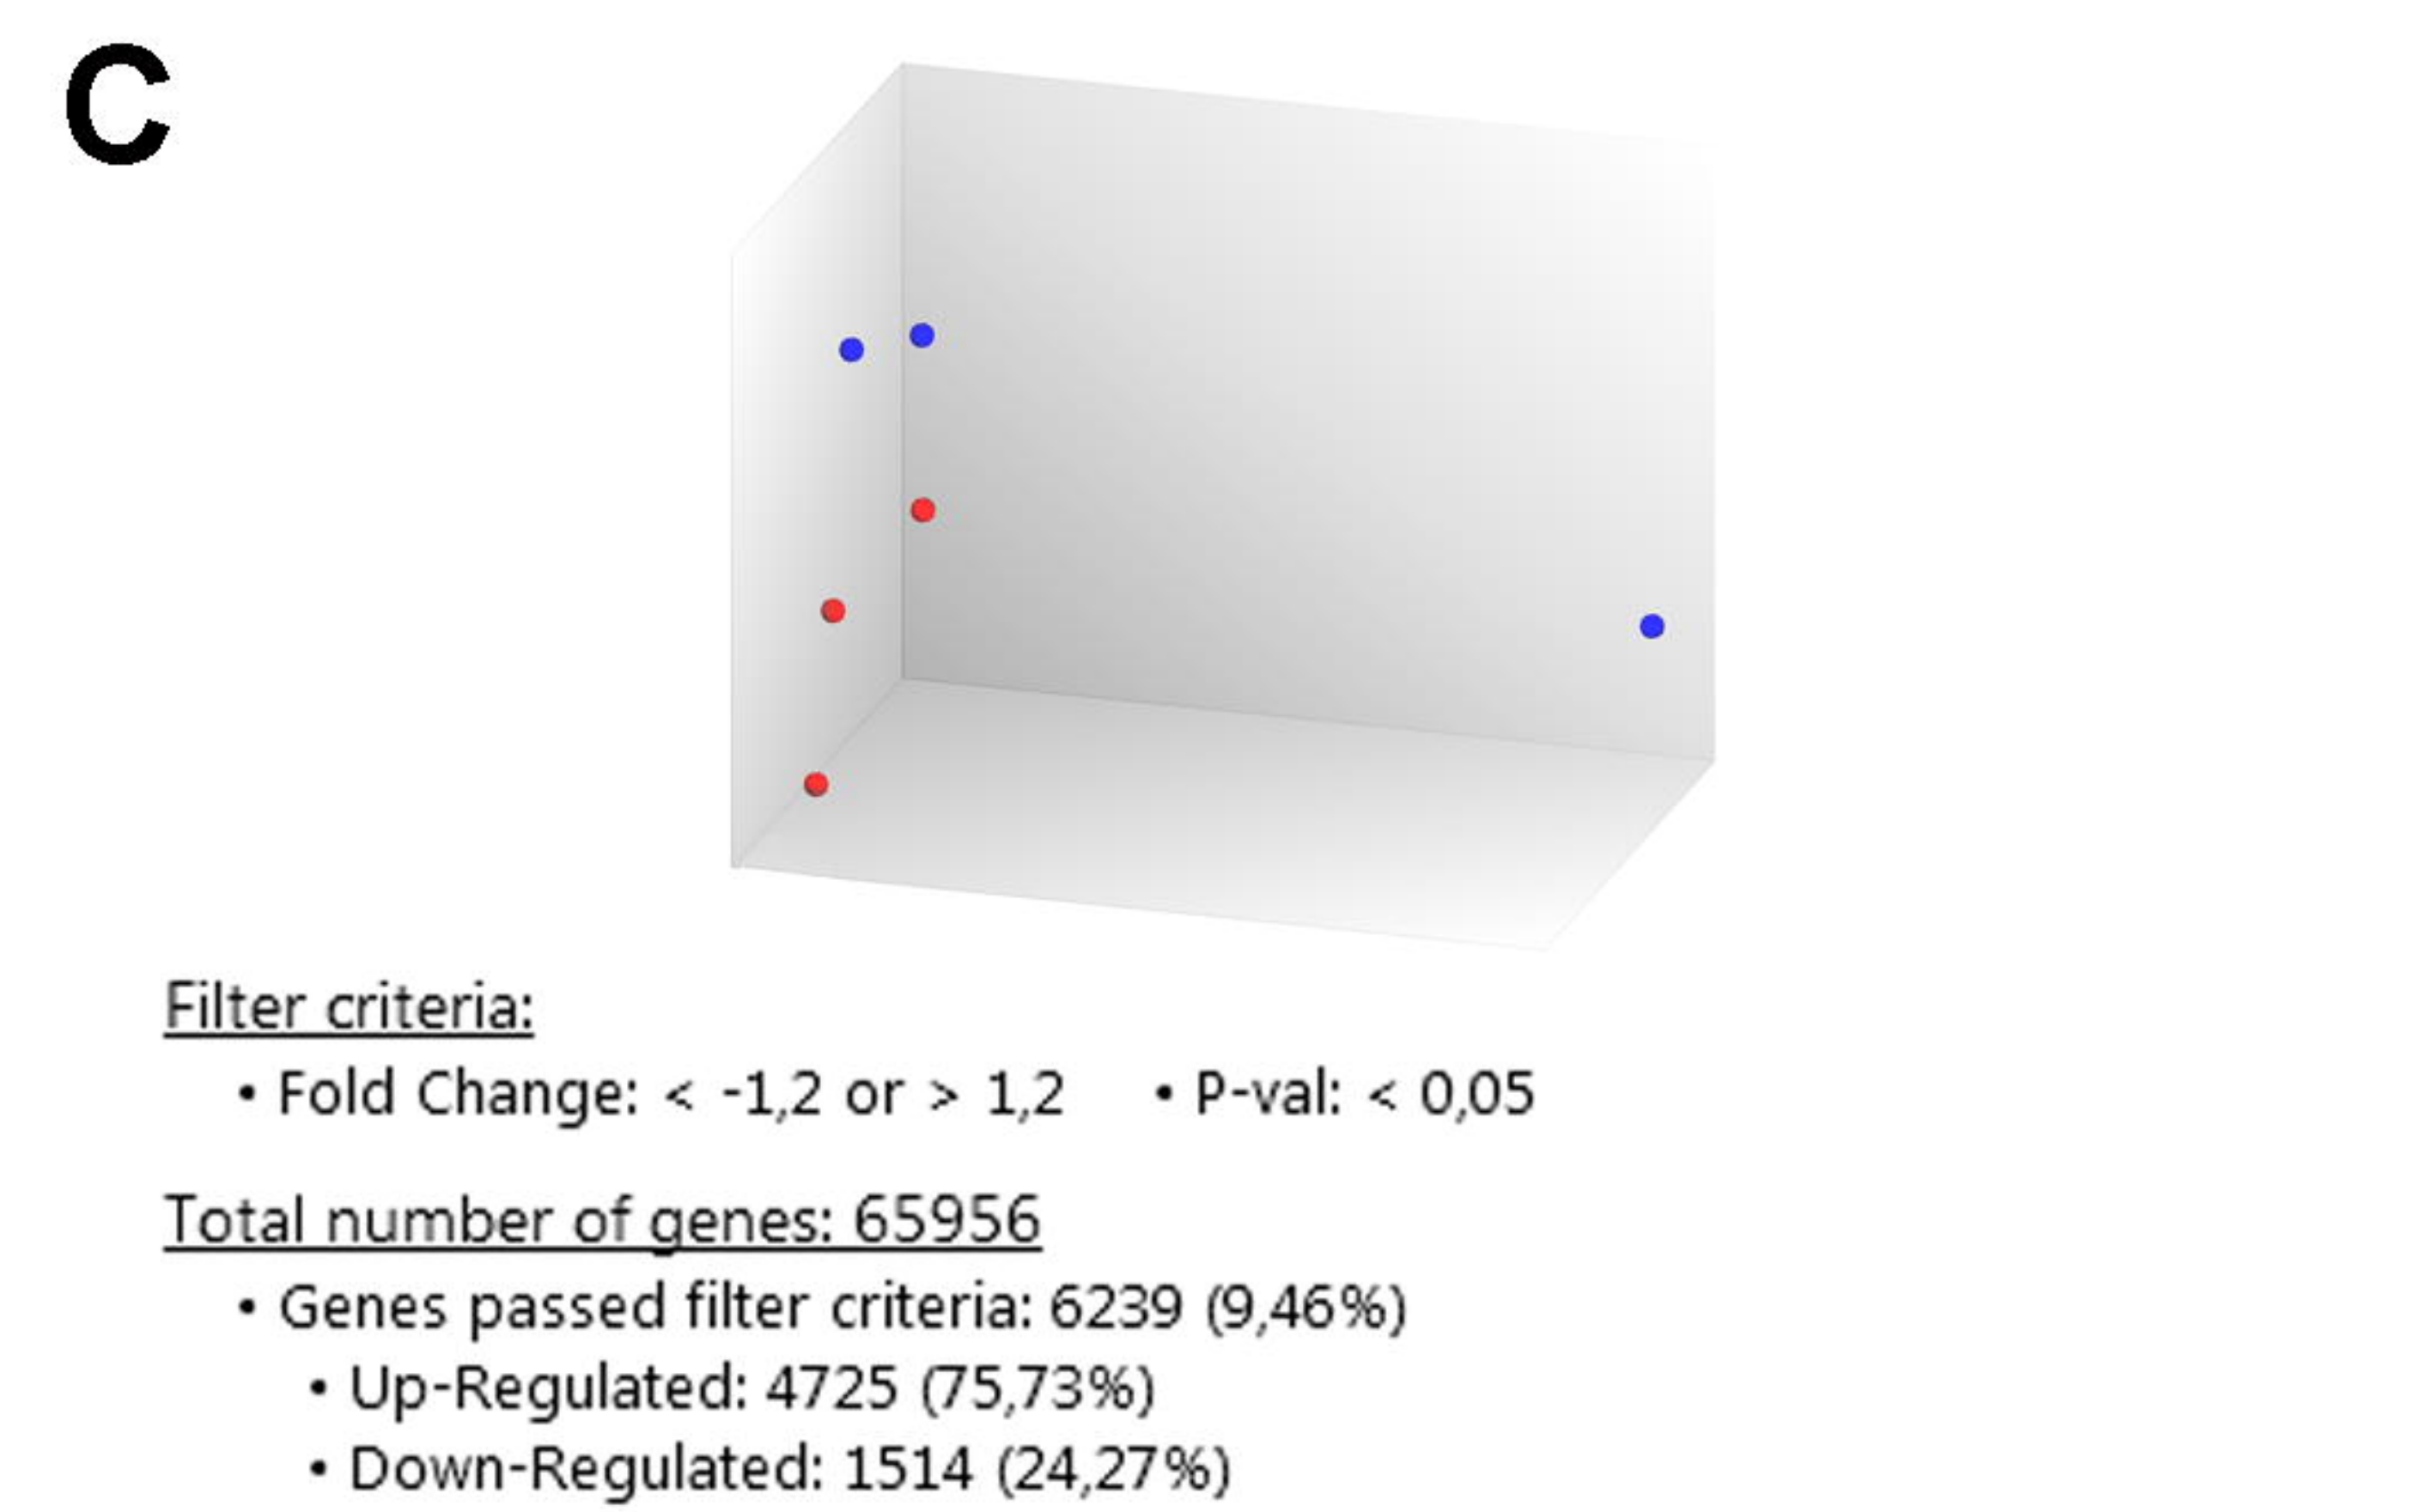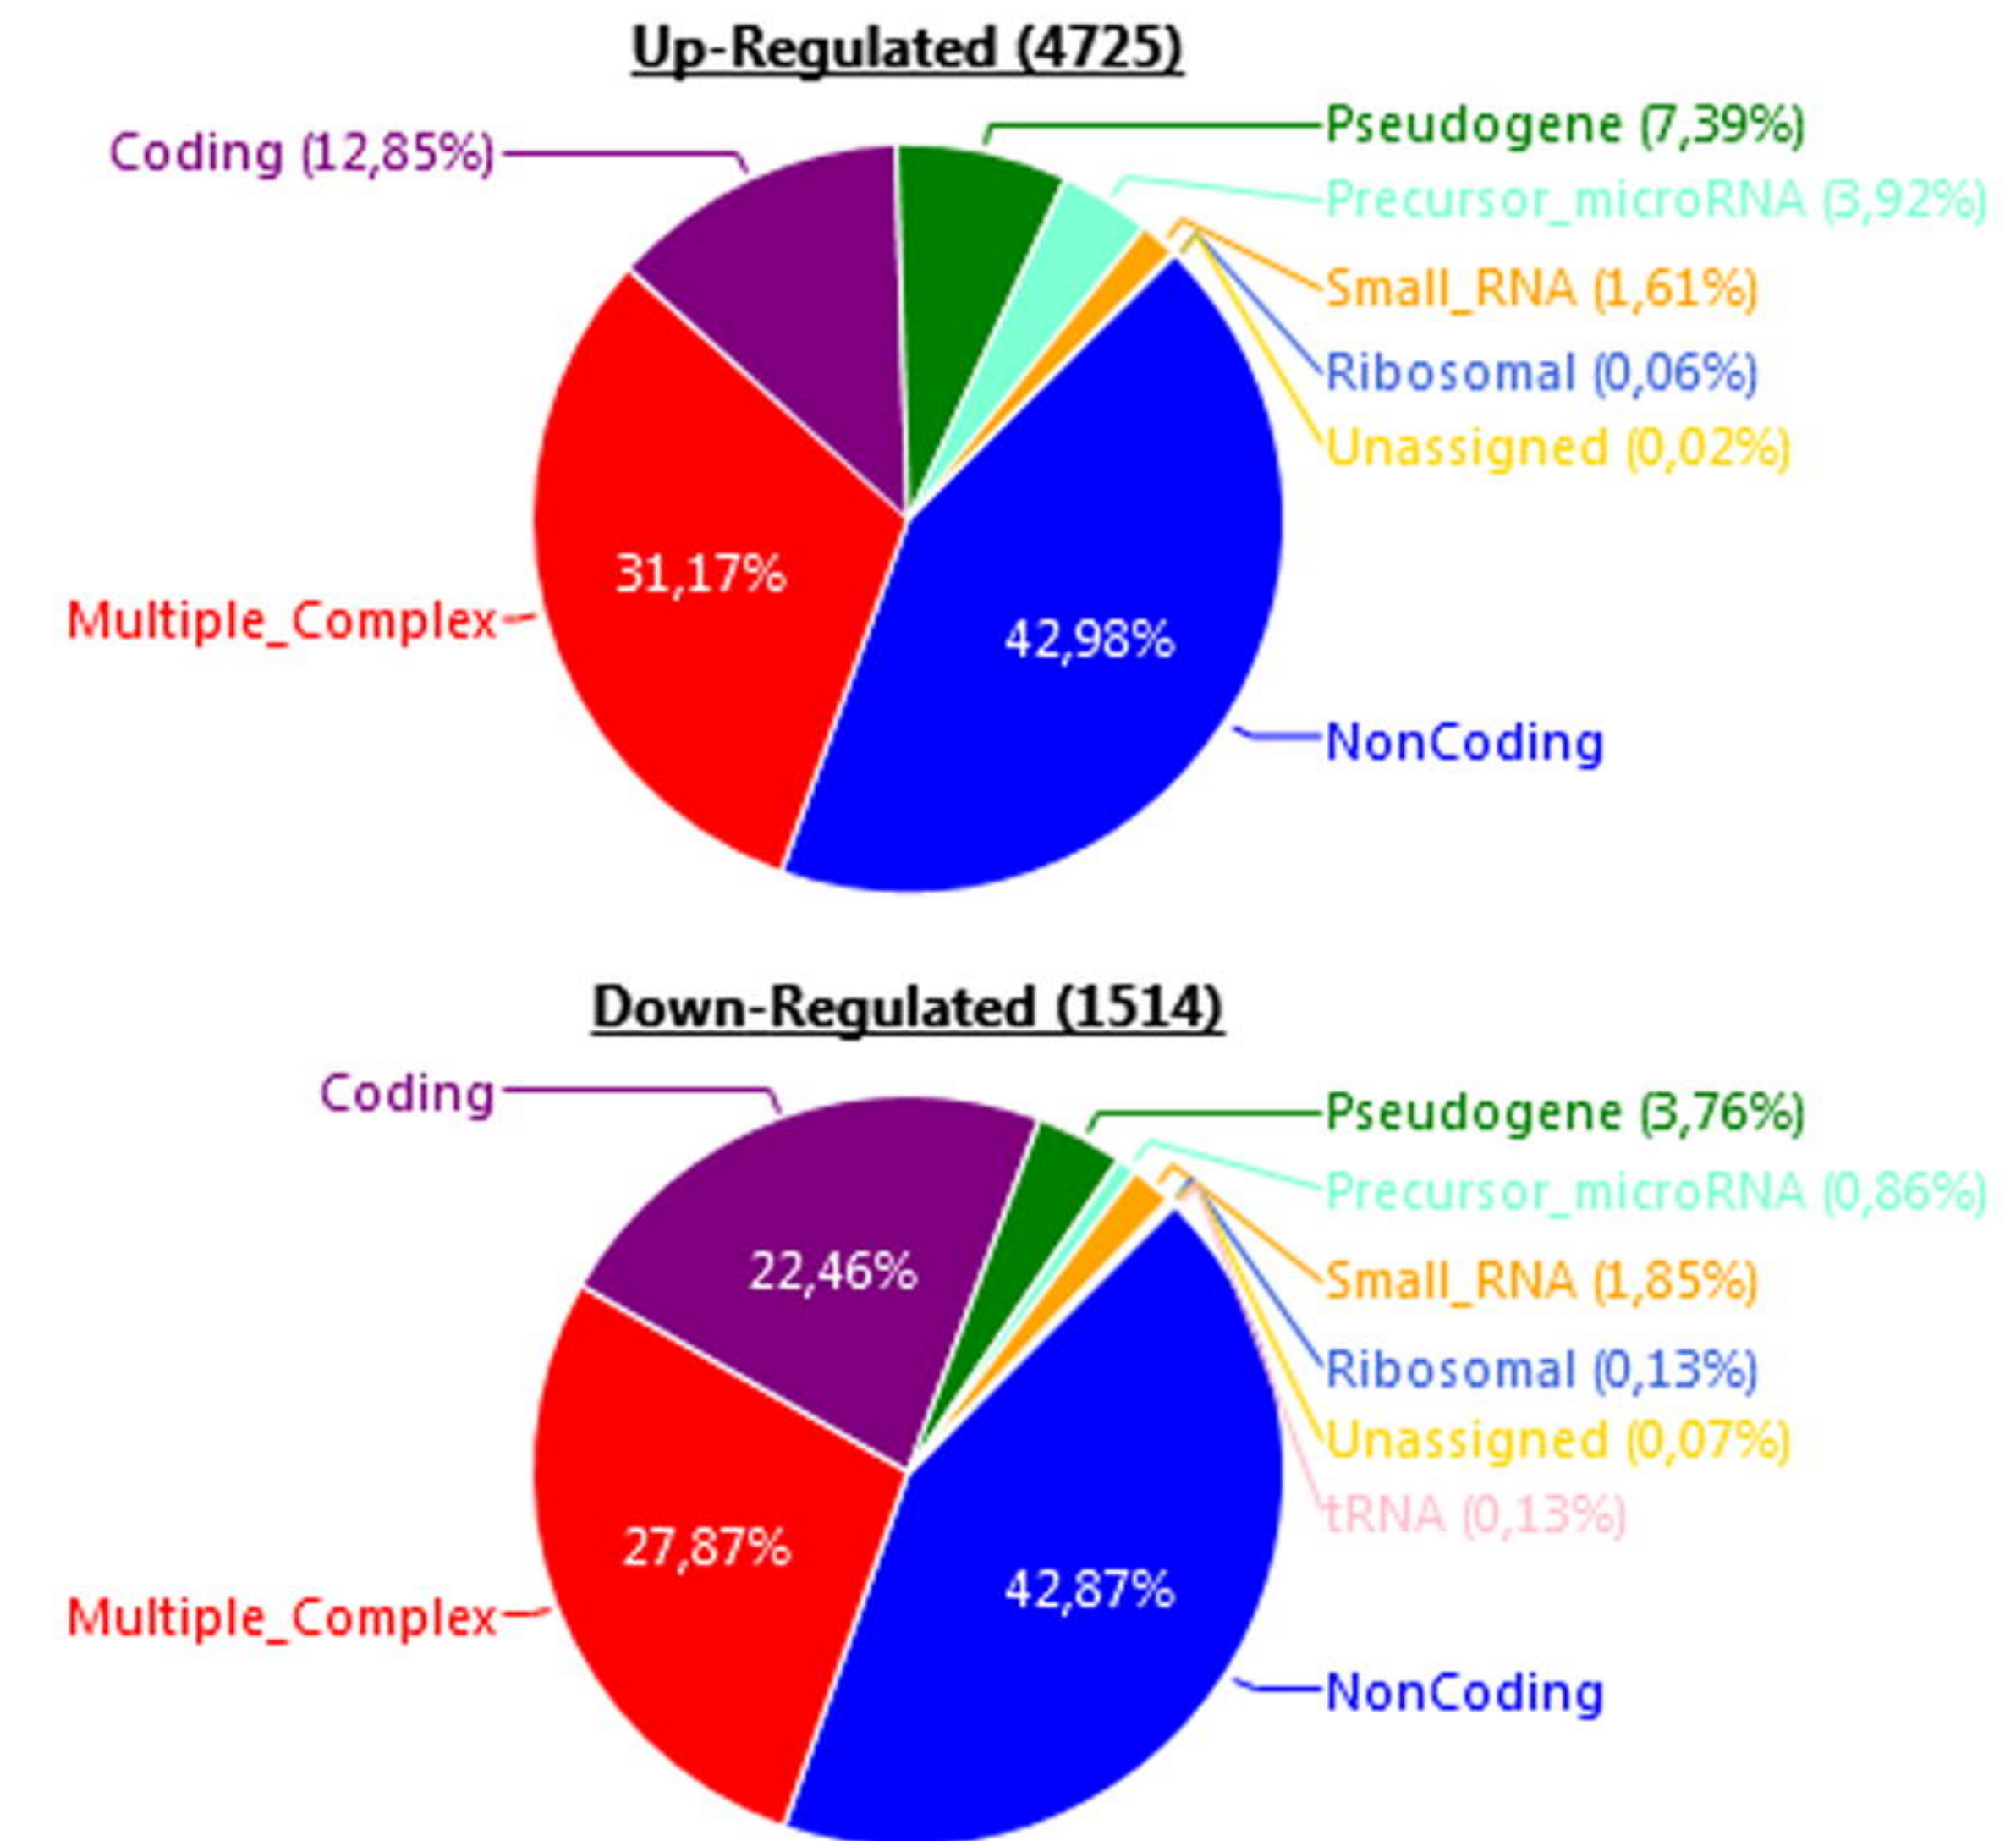



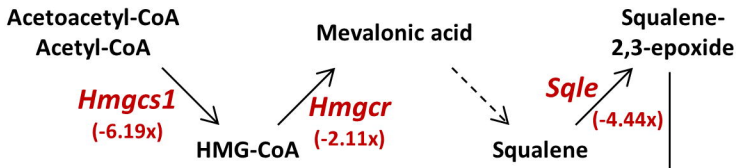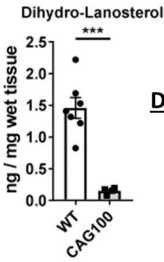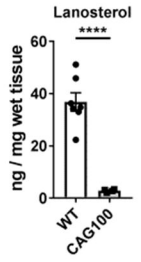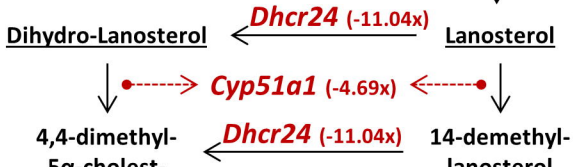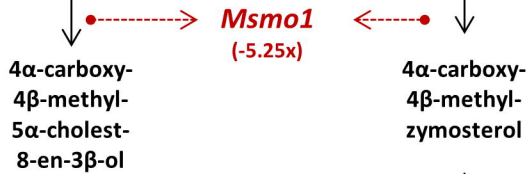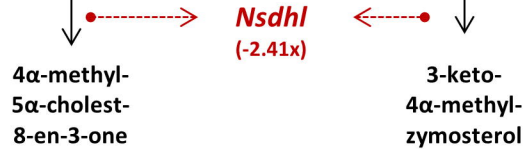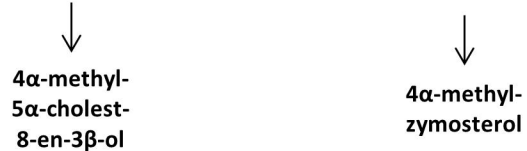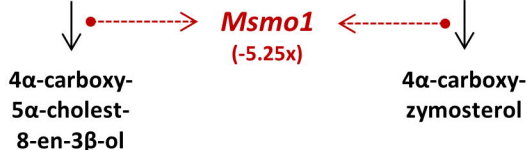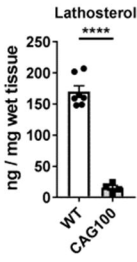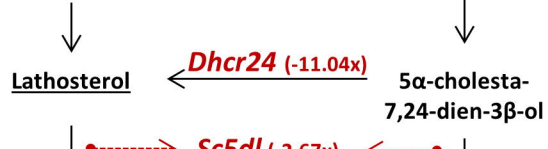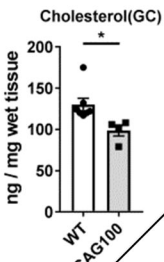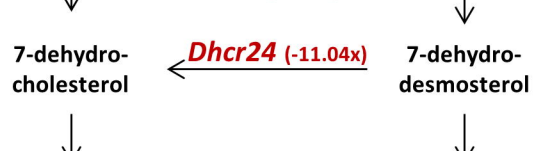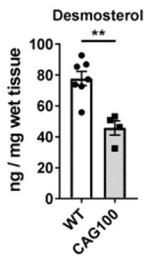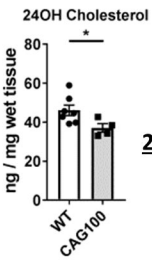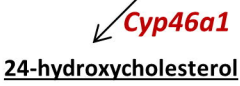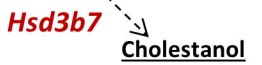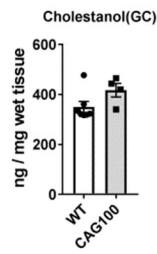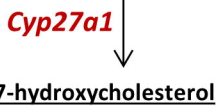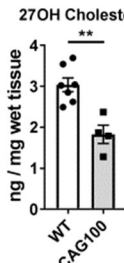

*Attn2*-CAG100-KnockIn mouse

| Gene Symbol | 10-week-old spinal cord |         |             | 14-month-old spinal cord |         |             |                                              |
|-------------|-------------------------|---------|-------------|--------------------------|---------|-------------|----------------------------------------------|
|             | Fold Change             | p-value | FDR p-value | Fold Change              | p-value | FDR p-value |                                              |
| Klk6        | -4.03                   | 0.00    | 0.12        | -23.08                   | 0.00    | 0.25        | androgen-dependent                           |
| Iih3        | -2.75                   | 0.00    | 0.12        | -11.79                   | 0.00    | 0.15        | denervation-triggered complement regulation  |
| Dhcr24      | -2.36                   | 0.00    | 0.30        | -11.04                   | 0.00    | 0.13        | cholesterol pathway                          |
| Etnpl1      | -3.99                   | 0.00    | 0.08        | -8.15                    | 0.00    | 0.14        |                                              |
| Idi1        | -1.58                   | 0.00    | 0.20        | -7.04                    | 0.00    | 0.06        | cholesterol pathway                          |
| Hmgcs1      | -2.01                   | 0.00    | 0.20        | -6.19                    | 0.00    | 0.01        | cholesterol pathway                          |
| Cdr1        | -2.31                   | 0.01    | 0.37        | -5.35                    | 0.00    | 0.02        | Cerebellar Degeneration Related Protein 1    |
| Msmo1       | -1.85                   | 0.00    | 0.32        | -5.25                    | 0.00    | 0.14        | cholesterol pathway                          |
| Ina         | -2.35                   | 0.00    | 0.25        | -4.72                    | 0.01    | 0.34        |                                              |
| Scn4b       | -2.47                   | 0.00    | 0.13        | -4.72                    | 0.00    | 0.05        |                                              |
| Copg2os2    | -2.63                   | 0.00    | 0.21        | -4.51                    | 0.00    | 0.02        |                                              |
| Nat8l       | -1.90                   | 0.00    | 0.31        | -4.33                    | 0.01    | 0.36        | AcetylCoA lipid metabolism and myelination   |
| Ii33        | -2.54                   | 0.00    | 0.20        | -4.24                    | 0.00    | 0.13        |                                              |
| Unc13c      | -2.06                   | 0.00    | 0.24        | -4.21                    | 0.00    | 0.21        |                                              |
| Ano3        | -1.84                   | 0.00    | 0.22        | -4.05                    | 0.00    | 0.06        | Dystonia/Tremor gene                         |
| Kcna2       | -2.34                   | 0.00    | 0.13        | -3.93                    | 0.01    | 0.31        | SCA gene                                     |
| Baal        | -1.63                   | 0.01    | 0.36        | -3.78                    | 0.01    | 0.34        |                                              |
| Clgn        | -2.09                   | 0.00    | 0.20        | -3.78                    | 0.00    | 0.23        | deep cerebellar nuclei, spinal motor neurons |
| Slc25a18    | -1.51                   | 0.02    | 0.43        | -3.73                    | 0.00    | 0.27        | mitochondrial glutamate carrier              |
| Slc6a11     | -2.41                   | 0.01    | 0.42        | -3.62                    | 0.00    | 0.20        | GABA transporter 3                           |
| Kif5a       | -2.42                   | 0.00    | 0.12        | -3.59                    | 0.00    | 0.24        | ALS gene                                     |
| Calb2       | -1.79                   | 0.01    | 0.36        | -3.56                    | 0.05    | 0.51        | Calretinin in GLUergic neurons               |
| Marf1       | -1.70                   | 0.00    | 0.29        | -3.52                    | 0.00    | 0.30        |                                              |
| Entpd3      | -1.54                   | 0.00    | 0.25        | -3.21                    | 0.00    | 0.23        |                                              |
| Hecw1       | -1.89                   | 0.00    | 0.13        | -3.16                    | 0.00    | 0.28        | ALS association                              |
| Kctd9       | -1.85                   | 0.00    | 0.17        | -3.16                    | 0.00    | 0.16        |                                              |
| Rph3a       | -1.80                   | 0.00    | 0.30        | -3.14                    | 0.00    | 0.16        |                                              |
| Rab37       | -1.74                   | 0.00    | 0.20        | -3.06                    | 0.00    | 0.28        |                                              |
| Serpinc1a   | -3.47                   | 0.00    | 0.12        | -3.03                    | 0.03    | 0.46        |                                              |
| Pcpd11      | -1.70                   | 0.00    | 0.29        | -3.01                    | 0.00    | 0.18        |                                              |
| Gnai        | -1.80                   | 0.01    | 0.36        | -2.95                    | 0.03    | 0.46        | Dystonia 25                                  |
| Sema7a      | -1.66                   | 0.00    | 0.14        | -2.89                    | 0.01    | 0.38        |                                              |
| Tnm37       | -1.96                   | 0.00    | 0.28        | -2.89                    | 0.01    | 0.32        |                                              |
| Rgs7bo      | -1.93                   | 0.00    | 0.24        | -2.88                    | 0.02    | 0.40        |                                              |
| Eif5a2      | -2.28                   | 0.00    | 0.21        | -2.87                    | 0.01    | 0.33        | interaction with PABPC1, viral translation   |
| Gabbr2      | -1.79                   | 0.00    | 0.31        | -2.79                    | 0.00    | 0.30        | GABA receptor in GLUergic neurons            |
| Panva       | -1.91                   | 0.00    | 0.14        | -2.77                    | 0.04    | 0.48        | Parvalbumin in GABAergic neurons             |
| Unc80       | -1.95                   | 0.00    | 0.20        | -2.71                    | 0.01    | 0.34        | interaction with SRC/EGFR, with TACR1        |
| Car2        | -2.61                   | 0.00    | 0.20        | -2.68                    | 0.00    | 0.17        |                                              |
| Plicxd2     | -1.56                   | 0.01    | 0.37        | -2.67                    | 0.00    | 0.16        |                                              |
| Sc5d        | -1.56                   | 0.00    | 0.24        | -2.67                    | 0.01    | 0.32        | cholesterol pathway                          |
| Sh3bgr12    | -1.63                   | 0.00    | 0.20        | -2.67                    | 0.00    | 0.28        |                                              |
| Sy2         | -1.64                   | 0.00    | 0.21        | -2.63                    | 0.01    | 0.31        |                                              |
| Usp31       | -1.55                   | 0.00    | 0.35        | -2.61                    | 0.02    | 0.41        |                                              |
| Cpix1       | -1.65                   | 0.01    | 0.41        | -2.56                    | 0.00    | 0.28        |                                              |
| Kctd3       | -1.79                   | 0.00    | 0.12        | -2.53                    | 0.00    | 0.28        |                                              |
| Kif5c       | -2.13                   | 0.00    | 0.13        | -2.53                    | 0.00    | 0.26        |                                              |
| Krt222      | -1.62                   | 0.00    | 0.24        | -2.53                    | 0.00    | 0.27        |                                              |
| Kif5b       | -1.81                   | 0.00    | 0.13        | -2.51                    | 0.00    | 0.28        |                                              |
| Etl4        | -1.77                   | 0.00    | 0.13        | -2.47                    | 0.00    | 0.29        |                                              |
| Scn1a       | -1.89                   | 0.01    | 0.39        | -2.47                    | 0.02    | 0.39        |                                              |
| Stx1b       | -1.81                   | 0.00    | 0.29        | -2.42                    | 0.00    | 0.24        |                                              |
| Uhmk1       | -1.94                   | 0.00    | 0.31        | -2.42                    | 0.03    | 0.47        |                                              |
| Frrs1       | -1.79                   | 0.00    | 0.23        | -2.40                    | 0.04    | 0.48        |                                              |
